# Supplementary material for: Au Induced Hydrogen Spillover on Au-TiO 2 for Highly Selective Ammonia Synthesis
Source: Research Square preprint supplement (doi:10.21203/rs.3.rs-7807562/v1), 2025-10-28
Supplement: Supplementary file 1 [file a983042d55ecd373c07bd271.xlsx]

## Sheet: Fig 1b
550	0.9897	550	0.9848
551	0.99485	552	0.99453
552	0.99485	554	1
553	0.99485	556	0.99899
554	1	558	0.99841
555	1	560	0.99942
556	0.99485	562	0.99407
557	1	564	0.98728
558	0.99485	566	0.97607
559	0.99485	568	0.97314
560	0.9897	570	0.95961
561	0.9897	572	0.94797
562	0.98712	574	0.93659
563	0.98197	576	0.92539
564	0.97939	578	0.90584
565	0.97939	580	0.89169
566	0.97166	582	0.8722
567	0.96909	584	0.85403
568	0.96136	586	0.82706
569	0.95621	588	0.80047
570	0.95106	590	0.76803
571	0.9459	592	0.73056
572	0.93813	594	0.68964
573	0.93556	596	0.64505
574	0.92525	598	0.59812
575	0.9201	600	0.54798
576	0.9098	602	0.50019
577	0.90207	604	0.4541
578	0.89434	606	0.40704
579	0.88661	608	0.36483
580	0.87631	610	0.32485
581	0.87116	612	0.28929
582	0.86081	614	0.25703
583	0.85308	616	0.2277
584	0.8402	618	0.20086
585	0.83505	620	0.17592
586	0.82475	622	0.15439
587	0.81187	624	0.13509
588	0.80156	626	0.11722
589	0.78868	628	0.1017
590	0.77834	630	0.08715
591	0.76803	632	0.07448
592	0.7603	634	0.06262
593	0.75	636	0.05205
594	0.73454	638	0.04241
595	0.71909	640	0.03389
596	0.71136	642	0.0258
597	0.69844	644	0.01869
598	0.68813	646	0.0118
599	0.67783	648	0.00575
600	0.66237	650	0
601	0.65207
602	0.63661
603	0.62631
604	0.61339
605	0.60308
606	0.58763
607	0.57732
608	0.56187
609	0.54641
610	0.53349
611	0.52318
612	0.50773
613	0.49485
614	0.48197
615	0.46651
616	0.45359
617	0.43813
618	0.42783
619	0.41237
620	0.39949
621	0.38919
622	0.37369
623	0.35823
624	0.34278
625	0.33505
626	0.32217
627	0.30671
628	0.29122
629	0.27834
630	0.26803
631	0.25258
632	0.23454
633	0.22424
634	0.21389
635	0.19586
636	0.18041
637	0.16753
638	0.15465
639	0.13919
640	0.12884
641	0.11339
642	0.10051
643	0.08505
644	0.07475
645	0.06444
646	0.04894
647	0.03606
648	0.02576
649	0.01288
650	0
--	--
--	--
--	--
--	--
--	--
--	--
--	--
--	--
--	--
--	--
--	--
--	--
--	--
--	--
--	--
--	--
--	--
--	--
--	--
--	--
--	--
--	--
--	--
--	--
--	--
--	--
--	--
--	--
--	--
--	--
--	--
--	--
--	--
--	--
--	--
--	--
--	--
--	--
--	--
--	--
--	--
--	--
--	--
--	--
--	--
--	--
--	--
--	--
--	--
--	--
--	--
--	--
--	--
--	--
--	--
--	--
--	--
--	--
--	--
--	--
--	--
--	--
--	--
--	--
--	--
--	--
--	--
--	--
--	--
--	--
--	--
--	--
--	--
--	--
--	--
--	--
--	--
--	--
--	--
--	--
--	--
--	--
--	--
--	--
--	--
--	--
--	--
--	--
--	--
--	--
--	--
--	--
--	--
--	--
--	--
--	--
--	--
--	--
--	--
--	--
--	--
--	--
--	--
--	--
--	--
--	--
--	--
--	--
--	--
--	--
--	--
--	--
--	--
--	--
--	--
--	--
--	--
--	--
--	--
--	--
--	--
--	--
--	--
--	--
--	--
--	--
--	--
--	--
--	--
--	--
--	--
--	--
--	--
--	--
--	--
--	--
--	--
--	--
--	--
--	--
--	--
--	--
--	--
--	--
--	--
--	--
--	--
--	--
--	--
--	--
--	--
--	--
--	--
--	--
--	--
--	--
--	--
--	--
--	--
--	--
--	--
--	--
--	--
--	--
--	--
--	--
--	--
--	--
--	--
--	--
--	--
--	--
--	--
--	--
--	--
--	--
--	--
--	--
--	--
--	--
--	--
--	--
--	--
--	--
--	--
--	--
--	--
--	--
--	--
--	--
--	--
--	--
--	--
--	--
--	--
--	--
--	--
--	--
--	--
--	--
--	--
--	--
--	--
--	--
--	--
--	--
--	--
--	--
--	--
--	--
--	--
--	--
--	--
--	--
--	--
--	--
--	--
--	--
--	--
--	--
--	--
--	--
--	--
--	--
--	--
--	--
--	--
--	--
--	--
--	--
--	--
--	--
--	--
--	--
--	--
--	--
--	--
--	--
--	--
--	--
--	--
--	--
--	--
--	--
--	--
--	--
--	--
--	--
--	--
--	--
--	--
--	--
--	--
--	--
--	--
--	--
--	--
--	--
--	--
--	--
--	--
--	--
--	--
--	--
--	--
--	--
--	--
--	--
--	--
--	--
--	--
--	--
--	--
--	--
--	--
--	--
--	--
--	--
--	--
--	--
--	--
--	--
--	--
--	--
--	--
--	--
--	--
--	--
--	--
--	--
--	--
--	--
--	--
--	--
--	--
--	--
--	--
--	--
--	--
--	--
--	--
--	--
--	--
--	--
--	--
--	--
--	--
--	--
--	--
--	--
--	--
--	--
--	--
--	--
--	--
--	--
--	--
--	--
--	--
--	--
--	--
--	--
--	--
--	--
--	--
--	--
--	--
--	--
--	--
--	--
--	--
--	--
--	--
--	--
--	--
--	--
--	--
--	--
--	--
--	--
--	--
--	--
--	--
--	--
--	--
--	--
--	--
--	--
--	--
--	--
--	--
--	--
--	--
--	--
--	--
--	--
--	--
--	--
--	--
--	--
--	--
--	--
--	--
--	--
--	--
--	--
--	--
--	--
--	--
--	--
--	--
--	--
--	--
--	--
--	--
--	--
--	--
--	--
--	--
--	--
--	--
--	--
--	--
--	--
--	--
--	--
--	--
--	--
--	--
--	--
--	--
--	--
--	--
--	--
--	--
--	--
--	--
--	--
--	--
--	--
--	--
--	--
--	--
--	--
--	--
--	--
--	--
--	--
--	--
--	--
--	--
--	--
--	--
--	--
--	--
--	--
--	--
--	--
--	--
--	--
--	--
--	--
--	--
--	--
--	--
--	--
--	--
--	--
--	--
--	--
--	--
--	--
--	--
--	--
--	--
--	--
--	--
--	--
--	--
--	--
--	--
--	--
--	--
--	--
--	--
--	--
--	--
--	--
--	--
--	--
--	--
--	--
--	--
--	--
--	--
--	--
--	--
--	--
--	--
--	--
--	--
--	--
--	--
--	--
--	--
--	--
--	--
--	--
--	--
--	--
--	--
--	--
--	--
--	--
--	--
--	--
--	--
--	--
--	--
--	--
--	--
--	--
--	--
--	--
--	--
--	--
--	--
--	--
--	--
--	--
--	--
--	--
--	--
--	--
--	--
--	--
--	--
--	--
--	--
--	--
--	--
--	--
--	--
--	--
--	--
--	--
--	--
--	--
--	--
--	--
--	--
--	--
--	--
--	--
--	--
--	--
--	--
--	--
--	--
--	--
--	--
--	--
--	--
--	--
--	--
--	--
--	--
--	--
--	--
--	--
--	--
--	--
--	--
--	--
--	--
--	--
--	--
--	--
--	--
--	--
--	--
--	--
--	--
--	--
--	--
--	--
--	--
--	--
--	--
--	--
--	--
--	--
--	--
--	--
--	--
--	--
--	--
--	--
--	--
--	--
--	--
--	--
--	--
--	--
--	--
--	--
--	--
--	--
--	--
--	--
--	--
--	--
--	--
--	--
--	--
--	--
--	--
--	--
--	--
--	--
--	--
--	--
--	--
--	--
--	--
--	--
--	--
--	--
--	--
--	--
--	--
--	--
--	--
--	--
--	--
--	--
--	--
--	--
--	--
--	--
--	--
--	--
--	--
--	--
--	--
--	--
--	--
--	--
--	--
--	--
--	--
--	--
--	--
--	--
--	--
--	--
--	--
--	--
--	--
--	--
--	--
--	--
--	--
--	--
--	--
--	--
--	--
--	--
--	--
--	--
--	--
--	--
--	--
--	--
--	--
--	--
--	--
--	--
--	--
--	--
--	--
--	--
--	--
--	--
--	--
--	--
--	--
--	--
--	--
--	--
--	--
--	--
--	--
--	--
--	--
--	--
--	--
--	--
--	--
--	--
--	--
--	--
--	--
--	--
--	--
--	--
--	--
--	--
--	--
--	--
--	--
--	--
--	--
--	--
--	--
--	--
--	--
--	--
--	--
--	--
--	--
--	--
--	--
--	--
--	--
--	--
--	--
--	--
--	--
--	--
--	--
--	--
--	--
--	--
--	--
--	--
--	--
--	--
--	--
--	--
--	--
--	--
--	--
--	--
--	--
--	--
--	--
--	--
--	--
--	--
--	--
--	--
--	--
--	--
--	--
--	--
--	--
--	--
--	--
--	--
--	--
--	--
--	--
--	--
--	--
--	--
--	--
--	--
--	--
--	--
--	--
--	--
--	--
--	--
--	--
--	--
--	--
--	--
--	--
--	--
--	--
--	--
--	--
--	--
--	--
--	--
--	--
--	--
--	--
--	--
--	--
--	--
--	--
--	--
--	--
--	--
--	--
--	--
--	--
--	--
--	--

## Sheet: Fig 1e&f
<10	2.08333		<10	15.3846
10.-20	31.25		10.-15	23.9316
20-40	41.6667		15-20	41.0256
40-60	20.8333		20-30	13.6752
>60	4.16667		>30	5.98291

## Sheet: fig 2a
400	0.01425	0.01138
401	0.0167	0.01319
402	0.01469	0.01439
403	0.01417	0.01332
404	0.01366	0.0131
405	0.01611	0.00852
406	0.0141	0.00903
407	0.01507	0.00843
408	0.01307	0.00765
409	0.01403	0.01009
410	0.01351	0.00976
411	0.01151	0.01036
412	0.01099	0.00875
413	0.01196	0.00525
414	0.00995	0.00885
415	0.00646	0.01109
416	0.0104	0.00986
417	0.01137	0.01542
418	0.00639	0.01708
419	0.00736	0.01182
420	0.00832	0.01234
421	0.00632	0.01282
422	0.00729	0.01634
423	0.00528	0.01296
424	0.00625	0.01068
425	0.00573	0.00816
426	0.00521	0.01265
427	0.00618	0.01507
428	0.00417	0.01453
429	0.00365	0.01405
430	0.00462	0.01258
431	0.00559	0.01307
432	0.00507	0.01045
433	0.00604	0.01089
434	0.00552	0.00726
435	0.00496	0.00762
436	0.0044	0.00663
437	0.00384	0.00969
438	0.00328	0.00979
439	0.00272	0.00818
440	0.00365	0.00563
441	0.00458	0.00692
442	0.00253	0.00734
443	0.00197	0.00763
444	0.0029	0.00726
445	0.00234	0.00681
446	0.000298523	0.00853
447	0.00123	0.007
448	0.00364	0.00353
449	0.00159	0.000252838
450	0.00104	0
451	0.00196	0.00673
452	0.0014	0.00727
453	0.00233	0.00692
454	0.00177	0.00563
455	0.00419	0.00464
456	0.00214	0.00379
457	0.00307	0.00582
458	0.00102	0.0067
459	0.00344	0.00563
460	0.00437	0.01109
461	0.00381	0.01069
462	0.00176	0.00657
463	0.00566	0.00454
464	0.0051	0.00673
465	0.00603	0.01083
466	0.00547	0.01108
467	0.00788	0.00977
468	0.0103	0.00991
469	0.01043	0.01286
470	0.0124	0.01323
471	0.01586	0.01296
472	0.01635	0.01486
473	0.01832	0.01413
474	0.02178	0.0156
475	0.02673	0.02053
476	0.03019	0.0216
477	0.03365	0.02321
478	0.03711	0.02513
479	0.04206	0.02629
480	0.04552	0.0274
481	0.05195	0.03314
482	0.0569	0.0413
483	0.06184	0.04439
484	0.06679	0.04874
485	0.07322	0.0545
486	0.08114	0.05961
487	0.08757	0.06689
488	0.09549	0.07548
489	0.10341	0.07818
490	0.11133	0.08126
491	0.12073	0.09209
492	0.13014	0.09949
493	0.13954	0.10641
494	0.15044	0.11327
495	0.15984	0.1224
496	0.1737	0.13174
497	0.18311	0.14343
498	0.19846	0.15069
499	0.20935	0.16057
500	0.22321	0.16974
501	0.24005	0.17794
502	0.25391	0.18472
503	0.27075	0.1933
504	0.2861	0.20084
505	0.30294	0.21091
506	0.31977	0.2235
507	0.33661	0.23433
508	0.35493	0.24218
509	0.37028	0.25611
510	0.38563	0.27113
511	0.40247	0.28215
512	0.42079	0.29034
513	0.43911	0.30672
514	0.45595	0.31938
515	0.47278	0.33398
516	0.49259	0.34746
517	0.50943	0.3604
518	0.53072	0.37172
519	0.5431	0.38524
520	0.5644	0.39888
521	0.58123	0.41066
522	0.60104	0.42164
523	0.62085	0.42378
524	0.63769	0.44407
525	0.65601	0.45492
526	0.67433	0.46792
527	0.68968	0.48065
528	0.70503	0.49236
529	0.72187	0.50027
530	0.73573	0.51022
531	0.75108	0.51933
532	0.76643	0.52946
533	0.77881	0.54381
534	0.79267	0.55492
535	0.80654	0.56807
536	0.8204	0.57934
537	0.83575	0.59066
538	0.84664	0.59993
539	0.85753	0.61007
540	0.86694	0.62381
541	0.8808	0.6386
542	0.89021	0.65135
543	0.89813	0.65896
544	0.90604	0.6734
545	0.91545	0.683
546	0.92485	0.68964
547	0.93277	0.70109
548	0.93921	0.71411
549	0.94564	0.72707
550	0.95058	0.7391
551	0.95999	0.75329
552	0.96494	0.76408
553	0.96988	0.77147
554	0.97186	0.78497
555	0.9768	0.79748
556	0.98026	0.81051
557	0.98224	0.82053
558	0.98718	0.83506
559	0.98767	0.82629
560	0.99262	0.84697
561	0.99459	0.85561
562	0.99359	0.86297
563	0.99556	0.87104
564	0.99457	0.87879
565	0.99803	0.88642
566	1	0.89952
567	0.99454	0.90485
568	0.99503	0.91537
569	0.99552	0.9014
570	0.99601	0.91057
571	0.99203	0.92061
572	0.99104	0.92937
573	0.99004	0.93858
574	0.98755	0.9392
575	0.98655	0.94298
576	0.98258	0.94647
577	0.9801	0.95067
578	0.9791	0.95568
579	0.97513	0.9596
580	0.97264	0.96437
581	0.97016	0.96828
582	0.9647	0.97025
583	0.9637	0.97473
584	0.95824	0.97959
585	0.95427	0.98235
586	0.9503	0.98293
587	0.94633	0.9871
588	0.94087	0.99115
589	0.9369	0.99021
590	0.93144	0.98692
591	0.92599	0.99124
592	0.92202	0.99632
593	0.91507	1
594	0.90962	0.9986
595	0.90267	0.99681
596	0.8987	0.99997
597	0.89027	0.9977
598	0.88779	0.99475
599	0.87787	0.99546
600	0.8739	0.99269
601	0.86695	0.98998
602	0.8615	0.98866
603	0.85604	0.99162
604	0.8491	0.99131
605	0.84067	0.99081
606	0.83521	0.98782
607	0.82827	0.98665
608	0.82132	0.98524
609	0.81438	0.9812
610	0.80446	0.9779
611	0.799	0.96503
612	0.78909	0.97162
613	0.78363	0.97509
614	0.77669	0.9545
615	0.76677	0.95093
616	0.75686	0.94958
617	0.74991	0.95225
618	0.74297	0.94936
619	0.73751	0.9421
620	0.72908	0.93865
621	0.72065	0.93487
622	0.71371	0.93017
623	0.70528	0.92819
624	0.69982	0.92594
625	0.69436	0.91877
626	0.68445	0.9105
627	0.67453	0.90894
628	0.6661	0.90121
629	0.65916	0.89632
630	0.65073	0.89111
631	0.6423	0.88468
632	0.63387	0.87735
633	0.62692	0.87103
634	0.61849	0.86733
635	0.61155	0.86019
636	0.60163	0.85177
637	0.59469	0.84443
638	0.58477	0.83901
639	0.57932	0.8332
640	0.57089	0.8223
641	0.56394	0.81818
642	0.55551	0.80878
643	0.54708	0.80436
644	0.54014	0.7968
645	0.53171	0.78729
646	0.52477	0.77947
647	0.51782	0.77149
648	0.51088	0.75929
649	0.50245	0.7523
650	0.49551	0.74408
651	0.48856	0.73457
652	0.48162	0.72408
653	0.47468	0.71161
654	0.46625	0.70644
655	0.4593	0.69752
656	0.45236	0.69031
657	0.44541	0.68514
658	0.43698	0.67115
659	0.43004	0.66236
660	0.4231	0.65536
661	0.41318	0.64933
662	0.40921	0.64074
663	0.40227	0.63129
664	0.39532	0.62775
665	0.38838	0.61894
666	0.38144	0.60888
667	0.37598	0.60293
668	0.36903	0.59713
669	0.36209	0.58962
670	0.35812	0.58203
671	0.35118	0.57248
672	0.34572	0.56416
673	0.33878	0.55781
674	0.3348	0.5515
675	0.32786	0.54111
676	0.3224	0.5317
677	0.31546	0.52213
678	0.31	0.5142
679	0.30603	0.50849
680	0.29909	0.50011
681	0.29363	0.49187
682	0.28966	0.48362
683	0.28272	0.47257
684	0.27726	0.4643
685	0.27329	0.45725
686	0.26634	0.44804
687	0.26237	0.44185
688	0.25691	0.43482
689	0.25146	0.42776
690	0.24749	0.41987
691	0.24351	0.41728
692	0.23806	0.40969
693	0.23557	0.40128
694	0.22863	0.39594
695	0.22466	0.39179
696	0.2192	0.38304
697	0.21523	0.37325
698	0.21126	0.36774
699	0.20729	0.35909
700	0.20183	0.35184
701	0.19934	0.34858
702	0.19389	0.34248
703	0.18992	0.33665
704	0.18743	0.33595
705	0.18197	0.33441
706	0.17949	0.32898
707	0.177	0.31923
708	0.17155	0.31243
709	0.16906	0.31178
710	0.1636	0.30714
711	0.16112	0.30345
712	0.15715	0.30093
713	0.15466	0.29437
714	0.15069	0.29394
715	0.14821	0.28939
716	0.14424	0.28493
717	0.14175	0.27752
718	0.14075	0.27141
719	0.1353	0.26643
720	0.13281	0.25476
721	0.12884	0.25116
722	0.12635	0.25065
723	0.12238	0.24924
724	0.1199	0.24563
725	0.11593	0.2402
726	0.11493	0.23527
727	0.11096	0.23241
728	0.10996	0.22851
729	0.10599	0.2247
730	0.1035	0.22093
731	0.1025	0.21636
732	0.09853	0.21497
733	0.09753	0.21145
734	0.09356	0.20764
735	0.09108	0.20599
736	0.08859	0.20173
737	0.08759	0.19854
738	0.0866	0.19603
739	0.08411	0.19347
740	0.08014	0.19312
741	0.07765	0.18893
742	0.07666	0.18199
743	0.07417	0.18016
744	0.07169	0.17764
745	0.07069	0.17923
746	0.0682	0.17991
747	0.0672	0.17822
748	0.06472	0.17424
749	0.06372	0.16924
750	0.06124	0.16354
751	0.05726	0.15999
752	0.05775	0.15821
753	0.05378	0.15556
754	0.05427	0.15495
755	0.05327	0.15135
756	0.05078	0.14776
757	0.04979	0.14087
758	0.04879	0.13904
759	0.04482	0.13694
760	0.0453	0.13487
761	0.04431	0.13083
762	0.04033	0.13007
763	0.04231	0.12797
764	0.03982	0.12798
765	0.03734	0.12585
766	0.03485	0.11848
767	0.03534	0.11696
768	0.03434	0.11777
769	0.03186	0.11458
770	0.03234	0.11049
771	0.02986	0.1064
772	0.02886	0.10481
773	0.02786	0.10564
774	0.02835	0.10674
775	0.02587	0.10179
776	0.02338	0.09891
777	0.02684	0.09869
778	0.02287	0.10129
779	0.02336	0.10241
780	0.02236	0.0986
781	0.01987	0.09369
782	0.02185	0.09191
783	0.01936	0.09294
784	0.01688	0.09312
785	0.01736	0.09136
786	0.01637	0.09658
787	0.01834	0.09593
788	0.01586	0.0951
789	0.01486	0.09129
790	0.01237	0.08812
791	0.01435	0.0848
792	0.01335	0.08261
793	0.01235	0.08078
794	0.00986	0.0792
795	0.01035	0.07961
796	0.01232	0.07979
797	0.00984	0.08113
798	0.00884	0.07868
799	0.01081	0.07702
800	0.00833	0.07773
801	0.00882	0.0735
802	0.00931	0.07026
803	0.00831	0.068
804	0.00879	0.07084
805	0.00631	0.0723
806	0.00828	0.0728
807	0.0058	0.07216
808	0.0048	0.06972
809	0.00677	0.06649
810	0.00577	0.06948
811	0.00478	0.06733
812	0.00526	0.06806
813	0.00575	0.06691
814	0.00624	0.06462
815	0.00524	0.06446
816	0.00573	0.066
817	0.00324	0.0655
818	0.00522	0.06541
819	0.0057	0.0584
820	0.00619	0.05521
821	0.00222	0.06094
822	0.00122	0.06072
823	0.00468	0.05814
824	0.00368	0.06015
825	0.00417	0.05885
826	0.00614	0.05974
827	0.00366	0.05548
828	0.00415	0.05431
829	0.00463	0.05475
830	0.00512	0.05446
831	0.00264	0.05695
832	0.00461	0.05135
833	0.00361	0.04673
834	0.00707	0.04544
835	0.00459	0.04706
836	0.00508	0.04908
837	0.00556	0.04877
838	0.00605	0.04384
839	0.00654	0.04785
840	0.00703	0.0496
841	0.00305	0.04467
842	0.00651	0.04531
843	0.00552	0.0455
844	0.006	0.04556
845	0.00946	0.04586
846	0.00846	0.04607
847	0.00895	0.04095
848	0.00944	0.04098
849	0.00993	0.03958
850	0.00744	0.04209
851	0.01239	0.03962
852	0.00842	0.0434
853	0.00891	0.04432
854	0.01088	0.04119
855	0.01137	0.04022
856	0.01483	0.03452
857	0.01234	0.0351
858	0.01432	0.03133
859	0.01183	0.0321
860	0.01476	0.03413
861	0.01302	0.03292
862	0.01277	0.03004
863	0.01252	0.03238
864	0.00781	0.03514
865	0.01648	0.02613
866	0.01325	0.03102
867	0.013	0.0239
868	0.01275	0.02826
869	0.0125	0.02663
870	0.01225	0.02709
871	0.01051	0.02659
872	0.01323	0.03209
873	0.01001	0.02972
874	0.00827	0.02621
875	0.01397	0.02399
876	0.01669	0.02792
877	0.01644	0.02553
878	0.00578	0.03121
879	0.01445	0.02467
880	0.01122	0.03224
881	0.008	0.03284
882	0.01667	0.03113
883	0.00898	0.03536
884	0.01319	0.02791
885	0.00997	0.02144
886	0.00972	0.03207
887	0.00798	0.03381
888	0.000295003	0.03028
889	0.00896	0.02757
890	0.01317	0.03208
891	0.00846	0.02645
892	0.01267	0.02523
893	0.01539	0.02406
894	0.01811	0.02474
895	0.00745	0.02982
896	0.01761	0.02676
897	0.0129	0.01269
898	0.01562	0.01476
899	0.01834	0.01597
900	0.00322	0.02622
901	0.01338	0.0207
902	0.00867	0.02493
903	0.01882	0.02095
904	0.0156	0.01899
905	0.01386	0.01832
906	0.01658	0.01337
907	0.01187	0.01627
908	0.01905	0.0119
909	0.01285	0.01312
910	0.01409	0.01957
911	0.01384	0.0212
912	0.01507	0.01881
913	0.01779	0.01837
914	0.01308	0.01899
915	0.01283	0.02141
916	0.01258	0.02296
917	0.01679	0.02368
918	0.01654	0.02263
919	0.01629	0.01628
920	0.01603	0.01919
921	0.0143	0.01783
922	0.0185	0.02004
923	0.01974	0.0159
924	0.018	0.01439
925	0.01626	0.01484
926	0.01898	0.01505
927	0.01576	0.01576
928	0.02145	0.01877
929	0.01972	0.02135
930	0.01766	0.01767
931	0.0181	0.01541
932	0.01853	0.01421
933	0.01897	0.01182
934	0.0194	0.01757
935	0.01538	0.02217
936	0.01581	0.01907
937	0.01625	0.01384
938	0.01817	0.01302
939	0.01563	0.0106
940	0.01458	0.01413
941	0.01501	0.01294
942	0.01693	0.01565
943	0.01588	0.01673
944	0.01483	0.014
945	0.01378	0.01295
946	0.01421	0.01318
947	0.01613	0.01568
948	0.01211	0.01415
949	0.01254	0.01615
950	0.01595	0.021
951	0.01044	0.02111
952	0.01236	0.01897
953	0.00982	0.0195
954	0.01026	0.0176
955	0.01366	0.01683
956	0.01261	0.0172
957	0.01156	0.01987
958	0.00754	0.02029
959	0.01094	0.01959
960	0.00989	0.02062
961	0.00587	0.01842
962	0.00928	0.01945
963	0.00971	0.02031
964	0.01014	0.02318
965	0.00761	0.02521
966	0.00953	0.02046
967	0.00848	0.01888
968	0.00445	0.02023
969	0.00786	0.02127
970	0.00681	0.01918
971	0.00873	0.02192
972	0.01065	0.01949
973	0.00811	0.02333
974	0.00854	0.02237
975	0.00601	0.02433
976	0.00941	0.02162
977	0.00836	0.01738
978	0.00582	0.01966
979	0.00626	0.01676
980	0.00818	0.0111
981	0.00564	0.01441
982	0.00905	0.01516
983	0.00502	0.02062
984	0.00249	0.0192
985	0.00887	0.0186
986	0.0093	0.01571
987	0.00676	0.01428
988	0.00571	0.01498
989	0.00763	0.01765
990	0.00807	0.0161
991	0.00553	0.01959
992	0.00596	0.02013
993	0.0064	0.01956
994	0.00386	0.01622
995	0.00429	0.01712
996	0.00473	0.01189
997	0.00516	0.01186
998	0.0056	0.01397
999	0.00455	0.02028
1000	0.00349	0.0204
1001	0.00244	0.02145
1002	0.00436	0.01956
1003	0.00331	0.01556
1004	0.00375	0.01359
1005	0.00567	0.01347
1006	0.00462	0.01229
1007	0.00356	0.01696
1008	0.004	0.01653
1009	0.00443	0.01854
1010	0.00338	0.01893
1011	0.0053	0.01533
1012	0.00276	0.01462
1013	0.0032	0.01509
1014	0.00512	0.01617
1015	0.00258	0.01845
1016	0.00302	0.02044
1017	0.00494	0.01862
1018	0.00389	0.02279
1019	0.00432	0.02105
1020	0.00327	0.01964
1021	0.0037	0.01493
1022	0.00265	0.0145
1023	0.0016	0.01445
1024	0.00352	0.02027
1025	0.00395	0.01898
1026	0.00439	0.0192
1027	0.00334	0.01848
1028	0.00377	0.0148
1029	0.00123	0.01932
1030	0.00316	0.02089
1031	0.0021	0.02034
1032	0.00551	0.01861
1033	0	0.01704
1034	0.00341	0.01815
1035	0.00236	0.0202
1036	0.0013	0.02309
1037	0.00174	0.02413
1038	0.000686536	0.02213
1039	0.00261	0.02337
1040	0.00304	0.02462
1041	0.00199	0.02787
1042	0.00242	0.02659
1043	0.00137	0.02533
1044	0.00181	0.02495
1045	0.00373	0.02369
1046	0.00268	0.02164
1047	0.00311	0.01962
1048	0.00206	0.0185
1049	0.00249	0.01845
1050	0.00293	0.01804
1051	0.00336	0.01974
1052	0.00231	0.02329
1053	0.00126	0.02392
1054	0.00169	0.0228
1055	0.00213	0.02378
1056	0.00405	0.01954
1057	0.00448	0.02031
1058	0.00343	0.01869
1059	0.00238	0.02054
1060	0.00133	0.02239
1061	0.00474	0.02123
1062	0.0022	0.02207
1063	0.00561	0.01989
1064	0.00455	0.02172
1065	0.0035	0.02254
1066	0.00542	0.02335
1067	0.00288	0.02215
1068	0.00332	0.01994
1069	0.00078159	0.01973
1070	0.00419	0.02052
1071	0.00314	0.0213
1072	0.00209	0.02108
1073	0.00252	0.01984
1074	0.00444	0.0196
1075	0.00339	0.02136
1076	0.0068	0.02011
1077	0.00426	0.02085
1078	0.00321	0.01858
1079	0.00215	0.01831
1080	0.00408	0.01904
1081	0.00451	0.01776
1082	0.00346	0.01747
1083	0.00389	0.01918
1084	0.00581	0.01687
1085	0.00476	0.01757
1086	0.0052	0.01726
1087	0.00712	0.01794
1088	0.00607	0.01762
1089	0.00501	0.01628
1090	0.00396	0.01394
1091	0.00588	0.0136
1092	0.00483	0.01225
1093	0.00527	0.0139
1094	0.00421	0.01354
1095	0.00614	0.01517
1096	0.00657	0.0158
1097	0.00552	0.01642
1098	0.00595	0.01303
1099	0.0049	0.01364
1100	0.00682	0.00924

## Sheet: fig 2b
239	0.97005	0.97767
240	0.96672	0.96888
241	0.97005	0.9797
242	0.96672	0.97226
243	0.96339	0.97023
244	0.96839	0.98309
245	0.97338	0.97023
246	0.96672	0.97564
247	0.97338	0.97158
248	0.98003	0.98512
249	0.96672	0.98444
250	0.97504	0.98647
251	0.97338	0.97903
252	0.97671	0.98241
253	0.97171	0.97632
254	0.99002	0.98782
255	0.98336	0.99323
256	0.98835	0.99188
257	0.98669	0.9885
258	0.98336	0.99053
259	0.98669	0.99391
260	0.99002	0.99053
261	0.99168	0.99526
262	0.99667	0.98985
263	0.99334	0.99323
264	0.99168	0.99865
265	0.99667	0.9885
266	0.99168	0.99932
267	0.99501	0.99188
268	0.99501	1
269	1	0.99323
270	1	0.99594
271	0.99501	0.99391
272	0.99667	0.98917
273	0.99334	0.99323
274	0.99501	0.99662
275	0.99334	0.97361
276	0.98336	0.98917
277	0.99667	0.99053
278	0.98502	0.99594
279	0.98669	0.99053
280	0.9817	0.97767
281	0.97338	0.99053
282	0.9817	0.98782
283	0.97837	0.98241
284	0.97171	0.98782
285	0.97005	0.9797
286	0.96506	0.977
287	0.96672	0.97564
288	0.96506	0.97091
289	0.95674	0.96076
290	0.95175	0.96955
291	0.94509	0.96685
292	0.94343	0.96008
293	0.93178	0.96076
294	0.93344	0.96617
295	0.91015	0.94384
296	0.90682	0.94181
297	0.89684	0.92896
298	0.89517	0.92963
299	0.89517	0.92287
300	0.88186	0.9249
301	0.87521	0.92016
302	0.87022	0.91813
303	0.87354	0.91543
304	0.86023	0.91137
305	0.85358	0.88498
306	0.85191	0.88566
307	0.82529	0.91543
308	0.84859	0.88972
309	0.8386	0.91813
310	0.78203	0.91272
311	0.81864	0.89107
312	0.80366	0.84709
313	0.84193	0.89648
314	0.82363	0.88972
315	0.81198	0.88227
316	0.80033	0.88092
317	0.82196	0.87348
318	0.80532	0.87889
319	0.81864	0.87957
320	0.77371	0.86806
321	0.80366	0.86265
322	0.79867	0.85927
323	0.80366	0.8613
324	0.7421	0.8295
325	0.76373	0.83153
326	0.76705	0.85183
327	0.74043	0.83559
328	0.73045	0.84641
329	0.70216	0.80379
330	0.7188	0.81055
331	0.71381	0.79026
332	0.70383	0.78146
333	0.67388	0.79567
334	0.69052	0.78823
335	0.68053	0.76928
336	0.66556	0.76319
337	0.65724	0.73681
338	0.65058	0.74966
339	0.6406	0.75169
340	0.64226	0.72936
341	0.64393	0.73072
342	0.63727	0.71448
343	0.62895	0.71854
344	0.59567	0.70501
345	0.60566	0.68674
346	0.61065	0.69215
347	0.60566	0.66171
348	0.599	0.67997
349	0.58569	0.66171
350	0.57238	0.64817
351	0.56739	0.63532
352	0.5574	0.63261
353	0.56073	0.61637
354	0.55574	0.60758
355	0.54742	0.59946
356	0.53744	0.58187
357	0.53577	0.57375
358	0.53577	0.57172
359	0.52745	0.55074
360	0.52413	0.54939
361	0.51414	0.53315
362	0.51082	0.52097
363	0.50915	0.51962
364	0.50416	0.51015
365	0.49584	0.49797
366	0.49418	0.49256
367	0.48419	0.4797
368	0.48918	0.47767
369	0.47587	0.46888
370	0.46256	0.46143
371	0.47421	0.45467
372	0.47255	0.45061
373	0.4609	0.44587
374	0.45424	0.43978
375	0.45258	0.43708
376	0.44925	0.43099
377	0.44759	0.42693
378	0.44426	0.42355
379	0.44093	0.41813
380	0.43927	0.41543
381	0.43428	0.41543
382	0.43261	0.41001
383	0.43095	0.40731
384	0.42429	0.40325
385	0.42263	0.40392
386	0.42263	0.39986
387	0.41597	0.39716
388	0.41764	0.39648
389	0.41098	0.39175
390	0.41098	0.39175
391	0.41098	0.38701
392	0.40765	0.38566
393	0.40433	0.3843
394	0.401	0.3816
395	0.40266	0.37957
396	0.401	0.37889
397	0.39601	0.37618
398	0.39101	0.37415
399	0.39268	0.37415
400	0.38935	0.3728
401	0.38602	0.37077
402	0.38602	0.36874
403	0.3827	0.36739
404	0.37937	0.36536
405	0.37937	0.36265
406	0.3777	0.36265
407	0.3777	0.36198
408	0.37105	0.35724
409	0.37105	0.35792
410	0.36938	0.35453
411	0.36938	0.35521
412	0.36606	0.3525
413	0.36439	0.3525
414	0.3594	0.34912
415	0.35774	0.34709
416	0.35607	0.34641
417	0.35441	0.34574
418	0.34942	0.34235
419	0.35108	0.34303
420	0.34942	0.34168
421	0.34609	0.34032
422	0.34443	0.33829
423	0.34276	0.33627
424	0.3411	0.33627
425	0.3411	0.33491
426	0.33777	0.33424
427	0.33777	0.33356
428	0.33611	0.33085
429	0.33278	0.33018
430	0.33111	0.32882
431	0.33278	0.32882
432	0.32945	0.32747
433	0.32612	0.32544
434	0.32446	0.32409
435	0.32113	0.32273
436	0.32113	0.32138
437	0.31947	0.32003
438	0.3178	0.31867
439	0.3178	0.318
440	0.31448	0.31529
441	0.31448	0.31529
442	0.31281	0.31394
443	0.30948	0.31258
444	0.30948	0.31123
445	0.30616	0.31055
446	0.30449	0.30988
447	0.30283	0.30853
448	0.30283	0.30785
449	0.30116	0.3065
450	0.30116	0.30582
451	0.29784	0.30379
452	0.29617	0.30379
453	0.29784	0.30244
454	0.29617	0.30108
455	0.29285	0.29973
456	0.29118	0.29905
457	0.28952	0.29838
458	0.28785	0.29702
459	0.28619	0.29567
460	0.28619	0.29499
461	0.28286	0.29364
462	0.28286	0.29229
463	0.28286	0.29161
464	0.2812	0.29161
465	0.27953	0.28958
466	0.27787	0.28823
467	0.27787	0.28755
468	0.27621	0.28687
469	0.27288	0.28552
470	0.27288	0.28484
471	0.27288	0.28417
472	0.26955	0.28281
473	0.26622	0.28078
474	0.26789	0.28078
475	0.26789	0.28011
476	0.26622	0.27876
477	0.2629	0.27808
478	0.2629	0.27673
479	0.26123	0.27537
480	0.2579	0.2747
481	0.25957	0.27402
482	0.25624	0.27267
483	0.25624	0.27199
484	0.25458	0.26996
485	0.25291	0.26996
486	0.25458	0.26861
487	0.25291	0.26793
488	0.25125	0.26658
489	0.24958	0.2659
490	0.24958	0.26522
491	0.24792	0.26387
492	0.24626	0.26387
493	0.24626	0.26252
494	0.24459	0.26184
495	0.24293	0.26049
496	0.24126	0.25913
497	0.2396	0.25913
498	0.2396	0.25846
499	0.23794	0.2571
500	0.23627	0.25575
501	0.23627	0.25575
502	0.23461	0.2544
503	0.23461	0.25372
504	0.23295	0.25237
505	0.23128	0.25169
506	0.23128	0.25101
507	0.23128	0.25034
508	0.22962	0.24899
509	0.22795	0.24763
510	0.22795	0.24763
511	0.22629	0.24628
512	0.22629	0.24628
513	0.22463	0.24493
514	0.22296	0.24357
515	0.2213	0.2429
516	0.2213	0.24222
517	0.2213	0.24154
518	0.21963	0.24019
519	0.21631	0.23884
520	0.21631	0.23951
521	0.21464	0.23816
522	0.21464	0.23681
523	0.21464	0.23545
524	0.21298	0.23478
525	0.21298	0.23478
526	0.21131	0.2341
527	0.21131	0.23342
528	0.20799	0.23207
529	0.20799	0.23139
530	0.20799	0.23004
531	0.20632	0.22936
532	0.20632	0.22869
533	0.20466	0.22733
534	0.203	0.22733
535	0.203	0.22598
536	0.203	0.2253
537	0.20133	0.2253
538	0.20133	0.2253
539	0.20133	0.22327
540	0.19967	0.22327
541	0.19967	0.22192
542	0.198	0.22192
543	0.198	0.22057
544	0.19468	0.21922
545	0.19468	0.21922
546	0.19468	0.21786
547	0.19301	0.21719
548	0.19301	0.21651
549	0.19135	0.21651
550	0.19135	0.21516
551	0.18968	0.21516
552	0.18802	0.21313
553	0.18968	0.21313
554	0.18802	0.21177
555	0.18636	0.2111
556	0.18469	0.21042
557	0.18469	0.20907
558	0.18469	0.20839
559	0.18469	0.20839
560	0.18303	0.20704
561	0.18303	0.20636
562	0.1797	0.20568
563	0.1797	0.20568
564	0.1797	0.20433
565	0.1797	0.20365
566	0.17637	0.20298
567	0.17637	0.2023
568	0.17471	0.20095
569	0.17637	0.20027
570	0.17471	0.20027
571	0.17304	0.19959
572	0.17304	0.19824
573	0.17138	0.19756
574	0.17138	0.19689
575	0.17138	0.19621
576	0.16972	0.19553
577	0.16972	0.19486
578	0.16972	0.19418
579	0.16805	0.1935
580	0.16639	0.19215
581	0.16639	0.19215
582	0.16473	0.1908
583	0.16473	0.19012
584	0.16306	0.18945
585	0.16306	0.18877
586	0.16306	0.18809
587	0.1614	0.18742
588	0.1614	0.18674
589	0.15973	0.18606
590	0.15807	0.18539
591	0.15807	0.18471
592	0.15807	0.18403
593	0.15807	0.18336
594	0.15641	0.18268
595	0.15641	0.182
596	0.15474	0.18065
597	0.15474	0.18065
598	0.15474	0.17997
599	0.15308	0.1793
600	0.15141	0.17794
601	0.14975	0.17794
602	0.15141	0.17659
603	0.14975	0.17591
604	0.14975	0.17524
605	0.14975	0.17456
606	0.14809	0.17456
607	0.14809	0.17388
608	0.14642	0.17321
609	0.14642	0.17185
610	0.14476	0.17118
611	0.14476	0.1705
612	0.14476	0.16982
613	0.14309	0.16915
614	0.14309	0.16847
615	0.14143	0.16779
616	0.14143	0.16712
617	0.13977	0.16644
618	0.13977	0.16576
619	0.13977	0.16576
620	0.13977	0.16509
621	0.1381	0.16373
622	0.1381	0.16373
623	0.1381	0.16306
624	0.13644	0.16238
625	0.13478	0.16171
626	0.13644	0.16103
627	0.13478	0.16103
628	0.13478	0.15968
629	0.13311	0.159
630	0.13311	0.15832
631	0.13311	0.15832
632	0.13145	0.15765
633	0.12978	0.15629
634	0.13145	0.15629
635	0.12978	0.15562
636	0.12812	0.15426
637	0.12812	0.15359
638	0.12646	0.15291
639	0.12812	0.15291
640	0.12812	0.15223
641	0.12646	0.15156
642	0.12479	0.15088
643	0.12479	0.1502
644	0.12479	0.1502
645	0.12313	0.14885
646	0.12313	0.14885
647	0.12313	0.14817
648	0.12146	0.14817
649	0.12146	0.14682
650	0.12146	0.14614
651	0.12146	0.14547
652	0.1198	0.14547
653	0.1198	0.14479
654	0.11814	0.14344
655	0.1198	0.14411
656	0.11814	0.14276
657	0.1198	0.14276
658	0.11814	0.14141
659	0.11647	0.14141
660	0.11647	0.14073
661	0.11481	0.14005
662	0.11647	0.14005
663	0.11481	0.13938
664	0.11314	0.1387
665	0.11314	0.13802
666	0.11314	0.13802
667	0.11314	0.13735
668	0.11314	0.13735
669	0.11148	0.13667
670	0.11148	0.13532
671	0.10982	0.13532
672	0.10982	0.13464
673	0.10815	0.13396
674	0.10982	0.13329
675	0.10815	0.13261
676	0.10815	0.13194
677	0.10815	0.13126
678	0.10815	0.13126
679	0.10815	0.12991
680	0.10649	0.12991
681	0.10483	0.12923
682	0.10483	0.12855
683	0.10483	0.12788
684	0.10483	0.12788
685	0.10316	0.1272
686	0.10316	0.1272
687	0.1015	0.12652
688	0.1015	0.12585
689	0.1015	0.12517
690	0.1015	0.12449
691	0.10316	0.12449
692	0.09983	0.12382
693	0.09983	0.12314
694	0.09983	0.12314
695	0.09817	0.12179
696	0.09817	0.12111
697	0.09983	0.12179
698	0.09817	0.12111
699	0.09651	0.11976
700	0.09651	0.11908
701	0.09651	0.11908
702	0.09651	0.1184
703	0.09651	0.11773
704	0.09651	0.11773
705	0.09484	0.11637
706	0.09318	0.1157
707	0.09484	0.11637
708	0.09318	0.11502
709	0.09484	0.11434
710	0.09318	0.11434
711	0.09318	0.11367
712	0.09151	0.11367
713	0.09151	0.11299
714	0.08985	0.11231
715	0.09151	0.11096
716	0.09151	0.11164
717	0.08985	0.11028
718	0.09151	0.11028
719	0.08985	0.10893
720	0.08819	0.10893
721	0.08985	0.10825
722	0.08652	0.10758
723	0.08819	0.10622
724	0.08819	0.10622
725	0.08819	0.10555
726	0.08652	0.10555
727	0.08652	0.10487
728	0.08652	0.10487
729	0.08652	0.10352
730	0.08486	0.10352
731	0.08652	0.10284
732	0.08486	0.10284
733	0.08486	0.10149
734	0.08486	0.10149
735	0.08319	0.10081
736	0.08153	0.10014
737	0.08319	0.09946
738	0.08319	0.10014
739	0.08153	0.09878
740	0.08153	0.09743
741	0.08153	0.09675
742	0.07987	0.09675
743	0.08153	0.09608
744	0.07987	0.09608
745	0.08153	0.0954
746	0.07987	0.0954
747	0.0782	0.09472
748	0.07987	0.09472
749	0.0782	0.09405
750	0.0782	0.09269
751	0.07654	0.09269
752	0.07654	0.09269
753	0.07654	0.09134
754	0.07654	0.09134
755	0.07654	0.09066
756	0.07654	0.08931
757	0.07654	0.08931
758	0.07488	0.08863
759	0.07488	0.08796
760	0.07488	0.08728
761	0.07321	0.0866
762	0.07321	0.08593
763	0.07488	0.08593
764	0.07321	0.08457
765	0.07155	0.08457
766	0.07155	0.0839
767	0.06988	0.08322
768	0.06988	0.08254
769	0.06988	0.08322
770	0.06988	0.08187
771	0.06988	0.08187
772	0.06988	0.08119
773	0.06988	0.08119
774	0.06822	0.07984
775	0.06822	0.07984
776	0.06822	0.07984
777	0.06822	0.07984
778	0.06822	0.07848
779	0.06489	0.07781
780	0.06822	0.07848
781	0.06656	0.07781
782	0.06656	0.07713
783	0.06489	0.07645
784	0.06489	0.07645
785	0.06489	0.07645
786	0.06489	0.07442
787	0.06489	0.0751
788	0.06489	0.07442
789	0.06489	0.07375
790	0.06323	0.07307
791	0.06323	0.07307
792	0.06323	0.0724
793	0.06156	0.07307
794	0.06323	0.07172
795	0.06323	0.07104
796	0.06323	0.07104
797	0.06156	0.06969
798	0.0599	0.06901
799	0.0599	0.07037
800	0.0599	0.06901
801	0.0599	0.06834
802	0.0599	0.06834
803	0.0599	0.06901
804	0.05824	0.06698
805	0.0599	0.06698
806	0.0599	0.06698
807	0.05657	0.06563
808	0.05824	0.06631
809	0.05824	0.06563
810	0.05657	0.06495
811	0.05657	0.06495
812	0.05491	0.06428
813	0.05491	0.06428
814	0.05491	0.0636
815	0.05491	0.06225
816	0.05491	0.06292
817	0.05657	0.06225
818	0.05657	0.06225
819	0.05491	0.06225
820	0.05491	0.06157
821	0.05324	0.06022
822	0.05324	0.06022
823	0.05324	0.05954
824	0.05158	0.05954
825	0.05324	0.05886
826	0.05324	0.05954
827	0.04992	0.05751
828	0.05158	0.05751
829	0.04992	0.05683
830	0.05324	0.05819
831	0.04825	0.05616
832	0.04992	0.05616
833	0.04992	0.05616
834	0.05158	0.05751
835	0.04825	0.05548
836	0.04992	0.05548
837	0.04825	0.0548
838	0.04825	0.05548
839	0.04825	0.05413
840	0.04659	0.05413
841	0.04825	0.05345
842	0.04659	0.05345
843	0.04659	0.05345
844	0.04659	0.0521
845	0.04659	0.05345
846	0.04825	0.05277
847	0.04493	0.05142
848	0.04659	0.05277
849	0.04659	0.05142
850	0.04326	0.05074
851	0.04659	0.05007
852	0.04326	0.04939
853	0.04326	0.04939
854	0.04493	0.04871
855	0.04326	0.04939
856	0.04493	0.04871
857	0.04493	0.04736
858	0.04493	0.04804
859	0.0416	0.04804
860	0.04493	0.04804
861	0.0416	0.04736
862	0.04326	0.04601
863	0.04493	0.04601
864	0.03661	0.0433
865	0.04493	0.04668
866	0.03993	0.04398
867	0.04493	0.0433
868	0.03993	0.04533
869	0.0416	0.04533
870	0.0416	0.04601
871	0.03827	0.0433
872	0.03827	0.04127
873	0.03661	0.04263
874	0.03494	0.0406
875	0.03993	0.0433
876	0.03993	0.04263
877	0.04326	0.0433
878	0.03328	0.03789
879	0.04326	0.04195
880	0.03494	0.04127
881	0.03661	0.03992
882	0.04326	0.03857
883	0.03494	0.03857
884	0.03661	0.04465
885	0.03827	0.03992
886	0.03661	0.03992
887	0.02662	0.03789
888	0.03161	0.03857
889	0.02995	0.03721
890	0.03661	0.03518
891	0.03993	0.03992
892	0.03827	0.03789
893	0.04825	0.0433
894	0.04493	0.03992
895	0.02662	0.03721
896	0.02995	0.03721
897	0.03328	0.03789
898	0.0416	0.04195
899	0.03827	0.0406
900	0.02496	0.03721
901	0.03827	0.03789
902	0.03661	0.03924
903	0.03827	0.0406
904	0.03827	0.04263
905	0.03494	0.0406
906	0.03827	0.0433
907	0.03494	0.04127
908	0.03827	0.0406
909	0.03827	0.0406
910	0.03661	0.0406
911	0.03661	0.0406
912	0.03494	0.0406
913	0.03661	0.0406
914	0.03661	0.03789
915	0.03494	0.03857
916	0.03661	0.04127
917	0.03494	0.03924
918	0.03494	0.03721
919	0.03661	0.03924
920	0.03494	0.03789
921	0.03328	0.03586
922	0.03328	0.03789
923	0.03328	0.03721
924	0.03161	0.03586
925	0.03328	0.03654
926	0.03328	0.03721
927	0.03328	0.03654
928	0.03494	0.03586
929	0.02995	0.03654
930	0.02995	0.03586
931	0.02995	0.03586
932	0.02995	0.03654
933	0.03494	0.03586
934	0.03161	0.03451
935	0.02995	0.03383
936	0.03161	0.03518
937	0.03161	0.03518
938	0.03328	0.03586
939	0.03161	0.03451
940	0.02995	0.03518
941	0.02995	0.03248
942	0.02995	0.03451
943	0.02829	0.03451
944	0.03161	0.03518
945	0.02995	0.03315
946	0.03161	0.03451
947	0.02662	0.03315
948	0.02829	0.03383
949	0.02995	0.03315
950	0.03328	0.03451
951	0.02662	0.03383
952	0.02995	0.03315
953	0.02829	0.03315
954	0.02662	0.03383
955	0.02995	0.03518
956	0.02829	0.03586
957	0.02829	0.03451
958	0.02662	0.03586
959	0.02829	0.03518
960	0.02829	0.03518
961	0.02662	0.0318
962	0.02995	0.03248
963	0.02662	0.03383
964	0.02662	0.03315
965	0.02662	0.0318
966	0.02829	0.03248
967	0.02829	0.03112
968	0.02662	0.03248
969	0.02496	0.0318
970	0.02329	0.03248
971	0.02662	0.03045
972	0.02662	0.03248
973	0.02662	0.0318
974	0.02329	0.0318
975	0.02329	0.02909
976	0.02662	0.03045
977	0.02496	0.02977
978	0.02496	0.02842
979	0.02329	0.02842
980	0.02496	0.03045
981	0.02163	0.02842
982	0.02496	0.02909
983	0.02163	0.02842
984	0.02496	0.02503
985	0.02496	0.02706
986	0.02163	0.02571
987	0.02163	0.02436
988	0.01997	0.02571
989	0.02163	0.02639
990	0.02496	0.02639
991	0.02329	0.02436
992	0.01997	0.02436
993	0.02163	0.02503
994	0.02329	0.02503
995	0.01997	0.02233
996	0.02163	0.02436
997	0.02329	0.02436
998	0.02163	0.023
999	0.01997	0.02165
1000	0.0183	0.023
1001	0.01997	0.02097
1002	0.0183	0.02097
1003	0.0183	0.0203
1004	0.0183	0.02165
1005	0.0183	0.0203
1006	0.0183	0.0203
1007	0.01664	0.01827
1008	0.01997	0.01962
1009	0.01664	0.01827
1010	0.01997	0.01759
1011	0.0183	0.01759
1012	0.01664	0.01759
1013	0.01498	0.01827
1014	0.0183	0.01759
1015	0.01664	0.01624
1016	0.01498	0.01624
1017	0.01664	0.01624
1018	0.01498	0.01556
1019	0.01498	0.01556
1020	0.01664	0.01488
1021	0.01664	0.01488
1022	0.01498	0.01421
1023	0.01165	0.01421
1024	0.01331	0.01286
1025	0.01331	0.01421
1026	0.01498	0.01286
1027	0.01331	0.01218
1028	0.01498	0.01353
1029	0.01498	0.01286
1030	0.01498	0.01218
1031	0.01165	0.01218
1032	0.01331	0.01083
1033	0.01331	0.01015
1034	0.01331	0.0115
1035	0.01331	0.01083
1036	0.01165	0.01015
1037	0.00998	0.0088
1038	0.01165	0.0088
1039	0.01165	0.00947
1040	0.00998	0.0088
1041	0.00998	0.0088
1042	0.01165	0.0088
1043	0.00832	0.00744
1044	0.00998	0.00812
1045	0.00998	0.00812
1046	0.00998	0.00812
1047	0.00832	0.00744
1048	0.00832	0.00677
1049	0.00832	0.00677
1050	0.00832	0.00541
1051	0.00998	0.00677
1052	0.00832	0.00541
1053	0.00832	0.00609
1054	0.00832	0.00474
1055	0.00666	0.00541
1056	0.00832	0.00541
1057	0.00832	0.00474
1058	0.00666	0.00406
1059	0.00832	0.00406
1060	0.00499	0.00338
1061	0.00832	0.00474
1062	0.00666	0.00406
1063	0.00832	0.00406
1064	0.00666	0.00338
1065	0.00666	0.00338
1066	0.00666	0.00338
1067	0.00666	0.00203
1068	0.00666	0.00406
1069	0.00499	0.00135
1070	0.00666	0.00271
1071	0.00499	0.00271
1072	0.00499	0.00135
1073	0.00499	0.00203
1074	0.00499	0.00135
1075	0.00499	0.00135
1076	0.00666	0.00203
1077	0.00499	0.00067659
1078	0.00333	0.00135
1079	0.00333	0.00067659
1080	0.00333	0.00067659
1081	0.00333	0.00135
1082	0.00166	0.00135
1083	0.00333	0.00067659
1084	0.00499	0.00135
1085	0.00499	0.00135
1086	0.00333	0
1087	0.00333	0.00067659
1088	0.00333	0.00067659
1089	0.00333	0
1090	0.00333	0.00135
1091	0	0.00067659
1092	0.00166	0
1093	0.00333	0.00067659
1094	0	0
1095	0.00166	0
1096	0.00166	0
1097	0.00166	0.00135
1098	0.00166	0
1099	0	0
1100	0.00333	0

## Sheet: fig 2c
239	0.92385	0.91908
240	0.93211	0.93148
241	0.94333	0.93562
242	0.93684	0.94507
243	0.92562	0.94448
244	0.93625	0.92912
245	0.92621	0.94389
246	0.93093	0.94743
247	0.93625	0.93798
248	0.94923	0.9433
249	0.94333	0.9557
250	0.94982	0.95452
251	0.95455	0.94743
252	0.96045	0.96161
253	0.96104	0.97224
254	0.96517	0.95688
255	0.96871	0.96397
256	0.96753	0.96515
257	0.9693	0.96279
258	0.97285	0.96515
259	0.98111	0.97224
260	0.98347	0.98228
261	0.98229	0.98051
262	0.98996	0.97106
263	0.97934	0.97342
264	0.99115	0.98051
265	0.99233	0.99173
266	0.99705	0.97874
267	0.98819	0.98464
268	0.99115	0.98346
269	0.99469	0.98582
270	0.99882	0.98523
271	0.99351	0.98701
272	0.99055	0.99527
273	0.99233	0.98701
274	1	1
275	0.9876	0.98878
276	0.98996	0.99114
277	0.99764	0.98819
278	0.9876	0.98582
279	0.98229	0.98346
280	0.98347	0.98464
281	0.98229	0.98346
282	0.98347	0.98228
283	0.98229	0.97578
284	0.97285	0.97165
285	0.96281	0.97106
286	0.9634	0.96869
287	0.95041	0.96869
288	0.94864	0.96929
289	0.94274	0.9622
290	0.93743	0.96102
291	0.93034	0.95393
292	0.92326	0.95747
293	0.91854	0.9433
294	0.91204	0.93975
295	0.90732	0.9368
296	0.89315	0.91967
297	0.88312	0.93916
298	0.88371	0.92499
299	0.87603	0.91553
300	0.87957	0.91258
301	0.86482	0.90608
302	0.85419	0.89841
303	0.84357	0.899
304	0.83412	0.88423
305	0.8353	0.886
306	0.81464	0.95806
307	0.81877	0.85942
308	0.79929	0.83284
309	0.84179	0.88364
310	0.83471	0.85115
311	0.79221	0.86828
312	0.78749	0.85233
313	0.78985	0.85056
314	0.7987	0.85588
315	0.77863	0.88659
316	0.77804	0.84229
317	0.768	0.81217
318	0.77922	0.82989
319	0.75797	0.81571
320	0.78453	0.79858
321	0.75207	0.84465
322	0.74144	0.8482
323	0.74439	0.84288
324	0.72609	0.82693
325	0.73259	0.80508
326	0.74144	0.8104
327	0.72727	0.81748
328	0.72491	0.79563
329	0.71074	0.80685
330	0.71665	0.77141
331	0.70307	0.77673
332	0.69185	0.76905
333	0.68772	0.78086
334	0.68595	0.75901
335	0.67651	0.79681
336	0.67296	0.76019
337	0.66765	0.76255
338	0.67001	0.772
339	0.66411	0.74483
340	0.6464	0.73952
341	0.6405	0.74897
342	0.6464	0.74956
343	0.63872	0.72652
344	0.64227	0.72475
345	0.62338	0.73243
346	0.62279	0.71412
347	0.6157	0.71294
348	0.60921	0.71648
349	0.61039	0.71234
350	0.61216	0.6964
351	0.60626	0.69876
352	0.60094	0.70171
353	0.59386	0.70348
354	0.59091	0.69699
355	0.58914	0.68813
356	0.58796	0.68458
357	0.58028	0.68576
358	0.57733	0.68636
359	0.58146	0.67159
360	0.57379	0.67159
361	0.56789	0.67631
362	0.56553	0.66332
363	0.56139	0.66745
364	0.5608	0.66332
365	0.55844	0.66273
366	0.55431	0.65387
367	0.5608	0.65623
368	0.54959	0.65269
369	0.54427	0.65269
370	0.54427	0.63733
371	0.53837	0.63497
372	0.54073	0.6391
373	0.53837	0.64737
374	0.53719	0.64206
375	0.53424	0.64146
376	0.53129	0.64146
377	0.52952	0.63969
378	0.52656	0.63733
379	0.52538	0.63615
380	0.5242	0.63201
381	0.52243	0.63142
382	0.51948	0.62729
383	0.51653	0.62847
384	0.51535	0.62611
385	0.51358	0.62315
386	0.51122	0.62374
387	0.50885	0.62197
388	0.5059	0.6202
389	0.5059	0.61429
390	0.50295	0.61725
391	0.50177	0.61488
392	0.49941	0.6137
393	0.49882	0.61193
394	0.49587	0.60957
395	0.49528	0.61075
396	0.49351	0.60602
397	0.49292	0.60484
398	0.48878	0.60484
399	0.4876	0.59835
400	0.48583	0.60248
401	0.48524	0.59776
402	0.48347	0.59539
403	0.48111	0.59539
404	0.47816	0.59303
405	0.47757	0.59303
406	0.47639	0.59244
407	0.47403	0.5883
408	0.47226	0.58594
409	0.4693	0.58535
410	0.46812	0.58476
411	0.46812	0.58417
412	0.46517	0.57885
413	0.46458	0.57944
414	0.46222	0.57944
415	0.45927	0.5759
416	0.45986	0.57413
417	0.45691	0.57295
418	0.45573	0.57177
419	0.45573	0.57058
420	0.45218	0.57058
421	0.451	0.56881
422	0.44982	0.56586
423	0.44805	0.56468
424	0.44746	0.5635
425	0.44628	0.56113
426	0.44392	0.56054
427	0.44333	0.55877
428	0.44215	0.55582
429	0.43979	0.55582
430	0.4392	0.55464
431	0.43802	0.55346
432	0.43625	0.55168
433	0.43447	0.5505
434	0.43388	0.54932
435	0.43211	0.54814
436	0.43034	0.54637
437	0.42916	0.5446
438	0.42857	0.544
439	0.42739	0.54282
440	0.42503	0.54046
441	0.42562	0.54046
442	0.42385	0.5381
443	0.42208	0.53869
444	0.42149	0.53692
445	0.41972	0.53514
446	0.41913	0.53396
447	0.41795	0.53219
448	0.41617	0.53101
449	0.41499	0.53042
450	0.41381	0.53042
451	0.41322	0.52865
452	0.41204	0.52688
453	0.41086	0.52747
454	0.40968	0.52569
455	0.40909	0.52333
456	0.4085	0.52333
457	0.40614	0.52215
458	0.40555	0.5192
459	0.40496	0.51979
460	0.40437	0.51861
461	0.40319	0.51742
462	0.40201	0.51802
463	0.40142	0.51624
464	0.39906	0.51624
465	0.40024	0.51506
466	0.39847	0.51506
467	0.39906	0.51506
468	0.39728	0.51506
469	0.39728	0.5127
470	0.39551	0.51211
471	0.39492	0.5127
472	0.39492	0.51152
473	0.39433	0.51211
474	0.39374	0.5127
475	0.39433	0.51093
476	0.39374	0.51152
477	0.39374	0.5127
478	0.39315	0.51211
479	0.39315	0.51211
480	0.39433	0.51211
481	0.39433	0.51506
482	0.39374	0.51506
483	0.39492	0.51683
484	0.39551	0.51683
485	0.39492	0.51802
486	0.39669	0.52038
487	0.39728	0.52215
488	0.39906	0.52333
489	0.39965	0.52628
490	0.40083	0.52747
491	0.40201	0.53101
492	0.40319	0.53219
493	0.40496	0.53574
494	0.40732	0.53869
495	0.40909	0.54223
496	0.41086	0.54578
497	0.41381	0.5505
498	0.41558	0.55464
499	0.41913	0.55818
500	0.42149	0.56291
501	0.42444	0.56763
502	0.42739	0.57236
503	0.43152	0.57767
504	0.43447	0.58299
505	0.43743	0.58771
506	0.44215	0.59362
507	0.44569	0.60012
508	0.44982	0.60543
509	0.45277	0.61134
510	0.45691	0.61666
511	0.45986	0.62256
512	0.46399	0.62847
513	0.46812	0.63438
514	0.47226	0.64206
515	0.47639	0.64501
516	0.48052	0.65269
517	0.48465	0.65741
518	0.48878	0.66391
519	0.49233	0.67041
520	0.49587	0.67513
521	0.50059	0.68222
522	0.50472	0.68813
523	0.51004	0.69522
524	0.51299	0.69935
525	0.51712	0.70408
526	0.52007	0.71116
527	0.52479	0.71707
528	0.52834	0.71943
529	0.53188	0.72534
530	0.53483	0.72888
531	0.53837	0.7342
532	0.54132	0.73952
533	0.54427	0.74247
534	0.54723	0.7466
535	0.54959	0.75015
536	0.55195	0.75428
537	0.55549	0.75724
538	0.55785	0.76137
539	0.55962	0.76432
540	0.56257	0.7661
541	0.56434	0.76964
542	0.56553	0.772
543	0.56789	0.772
544	0.56848	0.77437
545	0.57025	0.77496
546	0.57143	0.77673
547	0.57261	0.7785
548	0.57379	0.77909
549	0.57497	0.77968
550	0.57497	0.78263
551	0.57615	0.78145
552	0.57615	0.78086
553	0.57615	0.78204
554	0.57733	0.78086
555	0.57733	0.78027
556	0.57615	0.78027
557	0.57733	0.78086
558	0.57615	0.7785
559	0.57615	0.7785
560	0.57497	0.77909
561	0.57497	0.77732
562	0.57438	0.77555
563	0.5732	0.77437
564	0.57261	0.77318
565	0.57261	0.772
566	0.57084	0.77082
567	0.57025	0.76728
568	0.56848	0.7661
569	0.5673	0.76432
570	0.56612	0.76373
571	0.56494	0.7596
572	0.56316	0.75546
573	0.56257	0.75487
574	0.56021	0.75251
575	0.55903	0.74956
576	0.55667	0.74778
577	0.5549	0.74483
578	0.55313	0.7407
579	0.55136	0.73952
580	0.549	0.73597
581	0.54782	0.73302
582	0.54545	0.73006
583	0.54368	0.72711
584	0.54073	0.72416
585	0.53955	0.71943
586	0.53719	0.71589
587	0.53424	0.71412
588	0.53188	0.70821
589	0.52893	0.70526
590	0.52656	0.70171
591	0.5242	0.69876
592	0.52243	0.69344
593	0.52007	0.6899
594	0.51653	0.68517
595	0.51299	0.68104
596	0.51122	0.6769
597	0.50826	0.67277
598	0.5059	0.66864
599	0.50354	0.6645
600	0.5	0.66096
601	0.49764	0.65741
602	0.4941	0.65151
603	0.49174	0.64796
604	0.48878	0.64383
605	0.48642	0.6391
606	0.48288	0.63497
607	0.48052	0.63083
608	0.47698	0.6267
609	0.47344	0.62138
610	0.47048	0.61666
611	0.46812	0.61311
612	0.46458	0.6078
613	0.46163	0.60307
614	0.45868	0.59776
615	0.45514	0.59362
616	0.45218	0.5883
617	0.44864	0.58358
618	0.44628	0.57767
619	0.44274	0.57472
620	0.43979	0.57058
621	0.43743	0.56586
622	0.43388	0.56172
623	0.43034	0.557
624	0.4268	0.55286
625	0.42503	0.54755
626	0.42208	0.544
627	0.41854	0.53928
628	0.41499	0.53396
629	0.41204	0.52865
630	0.40968	0.5251
631	0.40614	0.51979
632	0.40201	0.51624
633	0.39965	0.51093
634	0.39728	0.50738
635	0.39315	0.50148
636	0.38961	0.49675
637	0.38666	0.49262
638	0.38371	0.48848
639	0.38017	0.48317
640	0.3778	0.47844
641	0.37426	0.4749
642	0.37131	0.47017
643	0.36777	0.46663
644	0.36541	0.46308
645	0.36305	0.45895
646	0.3595	0.45363
647	0.35655	0.45009
648	0.35419	0.44536
649	0.35124	0.44241
650	0.34829	0.43768
651	0.34534	0.43473
652	0.34179	0.43001
653	0.34002	0.42587
654	0.33707	0.42174
655	0.33353	0.41819
656	0.33117	0.41406
657	0.32881	0.40992
658	0.32527	0.4052
659	0.32172	0.40165
660	0.31936	0.39752
661	0.31641	0.39398
662	0.31405	0.39043
663	0.31228	0.38689
664	0.30933	0.38393
665	0.30638	0.38039
666	0.30342	0.37626
667	0.30047	0.37271
668	0.2987	0.36917
669	0.29634	0.36621
670	0.29457	0.36267
671	0.29162	0.35972
672	0.28867	0.35617
673	0.2863	0.35263
674	0.28394	0.34968
675	0.28158	0.34554
676	0.27922	0.34259
677	0.27686	0.33963
678	0.27509	0.33609
679	0.27155	0.33314
680	0.26919	0.33018
681	0.26682	0.32723
682	0.26505	0.32369
683	0.26269	0.32073
684	0.26092	0.31837
685	0.25856	0.31483
686	0.2562	0.31187
687	0.25325	0.30892
688	0.25207	0.30656
689	0.2497	0.30419
690	0.24734	0.30124
691	0.24557	0.29888
692	0.2438	0.29652
693	0.24144	0.29415
694	0.23967	0.29061
695	0.23731	0.28766
696	0.23554	0.28411
697	0.23377	0.28293
698	0.232	0.28057
699	0.22963	0.27702
700	0.22727	0.27466
701	0.22609	0.2723
702	0.22373	0.26994
703	0.22196	0.26816
704	0.22078	0.26521
705	0.21842	0.26285
706	0.21665	0.26048
707	0.21488	0.25812
708	0.21251	0.25576
709	0.21192	0.25399
710	0.20956	0.25162
711	0.20838	0.24985
712	0.20661	0.24808
713	0.20543	0.24513
714	0.20248	0.24335
715	0.2013	0.2404
716	0.20012	0.23981
717	0.19776	0.23686
718	0.19658	0.23568
719	0.19481	0.23331
720	0.19362	0.23095
721	0.19185	0.22918
722	0.19008	0.22682
723	0.18831	0.22445
724	0.18713	0.22327
725	0.18595	0.22032
726	0.18418	0.21855
727	0.183	0.21677
728	0.18064	0.215
729	0.17946	0.21382
730	0.17887	0.21146
731	0.1771	0.21028
732	0.17591	0.20851
733	0.17414	0.20673
734	0.17355	0.20437
735	0.17119	0.20319
736	0.17001	0.20142
737	0.16883	0.19905
738	0.16824	0.19905
739	0.16588	0.19669
740	0.16411	0.19551
741	0.16352	0.19256
742	0.16175	0.19079
743	0.16116	0.19019
744	0.15939	0.18842
745	0.15821	0.18665
746	0.15643	0.18429
747	0.15525	0.18193
748	0.15466	0.18074
749	0.15289	0.18015
750	0.1523	0.17897
751	0.15053	0.17661
752	0.14935	0.17602
753	0.14876	0.17366
754	0.14699	0.17307
755	0.1464	0.17307
756	0.14463	0.17011
757	0.14404	0.16834
758	0.14286	0.16716
759	0.14168	0.16598
760	0.1405	0.1648
761	0.13932	0.16302
762	0.13813	0.16184
763	0.13754	0.16184
764	0.13577	0.15889
765	0.13518	0.1583
766	0.13341	0.15653
767	0.13282	0.15535
768	0.13164	0.15416
769	0.13105	0.15239
770	0.12987	0.15121
771	0.1281	0.15003
772	0.1281	0.15003
773	0.12633	0.14767
774	0.12515	0.14708
775	0.12515	0.14471
776	0.12397	0.14412
777	0.12279	0.14353
778	0.12161	0.14176
779	0.12102	0.13999
780	0.11983	0.13999
781	0.11983	0.13881
782	0.11865	0.13763
783	0.11747	0.13644
784	0.11629	0.13526
785	0.11511	0.13408
786	0.11334	0.13231
787	0.11393	0.13231
788	0.11334	0.13054
789	0.11157	0.12936
790	0.11039	0.12817
791	0.11039	0.12817
792	0.10921	0.1264
793	0.10862	0.12522
794	0.10744	0.12463
795	0.10685	0.12345
796	0.10685	0.12227
797	0.10449	0.12109
798	0.1039	0.11931
799	0.1039	0.11991
800	0.10272	0.11872
801	0.10213	0.11695
802	0.10094	0.11636
803	0.10035	0.11518
804	0.09976	0.114
805	0.09858	0.11282
806	0.09858	0.11282
807	0.09681	0.11045
808	0.09622	0.11045
809	0.09563	0.11045
810	0.09504	0.10868
811	0.09445	0.10809
812	0.09327	0.1075
813	0.09209	0.10632
814	0.0915	0.10514
815	0.0915	0.10396
816	0.0915	0.10337
817	0.09032	0.10278
818	0.08973	0.10159
819	0.08914	0.10159
820	0.08796	0.101
821	0.08678	0.09923
822	0.08678	0.09864
823	0.08619	0.09746
824	0.08501	0.09628
825	0.08442	0.09628
826	0.08442	0.0951
827	0.08264	0.09392
828	0.08264	0.09392
829	0.08264	0.09273
830	0.08205	0.09214
831	0.07969	0.09096
832	0.07969	0.08978
833	0.0791	0.08919
834	0.0791	0.08919
835	0.07851	0.08801
836	0.07851	0.08801
837	0.07733	0.08683
838	0.07733	0.08624
839	0.07615	0.08506
840	0.07438	0.08506
841	0.07497	0.08447
842	0.07379	0.08328
843	0.07379	0.08269
844	0.07261	0.08151
845	0.07261	0.08092
846	0.07202	0.08092
847	0.07143	0.07974
848	0.07143	0.07856
849	0.07084	0.07797
850	0.06907	0.07679
851	0.06966	0.07679
852	0.0673	0.07501
853	0.0673	0.07561
854	0.0673	0.07501
855	0.0673	0.07501
856	0.0673	0.07324
857	0.06553	0.07324
858	0.06612	0.07206
859	0.06434	0.07029
860	0.06494	0.07206
861	0.06553	0.0697
862	0.06375	0.06793
863	0.06257	0.06852
864	0.0608	0.06734
865	0.06316	0.06911
866	0.0608	0.06734
867	0.06139	0.06556
868	0.06021	0.06675
869	0.06021	0.06379
870	0.06021	0.06497
871	0.05844	0.06202
872	0.05962	0.06202
873	0.05667	0.06379
874	0.05726	0.06261
875	0.05785	0.06261
876	0.05785	0.06202
877	0.05844	0.0632
878	0.05549	0.05789
879	0.05667	0.06025
880	0.05431	0.05729
881	0.05549	0.05907
882	0.05372	0.05729
883	0.05431	0.05434
884	0.05431	0.05552
885	0.05136	0.05316
886	0.05195	0.05907
887	0.04959	0.05316
888	0.04959	0.05611
889	0.05018	0.05434
890	0.05195	0.05611
891	0.05431	0.05493
892	0.05018	0.05434
893	0.05136	0.05316
894	0.05136	0.05139
895	0.05136	0.04607
896	0.04664	0.05552
897	0.04841	0.05021
898	0.04782	0.05198
899	0.05195	0.05434
900	0.04309	0.04903
901	0.04841	0.05493
902	0.04368	0.04666
903	0.04959	0.05021
904	0.04782	0.05021
905	0.04723	0.05139
906	0.04723	0.05139
907	0.04486	0.04843
908	0.04664	0.04962
909	0.04545	0.04843
910	0.04545	0.04784
911	0.04427	0.04666
912	0.04486	0.04548
913	0.04309	0.04666
914	0.04191	0.0443
915	0.04309	0.04548
916	0.04309	0.04489
917	0.0425	0.04489
918	0.04191	0.0443
919	0.04191	0.0443
920	0.04132	0.0443
921	0.04073	0.04371
922	0.04014	0.04253
923	0.04132	0.04194
924	0.03955	0.04312
925	0.03955	0.04194
926	0.03896	0.04135
927	0.03896	0.04135
928	0.03837	0.04076
929	0.03778	0.03957
930	0.03837	0.04017
931	0.03719	0.04017
932	0.03778	0.03957
933	0.03778	0.03957
934	0.03719	0.04017
935	0.0366	0.03721
936	0.03542	0.0378
937	0.0366	0.0378
938	0.0366	0.03839
939	0.0366	0.03898
940	0.03542	0.03839
941	0.03424	0.03662
942	0.03424	0.03603
943	0.03542	0.03603
944	0.03424	0.03603
945	0.03365	0.03603
946	0.03483	0.03544
947	0.03306	0.03485
948	0.03306	0.03544
949	0.03247	0.03603
950	0.03247	0.0378
951	0.03247	0.03426
952	0.03188	0.03485
953	0.03129	0.03308
954	0.0307	0.03426
955	0.03188	0.03367
956	0.03129	0.03544
957	0.03129	0.03367
958	0.0307	0.03426
959	0.03129	0.03367
960	0.0307	0.03367
961	0.03011	0.03308
962	0.02893	0.03249
963	0.03011	0.0319
964	0.02893	0.03012
965	0.02834	0.03071
966	0.02834	0.03012
967	0.02834	0.03131
968	0.02774	0.03071
969	0.02715	0.03012
970	0.02715	0.02953
971	0.02715	0.02953
972	0.02774	0.02953
973	0.02656	0.02835
974	0.02656	0.02894
975	0.02656	0.02894
976	0.02656	0.02835
977	0.02479	0.02835
978	0.02597	0.02776
979	0.02538	0.02717
980	0.02479	0.02776
981	0.02361	0.02599
982	0.02479	0.02658
983	0.02361	0.02658
984	0.02361	0.02481
985	0.0242	0.02599
986	0.02302	0.02481
987	0.02361	0.02599
988	0.02243	0.02599
989	0.02302	0.0254
990	0.02361	0.02717
991	0.02125	0.02422
992	0.02184	0.02422
993	0.02243	0.02363
994	0.02125	0.02363
995	0.02066	0.02304
996	0.02066	0.02304
997	0.02066	0.02245
998	0.02007	0.02304
999	0.01948	0.02126
1000	0.01948	0.02126
1001	0.01889	0.02126
1002	0.01948	0.02067
1003	0.01948	0.02126
1004	0.01948	0.02008
1005	0.01889	0.01949
1006	0.0183	0.01949
1007	0.01771	0.01772
1008	0.01771	0.02067
1009	0.01712	0.01831
1010	0.0183	0.01831
1011	0.01771	0.01831
1012	0.01712	0.01831
1013	0.01712	0.01831
1014	0.01771	0.01831
1015	0.01653	0.01595
1016	0.01535	0.01713
1017	0.01653	0.01595
1018	0.01594	0.01713
1019	0.01594	0.01595
1020	0.01535	0.01595
1021	0.01535	0.01536
1022	0.01476	0.01536
1023	0.01417	0.01477
1024	0.01358	0.01418
1025	0.01417	0.01418
1026	0.01417	0.01359
1027	0.01417	0.01299
1028	0.01417	0.01418
1029	0.0124	0.01359
1030	0.01358	0.01359
1031	0.01299	0.01299
1032	0.01181	0.0124
1033	0.01181	0.01063
1034	0.0124	0.0124
1035	0.0124	0.01122
1036	0.01122	0.01122
1037	0.01122	0.01122
1038	0.01122	0.01063
1039	0.01063	0.01063
1040	0.01004	0.01004
1041	0.01063	0.01004
1042	0.00945	0.00945
1043	0.00945	0.00945
1044	0.01004	0.01004
1045	0.01004	0.00886
1046	0.01004	0.00886
1047	0.00945	0.00827
1048	0.00885	0.00886
1049	0.00945	0.00886
1050	0.00826	0.00768
1051	0.00945	0.00709
1052	0.00885	0.00768
1053	0.00826	0.0065
1054	0.00767	0.0065
1055	0.00767	0.0065
1056	0.00767	0.00768
1057	0.00826	0.00709
1058	0.00767	0.0065
1059	0.00649	0.00591
1060	0.00649	0.00532
1061	0.00767	0.00532
1062	0.00649	0.00591
1063	0.00649	0.00532
1064	0.00649	0.00532
1065	0.0059	0.00473
1066	0.0059	0.00354
1067	0.00531	0.00413
1068	0.0059	0.00413
1069	0.00472	0.00413
1070	0.00472	0.00354
1071	0.00531	0.00295
1072	0.00472	0.00354
1073	0.00472	0.00354
1074	0.00413	0.00295
1075	0.00472	0.00354
1076	0.00472	0.00295
1077	0.00354	0.00295
1078	0.00354	0.00177
1079	0.00354	0.00177
1080	0.00354	0.00177
1081	0.00295	0.000590667
1082	0.00295	0.00177
1083	0.00354	0.00118
1084	0.00295	0.00118
1085	0.00354	0.00177
1086	0.00354	0.000590667
1087	0.00236	0.00118
1088	0.00295	0.00118
1089	0.00236	0.00118
1090	0.00236	0.00177
1091	0.00177	0.00118
1092	0.00118	0.000590667
1093	0.00177	0.00177
1094	0.00118	0.000590667
1095	0.00177	0.000590667
1096	0.00118	0.00118
1097	0.000590319	0.000590667
1098	0.00118	0.00118
1099	0	0
1100	0.00118	0.000590667

## Sheet: fig 2d
546.5	0.09757	545.6	0.10873
546.45	0.0861	545.55	0.10447
546.4	0.07496	545.5	0.09569
546.35	0.07076	545.45	0.10797
546.3	0.07869	545.4	0.10741
546.25	0.10458	545.35	0.09686
546.2	0.08219	545.3	0.08289
546.15	0.07588	545.25	0.0974
546.1	0.0727	545.2	0.11342
546.05	0.07691	545.15	0.11575
546	0.09414	545.1	0.10887
545.95	0.09342	545.05	0.09169
545.9	0.07883	545	0.08679
545.85	0.07676	544.95	0.11816
545.8	0.10735	544.9	0.10661
545.75	0.11519	544.85	0.10937
545.7	0.08729	544.8	0.11583
545.65	0.09196	544.75	0.10469
545.6	0.10772	544.7	0.11813
545.55	0.11823	544.65	0.11728
545.5	0.11199	544.6	0.11455
545.45	0.12584	544.55	0.11201
545.4	0.09678	544.5	0.11977
545.35	0.09406	544.45	0.08684
545.3	0.06521	544.4	0.09708
545.25	0.08667	544.35	0.12191
545.2	0.09532	544.3	0.14545
545.15	0.08	544.25	0.12996
545.1	0.10026	544.2	0.12525
545.05	0.11321	544.15	0.08763
545	0.07029	544.1	0.0922
544.95	0.05626	544.05	0.09214
544.9	0.07566	544	0.09172
544.85	0.06481	543.95	0.09755
544.8	0.06842	543.9	0.09964
544.75	0.09298	543.85	0.14252
544.7	0.07805	543.8	0.13399
544.65	0.08038	543.75	0.0946
544.6	0.08874	543.7	0.11661
544.55	0.08713	543.65	0.12674
544.5	0.08296	543.6	0.05695
544.45	0.07141	543.55	0.0899
544.4	0.07596	543.5	0.12233
544.35	0.10752	543.45	0.09345
544.3	0.11008	543.4	0.10487
544.25	0.08542	543.35	0.09835
544.2	0.1186	543.3	0.10066
544.15	0.09897	543.25	0.11209
544.1	0.08193	543.2	0.10601
544.05	0.09081	543.15	0.11721
544	0.0957	543.1	0.11421
543.95	0.08035	543.05	0.10383
543.9	0.09669	543	0.11551
543.85	0.09574	542.95	0.09918
543.8	0.09349	542.9	0.09567
543.75	0.09169	542.85	0.08034
543.7	0.09192	542.8	0.09598
543.65	0.11653	542.75	0.08274
543.6	0.10315	542.7	0.10739
543.55	0.10658	542.65	0.12944
543.5	0.09628	542.6	0.11421
543.45	0.09265	542.55	0.11683
543.4	0.08782	542.5	0.08406
543.35	0.10167	542.45	0.07867
543.3	0.08285	542.4	0.11884
543.25	0.07323	542.35	0.13434
543.2	0.09359	542.3	0.0884
543.15	0.10211	542.25	0.08049
543.1	0.10945	542.2	0.10143
543.05	0.09234	542.15	0.09524
543	0.08148	542.1	0.0716
542.95	0.07915	542.05	0.09996
542.9	0.07117	542	0.10195
542.85	0.07384	541.95	0.11177
542.8	0.10975	541.9	0.14322
542.75	0.08471	541.85	0.11168
542.7	0.10274	541.8	0.10505
542.65	0.09238	541.75	0.098
542.6	0.072	541.7	0.08296
542.55	0.08656	541.65	0.10005
542.5	0.0939	541.6	0.10435
542.45	0.09389	541.55	0.10091
542.4	0.07915	541.5	0.09897
542.35	0.09479	541.45	0.07497
542.3	0.09763	541.4	0.09784
542.25	0.10523	541.35	0.09887
542.2	0.08395	541.3	0.09429
542.15	0.07951	541.25	0.07873
542.1	0.10917	541.2	0.08096
542.05	0.0923	541.15	0.10636
542	0.08972	541.1	0.08393
541.95	0.0752	541.05	0.07115
541.9	0.07943	541	0.09938
541.85	0.07596	540.95	0.0923
541.8	0.06043	540.9	0.08821
541.75	0.08451	540.85	0.09728
541.7	0.09183	540.8	0.09605
541.65	0.08232	540.75	0.1178
541.6	0.05974	540.7	0.09147
541.55	0.08624	540.65	0.08902
541.5	0.07935	540.6	0.10245
541.45	0.06749	540.55	0.08289
541.4	0.07678	540.5	0.06024
541.35	0.07284	540.45	0.09423
541.3	0.07305	540.4	0.0782
541.25	0.06496	540.35	0.08012
541.2	0.08039	540.3	0.08969
541.15	0.07511	540.25	0.0836
541.1	0.08656	540.2	0.07255
541.05	0.06593	540.15	0.0728
541	0.08573	540.1	0.07023
540.95	0.08335	540.05	0.07854
540.9	0.06088	540	0.03984
540.85	0.07306	539.95	0.06779
540.8	0.0807	539.9	0.07301
540.75	0.07208	539.85	0.0729
540.7	0.07123	539.8	0.07106
540.65	0.07507	539.75	0.05268
540.6	0.06926	539.7	0.0748
540.55	0.05373	539.65	0.07783
540.5	0.07587	539.6	0.07515
540.45	0.06486	539.55	0.05776
540.4	0.07167	539.5	0.0531
540.35	0.08734	539.45	0.05305
540.3	0.06377	539.4	0.08275
540.25	0.06824	539.35	0.06185
540.2	0.06647	539.3	0.05426
540.15	0.05655	539.25	0.06071
540.1	0.05915	539.2	0.04638
540.05	0.05596	539.15	0.06357
540	0.04933	539.1	0.04435
539.95	0.05707	539.05	0.05048
539.9	0.07528	539	0.0519
539.85	0.04389	538.95	0.07427
539.8	0.04339	538.9	0.05946
539.75	0.06575	538.85	0.03873
539.7	0.04948	538.8	0.04008
539.65	0.06071	538.75	0.06652
539.6	0.04439	538.7	0.07131
539.55	0.04207	538.65	0.07346
539.5	0.04357	538.6	0.03531
539.45	0.03404	538.55	0.03552
539.4	0.05367	538.5	0.0634
539.35	0.04325	538.45	0.05535
539.3	0.05864	538.4	0.0434
539.25	0.05996	538.35	0.06174
539.2	0.08106	538.3	0.04635
539.15	0.06205	538.25	0.05991
539.1	0.06284	538.2	0.10117
539.05	0.05027	538.15	0.07256
539	0.05558	538.1	0.04698
538.95	0.04596	538.05	0.08127
538.9	0.05524	538	0.0736
538.85	0.0433	537.95	0.08606
538.8	0.03721	537.9	0.0984
538.75	0.04761	537.85	0.07971
538.7	0.02836	537.8	0.0619
538.65	0.05031	537.75	0.05688
538.6	0.05541	537.7	0.06854
538.55	0.03716	537.65	0.08352
538.5	0.05291	537.6	0.05833
538.45	0.0537	537.55	0.06373
538.4	0.04125	537.5	0.06905
538.35	0.0471	537.45	0.05629
538.3	0.04106	537.4	0.05962
538.25	0.0447	537.35	0.0411
538.2	0.05301	537.3	0.02195
538.15	0.04478	537.25	0.04581
538.1	0.03314	537.2	0.07907
538.05	0.03278	537.15	0.05018
538	0.03311	537.1	0.05252
537.95	0.04142	537.05	0.06043
537.9	0.04689	537	0.0608
537.85	0.04694	536.95	0.05663
537.8	0.04061	536.9	0.04907
537.75	0.03596	536.85	0.04995
537.7	0.03026	536.8	0.06314
537.65	0.06377	536.75	0.08165
537.6	0.04443	536.7	0.05989
537.55	0.04122	536.65	0.07723
537.5	0.04832	536.6	0.07661
537.45	0.04963	536.55	0.06467
537.4	0.03518	536.5	0.0533
537.35	0.03594	536.45	0.04366
537.3	0.05701	536.4	0.03902
537.25	0.07	536.35	0.07503
537.2	0.04641	536.3	0.06052
537.15	0.06101	536.25	0.05733
537.1	0.04317	536.2	0.07456
537.05	0.0479	536.15	0.07312
537	0.03473	536.1	0.07394
536.95	0.03653	536.05	0.07654
536.9	0.03534	536	0.05409
536.85	0.0495	535.95	0.07366
536.8	0.0454	535.9	0.06779
536.75	0.04525	535.85	0.05252
536.7	0.05007	535.8	0.03927
536.65	0.06011	535.75	0.04753
536.6	0.0493	535.7	0.0562
536.55	0.03932	535.65	0.04825
536.5	0.07414	535.6	0.06576
536.45	0.07065	535.55	0.06343
536.4	0.05667	535.5	0.06285
536.35	0.0293	535.45	0.05312
536.3	0.02953	535.4	0.05078
536.25	0.04451	535.35	0.05356
536.2	0.04439	535.3	0.0532
536.15	0.05142	535.25	0.07155
536.1	0.02449	535.2	0.06924
536.05	0.02824	535.15	0.05786
536	0.05495	535.1	0.04578
535.95	0.03975	535.05	0.06038
535.9	0.04231	535	0.0785
535.85	0.07597	534.95	0.04528
535.8	0.05099	534.9	0.05511
535.75	0.04222	534.85	0.05462
535.7	0.03799	534.8	0.03825
535.65	0.02984	534.75	0.05725
535.6	0.04734	534.7	0.04147
535.55	0.06091	534.65	0.05628
535.5	0.04975	534.6	0.05063
535.45	0.03605	534.55	0.04833
535.4	0.02888	534.5	0.03824
535.35	0.04232	534.45	0.06513
535.3	0.06265	534.4	0.08753
535.25	0.05093	534.35	0.06505
535.2	0.06167	534.3	0.0631
535.15	0.05424	534.25	0.07587
535.1	0.0399	534.2	0.07862
535.05	0.05179	534.15	0.03985
535	0.05265	534.1	0.03964
534.95	0.03456	534.05	0.0747
534.9	0.04938	534	0.08451
534.85	0.05696	533.95	0.06348
534.8	0.05421	533.9	0.0602
534.75	0.03767	533.85	0.04816
534.7	0.03423	533.8	0.06828
534.65	0.04033	533.75	0.06686
534.6	0.04028	533.7	0.05803
534.55	0.0318	533.65	0.07019
534.5	0.02465	533.6	0.08486
534.45	0.01716	533.55	0.05966
534.4	0.03177	533.5	0.0758
534.35	0.0487	533.45	0.07101
534.3	0.0421	533.4	0.07836
534.25	0.02928	533.35	0.07841
534.2	0.03968	533.3	0.07624
534.15	0.05028	533.25	0.07653
534.1	0.05621	533.2	0.09303
534.05	0.05096	533.15	0.07025
534	0.03508	533.1	0.07387
533.95	0.04455	533.05	0.06693
533.9	0.06039	533	0.08335
533.85	0.04637	532.95	0.13788
533.8	0.04569	532.9	0.12803
533.75	0.05481	532.85	0.10367
533.7	0.02353	532.8	0.1236
533.65	0.02669	532.75	0.0985
533.6	0.04961	532.7	0.1012
533.55	0.06623	532.65	0.11915
533.5	0.06717	532.6	0.13068
533.45	0.06567	532.55	0.12205
533.4	0.0566	532.5	0.1329
533.35	0.06727	532.45	0.13631
533.3	0.0669	532.4	0.15984
533.25	0.0734	532.35	0.15075
533.2	0.07132	532.3	0.13226
533.15	0.06474	532.25	0.17126
533.1	0.07254	532.2	0.20849
533.05	0.07894	532.15	0.21471
533	0.0776	532.1	0.17667
532.95	0.07166	532.05	0.18713
532.9	0.07421	532	0.2307
532.85	0.06963	531.95	0.21215
532.8	0.06115	531.9	0.20872
532.75	0.09743	531.85	0.20703
532.7	0.10394	531.8	0.21866
532.65	0.0877	531.75	0.21156
532.6	0.10651	531.7	0.21673
532.55	0.11382	531.65	0.19837
532.5	0.09859	531.6	0.20136
532.45	0.088	531.55	0.22863
532.4	0.13764	531.5	0.23129
532.35	0.13187	531.45	0.2193
532.3	0.10136	531.4	0.24597
532.25	0.11973	531.35	0.20945
532.2	0.13727	531.3	0.21058
532.15	0.14093	531.25	0.24449
532.1	0.14691	531.2	0.2319
532.05	0.14099	531.15	0.25819
532	0.1433	531.1	0.30465
531.95	0.15281	531.05	0.28917
531.9	0.14622	531	0.34261
531.85	0.13729	530.95	0.36175
531.8	0.15311	530.9	0.37472
531.75	0.1551	530.85	0.42755
531.7	0.16378	530.8	0.47111
531.65	0.17991	530.75	0.47894
531.6	0.17826	530.7	0.52759
531.55	0.17057	530.65	0.64136
531.5	0.18358	530.6	0.66519
531.45	0.16318	530.55	0.72263
531.4	0.18053	530.5	0.7724
531.35	0.17433	530.45	0.83605
531.3	0.20878	530.4	0.85679
531.25	0.19077	530.35	0.84727
531.2	0.21709	530.3	0.97378
531.15	0.23448	530.25	1
531.1	0.22005	530.2	0.97098
531.05	0.24111	530.15	0.97157
531	0.26894	530.1	0.95127
530.95	0.29031	530.05	0.94957
530.9	0.31352	530	0.88186
530.85	0.33263	529.95	0.85123
530.8	0.36691	529.9	0.75601
530.75	0.44485	529.85	0.70257
530.7	0.45793	529.8	0.64555
530.65	0.46397	529.75	0.58927
530.6	0.54116	529.7	0.51721
530.55	0.54479	529.65	0.41317
530.5	0.60436	529.6	0.38487
530.45	0.73283	529.55	0.38481
530.4	0.77824	529.5	0.29495
530.35	0.79964	529.45	0.23812
530.3	0.8179	529.4	0.19581
530.25	0.86234	529.35	0.16309
530.2	0.86705	529.3	0.13918
530.15	0.95313	529.25	0.14257
530.1	1	529.2	0.10606
530.05	0.91594	529.15	0.09293
530	0.84653	529.1	0.08999
529.95	0.88792	529.05	0.03934
529.9	0.79775	529	0.04946
529.85	0.77953	528.95	0.07892
529.8	0.71539	528.9	0.06661
529.75	0.62538	528.85	0.05375
529.7	0.58805	528.8	0.03973
529.65	0.54017	528.75	0.04608
529.6	0.43249	528.7	0.03303
529.55	0.42125	528.65	0.04305
529.5	0.35799	528.6	0.04028
529.45	0.25312	528.55	0.04573
529.4	0.24424	528.5	0.04084
529.35	0.2141	528.45	0.04926
529.3	0.18297	528.4	0.0585
529.25	0.13351	528.35	0.0357
529.2	0.10524	528.3	0.06735
529.15	0.08141	528.25	0.03612
529.1	0.07656	528.2	0.01496
529.05	0.07125	528.15	0.02399
529	0.08839	528.1	0.02092
528.95	0.06929	528.05	0.04003
528.9	0.06031	528	0.04599
528.85	0.06562	527.95	0.05077
528.8	0.07193	527.9	0.04528
528.75	0.05945	527.85	0.03947
528.7	0.03332	527.8	0.02688
528.65	0.04914	527.75	0.03476
528.6	0.02768	527.7	0.02713
528.55	0.02875	527.65	0.06653
528.5	0.02398	527.6	0.04705
528.45	0.01561	527.55	0.04829
528.4	0.01682	527.5	0.02284
528.35	0.03707	527.45	0.03784
528.3	0.01964	527.4	0.03255
528.25	0.03926	527.35	0.03769
528.2	0.03047	527.3	0.03274
528.15	0.02598	527.25	0.01207
528.1	0.01712	527.2	0.03009
528.05	0.01428	527.15	0.03566
528	0.02166	527.1	0.04263
527.95	0.03339	527.05	0.04028
527.9	0.03451	527	0.03504
527.85	0.0425	526.95	0.03811
527.8	0.03141	526.9	0.05538
527.75	0.01894	526.85	0.01864
527.7	0.01656	526.8	0.03194
527.65	0.02305	526.75	0.02951
527.6	0.02249	526.7	0.03091
527.55	0.01377	526.65	0.02786
527.5	0.00645	526.6	0.03473
527.45	0.00707	526.55	0.03724
527.4	0.02485	526.5	0.01991
527.35	0.02337	526.45	0.02682
527.3	0.00954	526.4	0.01657
527.25	0.02408	526.35	0.01514
527.2	0.0282	526.3	0.00907
527.15	0.03549	526.25	0.04363
527.1	0.04306	526.2	0.03498
527.05	0.02903	526.15	0.03992
527	0.00968	526.1	0.00856
526.95	0.00278	526.05	0.01676
526.9	0	526	0.03147
526.85	0.000477913	525.95	0.00933
526.8	0.02164	525.9	0
526.75	0.02818	525.85	0.03415
526.7	0.01349	525.8	0.01063
526.65	0.02731	525.75	0.0067
526.6	0.01346	525.7	0.0027
526.55	0.01313	525.65	0.02563
526.5	0.01989	525.6	0.04296

## Sheet: fig 2e
475.6	0.12458	476.5	0.12272
475.55	0.12932	476.45	0.12491
475.5	0.12262	476.4	0.12191
475.45	0.13394	476.35	0.11671
475.4	0.12956	476.3	0.10787
475.35	0.13693	476.25	0.10904
475.3	0.12901	476.2	0.1231
475.25	0.11759	476.15	0.12257
475.2	0.12427	476.1	0.11123
475.15	0.11781	476.05	0.12899
475.1	0.12022	476	0.11944
475.05	0.12087	475.95	0.11607
475	0.1318	475.9	0.11703
474.95	0.12665	475.85	0.12063
474.9	0.1195	475.8	0.11781
474.85	0.12821	475.75	0.12465
474.8	0.14061	475.7	0.12444
474.75	0.13568	475.65	0.11264
474.7	0.1386	475.6	0.10244
474.65	0.12252	475.55	0.12151
474.6	0.13452	475.5	0.12306
474.55	0.14045	475.45	0.12865
474.5	0.13823	475.4	0.11163
474.45	0.14812	475.35	0.117
474.4	0.13181	475.3	0.12274
474.35	0.13051	475.25	0.11829
474.3	0.12386	475.2	0.12142
474.25	0.13067	475.15	0.11141
474.2	0.13884	475.1	0.11667
474.15	0.14597	475.05	0.12421
474.1	0.14159	475	0.11752
474.05	0.12996	474.95	0.11428
474	0.13	474.9	0.12354
473.95	0.12886	474.85	0.11644
473.9	0.13482	474.8	0.1241
473.85	0.12558	474.75	0.1116
473.8	0.1407	474.7	0.12076
473.75	0.14273	474.65	0.11751
473.7	0.15702	474.6	0.11565
473.65	0.14077	474.55	0.12017
473.6	0.14917	474.5	0.12249
473.55	0.14796	474.45	0.12009
473.5	0.15871	474.4	0.12783
473.45	0.15897	474.35	0.1311
473.4	0.15388	474.3	0.13166
473.35	0.15647	474.25	0.12502
473.3	0.15426	474.2	0.13163
473.25	0.15286	474.15	0.12098
473.2	0.16769	474.1	0.13617
473.15	0.16634	474.05	0.12457
473.1	0.14259	474	0.13143
473.05	0.15457	473.95	0.11942
473	0.15339	473.9	0.12775
472.95	0.16015	473.85	0.12742
472.9	0.1633	473.8	0.14551
472.85	0.16505	473.75	0.14142
472.8	0.16825	473.7	0.14282
472.75	0.16757	473.65	0.14198
472.7	0.17149	473.6	0.13419
472.65	0.18008	473.55	0.13328
472.6	0.1702	473.5	0.14945
472.55	0.16416	473.45	0.1495
472.5	0.16783	473.4	0.14394
472.45	0.18022	473.35	0.1409
472.4	0.20094	473.3	0.14659
472.35	0.17584	473.25	0.15533
472.3	0.16848	473.2	0.15896
472.25	0.16876	473.15	0.15248
472.2	0.17941	473.1	0.15057
472.15	0.16826	473.05	0.15168
472.1	0.16677	473	0.1601
472.05	0.16765	472.95	0.1444
472	0.16731	472.9	0.15159
471.95	0.16541	472.85	0.15443
471.9	0.15478	472.8	0.15524
471.85	0.16429	472.75	0.15915
471.8	0.15338	472.7	0.15976
471.75	0.15901	472.65	0.15594
471.7	0.15056	472.6	0.16142
471.65	0.14554	472.55	0.16556
471.6	0.15099	472.5	0.14716
471.55	0.14386	472.45	0.14844
471.5	0.14565	472.4	0.16301
471.45	0.14997	472.35	0.15325
471.4	0.14147	472.3	0.1587
471.35	0.14003	472.25	0.15924
471.3	0.12558	472.2	0.17588
471.25	0.1363	472.15	0.16026
471.2	0.12922	472.1	0.15065
471.15	0.13232	472.05	0.16923
471.1	0.13152	472	0.15758
471.05	0.13964	471.95	0.16587
471	0.13348	471.9	0.15963
470.95	0.13612	471.85	0.14804
470.9	0.12625	471.8	0.15162
470.85	0.1232	471.75	0.14952
470.8	0.11362	471.7	0.15273
470.75	0.11631	471.65	0.14644
470.7	0.12864	471.6	0.14815
470.65	0.1111	471.55	0.14188
470.6	0.12176	471.5	0.13703
470.55	0.10996	471.45	0.14083
470.5	0.11985	471.4	0.14345
470.45	0.10999	471.35	0.15751
470.4	0.11056	471.3	0.14248
470.35	0.117	471.25	0.13228
470.3	0.10608	471.2	0.12828
470.25	0.09855	471.15	0.13553
470.2	0.10482	471.1	0.12359
470.15	0.10129	471.05	0.12223
470.1	0.111	471	0.11601
470.05	0.10914	470.95	0.12242
470	0.0902	470.9	0.12525
469.95	0.0912	470.85	0.11997
469.9	0.09019	470.8	0.11205
469.85	0.09972	470.75	0.12628
469.8	0.0972	470.7	0.11524
469.75	0.09025	470.65	0.10481
469.7	0.09778	470.6	0.10104
469.65	0.09905	470.55	0.09909
469.6	0.09767	470.5	0.10939
469.55	0.09428	470.45	0.09515
469.5	0.09788	470.4	0.1126
469.45	0.09116	470.35	0.10846
469.4	0.09875	470.3	0.10915
469.35	0.08323	470.25	0.10908
469.3	0.08786	470.2	0.0963
469.25	0.09771	470.15	0.08936
469.2	0.0927	470.1	0.09728
469.15	0.08594	470.05	0.11083
469.1	0.08548	470	0.09394
469.05	0.08905	469.95	0.09087
469	0.0862	469.9	0.09099
468.95	0.08907	469.85	0.09433
468.9	0.0896	469.8	0.08317
468.85	0.09214	469.75	0.08688
468.8	0.09376	469.7	0.09701
468.75	0.08436	469.65	0.08252
468.7	0.08611	469.6	0.09329
468.65	0.09065	469.55	0.0869
468.6	0.10124	469.5	0.09234
468.55	0.09046	469.45	0.0933
468.5	0.08443	469.4	0.09538
468.45	0.08328	469.35	0.0956
468.4	0.07618	469.3	0.08383
468.35	0.07967	469.25	0.08085
468.3	0.08036	469.2	0.08721
468.25	0.09442	469.15	0.07568
468.2	0.09261	469.1	0.08374
468.15	0.08934	469.05	0.08587
468.1	0.08137	469	0.08163
468.05	0.09	468.95	0.0779
468	0.08857	468.9	0.09506
467.95	0.07862	468.85	0.0773
467.9	0.08276	468.8	0.07563
467.85	0.08494	468.75	0.07658
467.8	0.09236	468.7	0.07192
467.75	0.09366	468.65	0.0861
467.7	0.08721	468.6	0.08421
467.65	0.09249	468.55	0.08977
467.6	0.08259	468.5	0.0796
467.55	0.08591	468.45	0.08351
467.5	0.09146	468.4	0.08918
467.45	0.07786	468.35	0.0757
467.4	0.08524	468.3	0.07431
467.35	0.09457	468.25	0.07622
467.3	0.09125	468.2	0.07967
467.25	0.08884	468.15	0.07342
467.2	0.08226	468.1	0.08209
467.15	0.09076	468.05	0.0854
467.1	0.10479	468	0.0795
467.05	0.09417	467.95	0.08083
467	0.10142	467.9	0.07992
466.95	0.09255	467.85	0.08531
466.9	0.09905	467.8	0.09016
466.85	0.08993	467.75	0.08679
466.8	0.09231	467.7	0.07193
466.75	0.09359	467.65	0.07233
466.7	0.0995	467.6	0.07789
466.65	0.09763	467.55	0.07377
466.6	0.1036	467.5	0.06686
466.55	0.10469	467.45	0.07224
466.5	0.11812	467.4	0.0862
466.45	0.11833	467.35	0.08468
466.4	0.11046	467.3	0.07699
466.35	0.1184	467.25	0.08129
466.3	0.11366	467.2	0.08816
466.25	0.1219	467.15	0.0862
466.2	0.11325	467.1	0.08711
466.15	0.12062	467.05	0.09836
466.1	0.12993	467	0.09188
466.05	0.14576	466.95	0.0876
466	0.13977	466.9	0.09577
465.95	0.14835	466.85	0.08618
465.9	0.16426	466.8	0.09541
465.85	0.17211	466.75	0.10348
465.8	0.17805	466.7	0.09988
465.75	0.1761	466.65	0.09352
465.7	0.16885	466.6	0.10396
465.65	0.19257	466.55	0.09597
465.6	0.21692	466.5	0.09973
465.55	0.21467	466.45	0.10841
465.5	0.2101	466.4	0.10453
465.45	0.21929	466.35	0.10811
465.4	0.23067	466.3	0.1055
465.35	0.24813	466.25	0.12312
465.3	0.23576	466.2	0.12379
465.25	0.25307	466.15	0.12766
465.2	0.25502	466.1	0.1066
465.15	0.27422	466.05	0.12229
465.1	0.28868	466	0.12811
465.05	0.29127	465.95	0.12457
465	0.2978	465.9	0.14392
464.95	0.29164	465.85	0.13656
464.9	0.29063	465.8	0.14989
464.85	0.29409	465.75	0.16332
464.8	0.31804	465.7	0.16395
464.75	0.30798	465.65	0.17495
464.7	0.29429	465.6	0.18293
464.65	0.2985	465.55	0.1851
464.6	0.28852	465.5	0.19649
464.55	0.29434	465.45	0.2147
464.5	0.29622	465.4	0.21051
464.45	0.29343	465.35	0.22527
464.4	0.28403	465.3	0.24364
464.35	0.27845	465.25	0.22858
464.3	0.25392	465.2	0.23224
464.25	0.25491	465.15	0.2563
464.2	0.25975	465.1	0.24224
464.15	0.26588	465.05	0.27604
464.1	0.27017	465	0.29402
464.05	0.23443	464.95	0.28184
464	0.22196	464.9	0.28797
463.95	0.23066	464.85	0.29862
463.9	0.21564	464.8	0.29703
463.85	0.20533	464.75	0.31929
463.8	0.20191	464.7	0.30901
463.75	0.18991	464.65	0.30511
463.7	0.18234	464.6	0.28745
463.65	0.1585	464.55	0.30874
463.6	0.17182	464.5	0.29241
463.55	0.16213	464.45	0.29835
463.5	0.13997	464.4	0.30046
463.45	0.12591	464.35	0.27307
463.4	0.13175	464.3	0.27184
463.35	0.13078	464.25	0.28117
463.3	0.12573	464.2	0.27006
463.25	0.12389	464.15	0.27052
463.2	0.12507	464.1	0.24798
463.15	0.12285	464.05	0.23133
463.1	0.10219	464	0.23366
463.05	0.11542	463.95	0.22899
463	0.10619	463.9	0.21203
462.95	0.11122	463.85	0.19616
462.9	0.10216	463.8	0.21425
462.85	0.1067	463.75	0.18473
462.8	0.09805	463.7	0.19047
462.75	0.07754	463.65	0.18644
462.7	0.08881	463.6	0.15997
462.65	0.10192	463.55	0.15425
462.6	0.09126	463.5	0.14923
462.55	0.07524	463.45	0.13741
462.5	0.08332	463.4	0.13354
462.45	0.07656	463.35	0.12948
462.4	0.08204	463.3	0.12299
462.35	0.06708	463.25	0.11424
462.3	0.06997	463.2	0.10758
462.25	0.07697	463.15	0.11138
462.2	0.0694	463.1	0.11976
462.15	0.07306	463.05	0.09313
462.1	0.0872	463	0.0923
462.05	0.07597	462.95	0.08463
462	0.0637	462.9	0.09731
461.95	0.06545	462.85	0.08209
461.9	0.0651	462.8	0.08967
461.85	0.06411	462.75	0.08616
461.8	0.06361	462.7	0.09555
461.75	0.06453	462.65	0.08849
461.7	0.06885	462.6	0.08325
461.65	0.07391	462.55	0.08634
461.6	0.07281	462.5	0.08555
461.55	0.077	462.45	0.0843
461.5	0.07001	462.4	0.07122
461.45	0.06859	462.35	0.07884
461.4	0.0743	462.3	0.0715
461.35	0.07215	462.25	0.07176
461.3	0.07098	462.2	0.07168
461.25	0.07516	462.15	0.07859
461.2	0.08533	462.1	0.07903
461.15	0.07597	462.05	0.06733
461.1	0.07508	462	0.06232
461.05	0.08074	461.95	0.0648
461	0.08441	461.9	0.06599
460.95	0.07704	461.85	0.06586
460.9	0.07316	461.8	0.05984
460.85	0.08493	461.75	0.06263
460.8	0.08161	461.7	0.05946
460.75	0.08224	461.65	0.0689
460.7	0.08709	461.6	0.07527
460.65	0.07801	461.55	0.06735
460.6	0.09012	461.5	0.05411
460.55	0.08288	461.45	0.06603
460.5	0.07346	461.4	0.07294
460.45	0.08851	461.35	0.06827
460.4	0.09307	461.3	0.06562
460.35	0.07509	461.25	0.07059
460.3	0.08402	461.2	0.06995
460.25	0.09038	461.15	0.07171
460.2	0.10866	461.1	0.07265
460.15	0.11166	461.05	0.0689
460.1	0.11797	461	0.07387
460.05	0.11907	460.95	0.0787
460	0.12674	460.9	0.07239
459.95	0.14585	460.85	0.07486
459.9	0.15321	460.8	0.08124
459.85	0.16572	460.75	0.07659
459.8	0.18528	460.7	0.07777
459.75	0.21024	460.65	0.06692
459.7	0.25034	460.6	0.08481
459.65	0.2961	460.55	0.08
459.6	0.34551	460.5	0.07773
459.55	0.37093	460.45	0.0764
459.5	0.43291	460.4	0.07998
459.45	0.48107	460.35	0.08382
459.4	0.56536	460.3	0.07361
459.35	0.66891	460.25	0.08237
459.3	0.7056	460.2	0.08767
459.25	0.78415	460.15	0.08451
459.2	0.87122	460.1	0.09815
459.15	0.93979	460.05	0.09891
459.1	0.94001	460	0.11197
459.05	0.97057	459.95	0.1134
459	0.99836	459.9	0.12943
458.95	0.98638	459.85	0.13043
458.9	1	459.8	0.15285
458.85	0.93524	459.75	0.17682
458.8	0.92626	459.7	0.19777
458.75	0.88723	459.65	0.22596
458.7	0.82867	459.6	0.25485
458.65	0.73872	459.55	0.29678
458.6	0.62276	459.5	0.35492
458.55	0.56311	459.45	0.41762
458.5	0.48338	459.4	0.47255
458.45	0.41467	459.35	0.54498
458.4	0.36061	459.3	0.60626
458.35	0.30858	459.25	0.67919
458.3	0.2476	459.2	0.7412
458.25	0.2135	459.15	0.80882
458.2	0.18821	459.1	0.84166
458.15	0.15049	459.05	0.89113
458.1	0.1312	459	0.93229
458.05	0.10317	458.95	0.97853
458	0.08987	458.9	0.99156
457.95	0.0943	458.85	1
457.9	0.07864	458.8	0.96096
457.85	0.0713	458.75	0.9337
457.8	0.06734	458.7	0.8861
457.75	0.05551	458.65	0.83698
457.7	0.05838	458.6	0.77897
457.65	0.05148	458.55	0.66904
457.6	0.04763	458.5	0.59907
457.55	0.04473	458.45	0.51429
457.5	0.04019	458.4	0.45436
457.45	0.0421	458.35	0.37667
457.4	0.04629	458.3	0.34938
457.35	0.04008	458.25	0.25984
457.3	0.03578	458.2	0.21776
457.25	0.03777	458.15	0.18539
457.2	0.03564	458.1	0.14069
457.15	0.02902	458.05	0.13207
457.1	0.02949	458	0.1136
457.05	0.0221	457.95	0.09889
457	0.03103	457.9	0.07764
456.95	0.0232	457.85	0.06274
456.9	0.02703	457.8	0.06966
456.85	0.02235	457.75	0.06537
456.8	0.01541	457.7	0.05516
456.75	0.01545	457.65	0.05002
456.7	0.02347	457.6	0.04673
456.65	0.01695	457.55	0.03951
456.6	0.01514	457.5	0.02919
456.55	0.01467	457.45	0.03546
456.5	0.01473	457.4	0.02908
456.45	0.02154	457.35	0.02423
456.4	0.01408	457.3	0.02802
456.35	0.01556	457.25	0.02989
456.3	0.01277	457.2	0.02305
456.25	0.01391	457.15	0.02192
456.2	0.01778	457.1	0.01708
456.15	0.01155	457.05	0.02036
456.1	0.01285	457	0.02134
456.05	0.00849	456.95	0.02296
456	0.01235	456.9	0.0184
455.95	0.0096	456.85	0.01467
455.9	0.015	456.8	0.01431
455.85	0.00715	456.75	0.01611
455.8	0.01071	456.7	0.01358
455.75	0.01814	456.65	0.01405
455.7	0.01222	456.6	0.00711
455.65	0.01035	456.55	0.01271
455.6	0.01014	456.5	0.0069
455.55	0.01261	456.45	0.01414
455.5	0.0045	456.4	0.01557
455.45	0.01109	456.35	0.01028
455.4	0.01739	456.3	0.0128
455.35	0.00644	456.25	0.01477
455.3	0.00702	456.2	0.00731
455.25	0.0116	456.15	0.0129
455.2	0.01204	456.1	0.01798
455.15	0.01179	456.05	0.00842
455.1	0.01151	456	0.0156
455.05	0.01209	455.95	0.01053
455	0.00981	455.9	0.00982
454.95	0.00751	455.85	0.00543
454.9	0.00991	455.8	0.01199
454.85	0.00943	455.75	0.00995
454.8	0.01035	455.7	0.00551
454.75	0.01216	455.65	0.0107
454.7	0.0115	455.6	0.00786
454.65	0.00721	455.55	0.00201
454.6	0.01123	455.5	0.00795
454.55	0.00987	455.45	0.0091
454.5	0.00702	455.4	0.00183
454.45	0.00606	455.35	0.00116
454.4	0.01216	455.3	0.0023
454.35	0.01295	455.25	0.00835
454.3	0.01125	455.2	0.00377
454.25	0.0091	455.15	0.00637
454.2	0.00778	455.1	0.00836
454.15	0.0081	455.05	0.01234
454.1	0.0105	455	0.00609
454.05	0.01075	454.95	0.00826
454	0.00929	454.9	0.0068
453.95	0.01128	454.85	0.00268
453.9	0.00942	454.8	0.00644
453.85	0.00702	454.75	0.00686
453.8	0.0048	454.7	0.00103
453.75	0.00528	454.65	0.00467
453.7	0.00672	454.6	0.00649
453.65	0.00663	454.55	0.00621
453.6	0.00715	454.5	0.0083
453.55	0.00617	454.45	0.00947
453.5	0.00583	454.4	0.0056
453.45	0.00825	454.35	0.00405
453.4	0.00588	454.3	0.01425
453.35	0.00689	454.25	0.00401
453.3	0.00857	454.2	0.00675
453.25	0.00982	454.15	0.01126
453.2	0.00679	454.1	0.00254
453.15	0.00863	454.05	0.00657
453.1	0.00774	454	0.00473
453.05	0.00807	453.95	0.00782
453	0.0056	453.9	0.0104
452.95	0.0052	453.85	0.00845
452.9	0.00689	453.8	0.00642
452.85	0.01222	453.75	0.00225
452.8	0.01395	453.7	0.00776
452.75	0.0098	453.65	0.00845
452.7	0.00425	453.6	0.00341
452.65	0.00775	453.55	0.00642
452.6	0.00709	453.5	0.00252
452.55	0.00807	453.45	0.00239
452.5	0.00758	453.4	0.00398
452.45	0.00448	453.35	0.01101
452.4	0.00577	453.3	0.00624
452.35	0.01044	453.25	0.0073
452.3	0.01113	453.2	0.00612
452.25	0.01417	453.15	0.00545
452.2	0.01108	453.1	0.00355
452.15	0.01337	453.05	0.00748
452.1	0.01181	453	0.01008
452.05	0.00868	452.95	0.00266
452	0.00634	452.9	0.0027
451.95	0.01034	452.85	0.00535
451.9	0.00973	452.8	0.00399
451.85	0.00567	452.75	0
451.8	0.00886	452.7	0.00484
451.75	0.01392	452.65	0.00919
451.7	0.00608	452.6	0.00526
451.65	0.0053	452.55	0.00171
451.6	0.00674	452.5	0.00314
451.55	0.01213	452.45	0.0053
451.5	0.00695	452.4	0.0048
451.45	0.00559	452.35	0.00723
451.4	0.01004	452.3	0.00147
451.35	0.01273	452.25	0.00463
451.3	0.01052	452.2	0.00631
451.25	0.00842	452.15	0.00137
451.2	0.00475	452.1	0.00245
451.15	0.0092	452.05	0.0058
451.1	0.00984	452	0.00532
451.05	0.00673	451.95	0.00686
451	0.00689	451.9	0.00401
450.95	0.00688	451.85	0.00474
450.9	0.0078	451.8	0.00399
450.85	0.0137	451.75	0.00577
450.8	0.00955	451.7	0.00348
450.75	0.00476	451.65	0.00156
450.7	0	451.6	0.00434
450.65	0.00663	451.55	0.00343
450.6	0.00316	451.5	0.00617
450.55	0.01246	451.45	0.00119
450.5	0.00901	451.4	0.006
450.45	0.00674	451.35	0.005
450.4	0.01206	451.3	0.00618
450.35	0.0135	451.25	0.00296
450.3	0.00736	451.2	0.00426
450.25	0.00826	451.15	0.00349
450.2	0.00278	451.1	0.01041
450.15	0.00566	451.05	0.00622
450.1	0.00564	451	0.00413
450.05	0.00739	450.95	0.00571
450	0.00923	450.9	0.00606
449.95	0.00491	450.85	0.00438
449.9	0.00615	450.8	0.01078
449.85	0.01011	450.75	0.00818
449.8	0.00902	450.7	0.00323
449.75	0.00642	450.65	0.00195
449.7	0.0115	450.6	0.00473
449.65	0.01288	450.55	0.00462
449.6	0.00618	450.5	0.00371
449.55	0.01756	450.45	0.00921
449.5	0.01434	450.4	0.00592
449.45	0.01347	450.35	0.00301
449.4	0.0027	450.3	0.00466
449.35	0.01037	450.25	0.0089
449.3	0.00934	450.2	0.00708
449.25	0.00571	450.15	0.00551
449.2	0.00987	450.1	0.00175
449.15	0.00949	450.05	0.00379
449.1	0.00975	450	0.00649
449.05	0.00802	449.95	0.00583
449	0.00674	449.9	0.00772
448.95	0.0075	449.85	0.00902
448.9	0.00949	449.8	0.00412
448.85	0.00949	449.75	0.0079
448.8	0.00767	449.7	0.00152
448.75	0.00947	449.65	0.00198
448.7	0.00985	449.6	0.00426
448.65	0.0062	449.55	0.00256
448.6	0.00763	449.5	0.00673

## Sheet: fig 2f
4003.7	0.00179	0.02023	0.08663	0.03382
4002.55	0.00429	0.02266	0.08177	0.04111
4001.4	0.00182	0.0103	0.0775	0.02081
4000.25	0.00209	0.0101	0.08043	0.02051
3999.1	0.0027	0.0093	0.07204	0.01387
3997.95	0.00207	0.01242	0.07476	0.01921
3996.8	0.00289	0.00964	0.08	0.02479
3995.65	0.00131	0.00979	0.07521	0.03153
3994.5	0.00212	0.01045	0.07455	0.02254
3993.34	0.00147	0.01114	0.07863	0.02483
3992.19	0.00139	0.00697	0.07722	0.03486
3991.04	0.00125	0.00729	0.07687	0.02798
3989.89	0.00264	0.00441	0.07377	0.03073
3988.74	0.00147	0.0095	0.07405	0.02597
3987.58	0.00239	0.01084	0.07318	0.02098
3986.43	0.00265	0.01358	0.0762	0.02748
3985.28	0.00316	0.01264	0.07427	0.02202
3984.12	0.00145	0.00953	0.06949	0.02125
3982.97	0.00144	0.0057	0.07135	0.02705
3981.82	0.00188	0.00973	0.07585	0.02628
3980.66	0.00228	0.00767	0.07507	0.02317
3979.51	0.00125	0.00459	0.07188	0.01514
3978.36	0.00247	0.00926	0.07258	0.03405
3977.2	0.00106	0.00901	0.06949	0.02134
3976.05	0	0.00553	0.06925	0.02595
3974.89	0.0016	0.00493	0.07795	0.01676
3973.74	0.000941365	0.00868	0.07581	0.02067
3972.58	0.00213	0.00754	0.07178	0.02154
3971.43	0.00212	0.00766	0.07616	0.01937
3970.27	0.00198	0.00354	0.08055	0.03031
3969.11	0.00296	0.00882	0.0701	0.01995
3967.96	0.00258	0.00924	0.07374	0
3966.8	0.00185	0.00658	0.07402	0.00696
3965.64	0.0012	0.00653	0.07472	0.02092
3964.49	0.00153	0.00959	0.07101	0.02249
3963.33	0.00166	0.00964	0.07245	0.01635
3962.17	0.0021	0.00756	0.07346	0.01676
3961.02	0.00311	0.0087	0.07017	0.01786
3959.86	0.00113	0.00536	0.07465	0.03041
3958.7	0.00313	0.01191	0.07168	0.0238
3957.54	0.00251	0.01037	0.07248	0.01253
3956.38	0.00257	0.01205	0.07507	0.02321
3955.23	0.001	0.00455	0.06528	0.02688
3954.07	0.00266	0.00921	0.07207	0.01981
3952.91	0.00184	0.00665	0.06825	0.02208
3951.75	0.00105	0.00576	0.07546	0.02248
3950.59	0.00179	0.0053	0.07165	0.01705
3949.43	0.00114	0.00786	0.07067	0.01605
3948.27	0.00263	0.00862	0.07179	0.01995
3947.11	0.00442	0.00765	0.0662	0.01429
3945.95	0.00248	0.00973	0.06983	0.02379
3944.79	0.00152	0.00546	0.07315	0.01883
3943.63	0.00165	0.00649	0.07228	0.01853
3942.47	0.00368	0.01212	0.06481	0.01521
3941.31	0.00215	0.00964	0.07608	0.02166
3940.15	0.00102	0.00398	0.07354	0.01974
3938.98	0.000809523	0.00829	0.07361	0.02642
3937.82	0.00199	0.00757	0.07326	0.02915
3936.66	0.00303	0.00968	0.07165	0.02629
3935.5	0.000518545	0.00774	0.06827	0.01924
3934.34	0.0016	0.00435	0.06698	0.01871
3933.17	0.00244	0.00876	0.07448	0.02121
3932.01	0.00128	0.01299	0.07559	0.01603
3930.85	0.00147	0.00819	0.06991	0.01527
3929.68	0.0016	0.0078	0.07291	0.02985
3928.52	0.00149	0.00492	0.07256	0.01863
3927.36	0.00166	0.00811	0.07409	0.01833
3926.19	0.00266	0.01079	0.06685	0.01757
3925.03	0.00256	0.00697	0.07047	0.02029
3923.87	0.00191	0.0074	0.06835	0.02046
3922.7	0.00139	0.01038	0.06435	0.0183
3921.54	0.00203	0.00905	0.06818	0.02219
3920.37	0.00287	0.0091	0.06939	0.04325
3919.21	0.00245	0.0061	0.07301	0.0202
3918.04	0.00268	0.00847	0.06672	0.01944
3916.88	0.00332	0.00516	0.06981	0.02053
3915.71	0.00291	0.00828	0.06957	0.02163
3914.54	0.00151	0.00527	0.06714	0.01322
3913.38	0.00249	0.0068	0.07263	0.02985
3912.21	0.00197	0.00602	0.07155	0.02816
3911.04	0.00311	0.01021	0.06933	0.02322
3909.88	0.00277	0.0105	0.06982	0.02154
3908.71	0.00202	0.00981	0.06603	0.02217
3907.54	0.00279	0.00872	0.07016	0.03531
3906.38	0.00312	0.01234	0.07284	0.01509
3905.21	0.00217	0.00934	0.07312	0.02081
3904.04	0.00223	0.00556	0.07318	0.01728
3902.87	0.00155	0.01146	0.07003	0.03041
3901.7	0.00181	0.00306	0.07135	0.02386
3900.53	0.0013	0.00976	0.06528	0.02056
3899.37	0.00217	0.01145	0.06691	0.01309
3898.2	0.00236	0.00668	0.06895	0.01904
3897.03	0.00145	0.00734	0.06892	0.01111
3895.86	0.00279	0.00937	0.06857	0.01475
3894.69	0.00275	0.01288	0.07426	0.02092
3893.52	0.00274	0.00931	0.07173	0.01809
3892.35	0.00226	0.00964	0.06785	0.02288
3891.18	0.000301894	0.00852	0.06605	0.0168
3890.01	0.00218	0.00469	0.06601	0.00981
3888.84	0.00264	0.01201	0.06743	0.02314
3887.67	0.00129	0.0052	0.06449	0.01522
3886.49	0.00243	0.01115	0.07328	0.02232
3885.32	0.000941186	0.00438	0.06401	0.02133
3884.15	0.00248	0.00768	0.06865	0.02126
3882.98	0.00136	0.0064	0.06861	0.01981
3881.81	0.0021	0.00693	0.06868	0.01837
3880.63	0.00327	0.00876	0.06948	0.01184
3879.46	0.00124	0.00737	0.06945	0.02239
3878.29	0.00345	0.00863	0.06723	0.0161
3877.12	0.00224	0.00953	0.06596	0.02479
3875.94	0.0026	0.00835	0.06758	0.02749
3874.77	0.00135	0.00586	0.06807	0.01798
3873.6	0.00171	0.00792	0.06979	0.0163
3872.42	0.00086756	0.00731	0.0681	0.02753
3871.25	0.00277	0.00483	0.06765	0.00742
3870.07	0.00213	0.00509	0.06917	0.01818
3868.9	0.00169	0.00338	0.06386	0.01535
3867.72	0.00372	0.00864	0.06828	0.02588
3866.55	0.00184	0.0056	0.06638	0.02213
3865.38	0.00244	0.00452	0.06738	0.02621
3864.2	0.00159	0.01028	0.06817	0.01211
3863.02	0.00175	0.00517	0.07135	0.01757
3861.85	0.00248	0.00599	0.07048	0.02026
3860.67	0.00207	0.00702	0.06962	0.02158
3859.5	0.00207	0.00734	0.06432	0.02243
3858.32	0.00189	0.00883	0.06459	0.04099
3857.14	0.000981434	0.00519	0.06177	0.01196
3855.97	0.00208	0.00645	0.07176	0.02982
3854.79	0.00257	0.00977	0.06615	0.02424
3853.61	0.00253	0.0039	0.06405	0.01544
3852.43	0.00129	0.00186	0.06804	0.01515
3851.26	0.000713871	0.00635	0.06336	0.01991
3850.08	0.00168	0.00455	0.06704	0.0141
3848.9	0.000934446	0.00141	0.06722	0.02391
3847.72	0.0029	0.00669	0.06945	0.02247
3846.54	0.00179	0.00556	0.06612	0.01575
3845.36	0.00198	0.00216	0.06794	0.03449
3844.18	0.00174	0.00345	0.0646	0.02204
3843.01	0.000767369	0.00503	0.0656	0.0112
3841.83	0.002	0.00496	0.06773	0.01366
3840.65	0.00179	0.00166	0.071	0.01497
3839.47	0.00041367	0.00574	0.06262	0.01468
3838.29	0.00137	0.00431	0.06835	0.0059
3837.11	0.00177	0.00354	0.06832	0.01844
3835.93	0.00273	0.00719	0.06736	0.02708
3834.75	0.00152	0.00465	0.06362	0.01579
3833.56	0.00158	0	0.06853	0.01527
3832.38	0.000373987	0.00431	0.06581	0.02208
3831.2	0.00207	0.00543	0.06033	0.01514
3830.02	0.00126	0.0045	0.0677	0.02561
3828.84	0.00115	0.00416	0.06397	0.01913
3827.66	0.00325	0.00697	0.06486	0.01335
3826.47	0.00161	0.00945	0.06781	0.011
3825.29	0.00273	0.00653	0.06088	0.02374
3824.11	0.00246	0.00387	0.05941	0.02573
3822.92	0.00295	0.00526	0.06215	0.01698
3821.74	0.00211	0.00389	0.06397	0.01143
3820.56	0.00157	0.00518	0.06753	0.01525
3819.37	0.0021	0.00746	0.05897	0.01747
3818.19	0.00222	0.00524	0.06469	0.01695
3817.01	0.00178	0.00616	0.06733	0.00889
3815.82	0.00241	0.00367	0.06812	0.01728
3814.64	0.00137	0.00247	0.06264	0.01333
3813.45	0.00249	0.0033	0.06271	0.02377
3812.27	0.00235	0.00468	0.06832	0.01732
3811.08	0.00271	0.0054	0.06347	0.02159
3809.9	0.00221	0.00811	0.06723	0.01719
3808.71	0.00293	0.00682	0.06432	0.02625
3807.53	0.00193	0.00562	0.06583	0.01637
3806.34	0.00189	0.00545	0.06128	0.01745
3805.15	0.00135	0.0032	0.06432	0.01852
3803.97	0.00251	0.00696	0.06173	0.01572
3802.78	0.00336	0.0059	0.06651	0.00632
3801.59	0.00246	0.00501	0.06648	0.02106
3800.41	0.00146	0.00213	0.06603	0.02419
3799.22	0.00135	0.00381	0.06446	0.02207
3798.03	0.000480956	0.00463	0.06423	0.0211
3796.84	0.0015	0.00502	0.06051	0.02399
3795.65	0.00279	0.00779	0.06467	0.01823
3794.47	0.00301	0.00739	0.06259	0.01794
3793.28	0.00248	0.00765	0.05877	0.01583
3792.09	0.0025	0.00557	0.06508	0.01895
3790.9	0.00226	0.01045	0.06996	0.01229
3789.71	0.00292	0.00685	0.06154	0.01268
3788.52	0.00274	0.00648	0.06928	0.02944
3787.33	0.00201	0.00905	0.06433	0.02574
3786.14	0.00223	0.00552	0.06328	0.01385
3784.95	0.00193	0.00397	0.06519	0.01652
3783.76	0.00186	0.00861	0.05943	0.01781
3782.57	0.00109	0.00759	0.0641	0.01343
3781.38	0.000850923	0.00459	0.06652	0.02881
3780.19	0.0027	0.00643	0.06597	0.02511
3779	0.0019	0.00715	0.06175	0.02096
3777.81	0.00371	0.00442	0.0658	0.02044
3776.62	0.00267	0.00596	0.06658	0.01561
3775.42	0.00197	0.0083	0.06298	0.02417
3774.23	0.00378	0.00882	0.06468	0.02047
3773.04	0.000936003	0.00339	0.0624	0.022
3771.85	0.00251	0.00391	0.06043	0.01966
3770.65	0.00313	0.00914	0.06244	0.02141
3769.46	0.00144	0.00562	0.06465	0.02656
3768.27	0.00315	0.0071	0.05921	0.01947
3767.07	0.00249	0.00946	0.06876	0.00581
3765.88	0.00373	0.00792	0.06384	0.02138
3764.69	0.00109	0.00374	0.06014	0.01587
3763.49	0.00138	0.01054	0.06713	0.026
3762.3	0.00351	0.00624	0.06475	0.02209
3761.1	0.00219	0.00564	0.06604	0.02021
3759.91	0.00267	0.00512	0.06346	0.01743
3758.71	0.0023	0.00535	0.06252	0.01601
3757.52	0.00296	0.00714	0.06533	0.0225
3756.32	0.0014	0.00474	0.05909	0.0247
3755.13	0.00205	0.01152	0.06628	0.0287
3753.93	0.003	0.00565	0.05943	0.02592
3752.74	0.00329	0.00715	0.06591	0.01478
3751.54	0.002	0.00321	0.06079	0.02195
3750.34	0.00156	0.00563	0.06005	0.01827
3749.15	0.00264	0.00323	0.06103	0.0182
3747.95	0.00227	0.01108	0.05622	0.01543
3746.75	0.00115	0.0058	0.05822	0.02575
3745.55	0.00187	0.00707	0.06591	0.01462
3744.36	0.00278	0.00697	0.0612	0.01117
3743.16	0.00241	0.00752	0.06483	0.01517
3741.96	0.00316	0.00728	0.06225	0.02007
3740.76	0.00427	0.00901	0.05705	0.00985
3739.56	0.00239	0.00181	0.06117	0.02287
3738.37	0.00228	0.00377	0.058	0.02551
3737.17	0.00313	0.00778	0.06263	0.02387
3735.97	0.00106	0.00287	0.06827	0.01839
3734.77	0.00115	0.00352	0.06378	0.01968
3733.57	0.0014	0.01133	0.06294	0.02209
3732.37	0.0031	0.01048	0.06503	0.01279
3731.17	0.00185	0.00642	0.05608	0.02714
3729.97	0.00427	0.01115	0.06385	0.00883
3728.77	0.000752905	0.0038	0.06351	0.02273
3727.57	0.00222	0.00487	0.06095	0.02402
3726.37	0.00274	0.00663	0.05777	0.01584
3725.17	0.00221	0.00865	0.06088	0.02298
3723.96	0.00299	0.00757	0.05984	0.02314
3722.76	0.00203	0.00551	0.06203	0.0251
3721.56	0.00261	0.00603	0.06028	0.02166
3720.36	0.00179	0.00762	0.06429	0.01552
3719.16	0.00149	0.00586	0.0597	0.01478
3717.95	0.0037	0.00866	0.06311	0.01112
3716.75	0.00213	0.00683	0.0653	0.01983
3715.55	0.00209	0.0093	0.05223	0.01099
3714.34	0.00156	0.00666	0.05877	0.01767
3713.14	0.0026	0.0076	0.06126	0.01873
3711.94	0.00262	0.00909	0.06224	0.02361
3710.73	0.0032	0.00665	0.06109	0.00962
3709.53	0.00225	0.00476	0.05813	0.02617
3708.32	0.00165	0.00449	0.06143	0.0178
3707.12	0.00142	0.00719	0.0621	0.02334
3705.92	0.00138	0.00348	0.05682	0.00689
3704.71	0.00268	0.00267	0.06274	0.0167
3703.5	0.0029	0.01028	0.05817	0.01664
3702.3	0.00266	0.00855	0.05693	0.01299
3701.09	0.00256	0.00731	0.0571	0.01202
3699.89	0.0036	0.00721	0.05606	0.01488
3698.68	0.00352	0.00777	0.05864	0.01324
3697.47	0.00201	0.00997	0.05922	0.02887
3696.27	0.00282	0.00572	0.06271	0.02006
3695.06	0.00223	0.00957	0.05845	0.02
3693.85	0.00222	0.00932	0.06204	0.02352
3692.65	0.00235	0.00605	0.05919	0.01561
3691.44	0.00296	0.00889	0.05855	0.0245
3690.23	0.00321	0.00764	0.05993	0.01973
3689.02	0.00272	0.00775	0.06372	0.02549
3687.82	0.00297	0.00507	0.06177	0.01132
3686.61	0.00283	0.00849	0.05842	0.01551
3685.4	0.00328	0.00824	0.06392	0.01679
3684.19	0.00194	0.00491	0.06027	0.01762
3682.98	0.002	0.00827	0.05953	0.01286
3681.77	0.00114	0.00909	0.05849	0.01525
3680.56	0.00338	0.00641	0.05574	0.01317
3679.35	0.00123	0.00652	0.06245	0.01557
3678.14	0.00239	0.00929	0.059	0.01774
3676.93	0.00287	0.01154	0.06218	0.02661
3675.72	0.00332	0.00841	0.06044	0.02811
3674.51	0.00276	0.00917	0.06312	0.00437
3673.3	0.00249	0.01019	0.05826	0.02775
3672.09	0.00145	0.00531	0.05813	0.01786
3670.88	0.003	0.00779	0.06081	0.02204
3669.67	0.00296	0.01016	0.05817	0.02108
3668.45	0.00311	0.01383	0.05833	0.01655
3667.24	0.00314	0.01187	0.06392	0.0234
3666.03	0.00278	0.00626	0.05937	0.01575
3664.82	0.00244	0.01022	0.06486	0.01636
3663.6	0.00244	0.00839	0.06161	0.02633
3662.39	0.00344	0.01283	0.06308	0.02358
3661.18	0.00443	0.01023	0.06004	0.01995
3659.96	0.00391	0.00833	0.06121	0.02367
3658.75	0.00448	0.00793	0.06138	0.02673
3657.54	0.00428	0.01101	0.06185	0.02176
3656.32	0.00291	0.01432	0.06051	0.01902
3655.11	0.00268	0.01117	0.06058	0.01918
3653.89	0.00364	0.01493	0.06065	0.02824
3652.68	0.00221	0.01194	0.06121	0.03085
3651.46	0.00305	0.00734	0.06749	0.01742
3650.25	0.00252	0.00968	0.06835	0.02515
3649.03	0.00407	0.01221	0.05981	0.02909
3647.82	0.00341	0.01061	0.06618	0.02546
3646.6	0.00341	0.00934	0.06595	0.02873
3645.39	0.00236	0.01061	0.06721	0.02221
3644.17	0.00177	0.0055	0.06658	0.01815
3642.95	0.00296	0.0108	0.06585	0.02542
3641.74	0.00354	0.01072	0.06521	0.02846
3640.52	0.00418	0.01428	0.06818	0.02884
3639.3	0.00404	0.00972	0.05985	0.02411
3638.08	0.00303	0.01134	0.06391	0.03337
3636.87	0.00409	0.00772	0.06178	0.02553
3635.65	0.00444	0.0136	0.06235	0.03434
3634.43	0.0045	0.01043	0.06301	0.03272
3633.21	0.00375	0.01079	0.06328	0.03398
3631.99	0.00319	0.01178	0.07083	0.02948
3630.77	0.0037	0.01044	0.0683	0.04361
3629.55	0.00292	0.0102	0.07096	0.02601
3628.34	0.00333	0.01124	0.06793	0.03992
3627.12	0.00478	0.01055	0.06919	0.02965
3625.9	0.00267	0.00977	0.06437	0.02426
3624.68	0.00286	0.00959	0.06853	0.02442
3623.46	0.00408	0.00755	0.0656	0.04164
3622.24	0.00329	0.00911	0.06298	0.0378
3621.01	0.00406	0.01137	0.06713	0.03286
3619.79	0.0026	0.00818	0.06341	0.03744
3618.57	0.00466	0.01523	0.06606	0.02696
3617.35	0.00275	0.00908	0.06225	0.02978
3616.13	0.00464	0.01064	0.06719	0.02595
3614.91	0.00493	0.01136	0.07253	0.03517
3613.69	0.00273	0.00868	0.06672	0.04595
3612.46	0.00314	0.01152	0.0656	0.03725
3611.24	0.00403	0.00965	0.06556	0.02966
3610.02	0.00367	0.01268	0.06911	0.03026
3608.79	0.00434	0.01032	0.0639	0.03682
3607.57	0.00585	0.01217	0.06924	0.03233
3606.35	0.00262	0.01161	0.06682	0.03182
3605.12	0.00467	0.00816	0.0644	0.03529
3603.9	0.00396	0.00921	0.06466	0.035
3602.68	0.00379	0.01092	0.0686	0.03891
3601.45	0.00365	0.01017	0.07055	0.04326
3600.23	0.00355	0.00942	0.07082	0.0465
3599	0.00364	0.01104	0.06701	0.03693
3597.78	0.0036	0.0093	0.06449	0.04437
3596.55	0.0043	0.01239	0.07359	0.039
3595.33	0.00378	0.00857	0.06502	0.0471
3594.1	0.00496	0.00967	0.07074	0.03644
3592.88	0.00482	0.00921	0.06723	0.04343
3591.65	0.00366	0.00802	0.07097	0.02858
3590.42	0.00461	0.01066	0.06637	0.04108
3589.2	0.00563	0.01413	0.06733	0.03638
3587.97	0.00441	0.00961	0.07255	0.0416
3586.74	0.00395	0.01052	0.06944	0.03911
3585.51	0.00401	0.00998	0.06851	0.02626
3584.29	0.00477	0.01261	0.0662	0.03633
3583.06	0.00473	0.01134	0.07062	0.04331
3581.83	0.00395	0.01084	0.07118	0.04236
3580.6	0.00439	0.0119	0.07382	0.04669
3579.37	0.00593	0.01328	0.06983	0.03561
3578.14	0.00537	0.00926	0.06514	0.04259
3576.92	0.00543	0.01118	0.06362	0.04142
3575.69	0.00427	0.00998	0.07229	0.04773
3574.46	0.00381	0.00724	0.07325	0.04941
3573.23	0.00371	0.00987	0.06807	0.04648
3572	0.0046	0.0114	0.07288	0.0363
3570.77	0.00366	0.01148	0.06938	0.03865
3569.54	0.00455	0.01075	0.07241	0.041
3568.31	0.00301	0.01003	0.07455	0.05235
3567.08	0.003	0.00866	0.07066	0.05074
3565.84	0.00613	0.01358	0.07023	0.04276
3564.61	0.00417	0.01056	0.07316	0.05038
3563.38	0.0049	0.01095	0.06829	0.03845
3562.15	0.00515	0.0087	0.07102	0.04519
3560.92	0.00575	0.0116	0.07177	0.03809
3559.69	0.00507	0.00894	0.07361	0.04527
3558.45	0.00487	0.01152	0.07515	0.05068
3557.22	0.00518	0.00953	0.06703	0.0539
3555.99	0.00559	0.00982	0.07133	0.05909
3554.75	0.00622	0.01378	0.07219	0.04389
3553.52	0.00567	0.01328	0.07116	0.04908
3552.29	0.00499	0.01268	0.0732	0.05054
3551.05	0.00508	0.00744	0.06893	0.05069
3549.82	0.00453	0.01114	0.07717	0.05018
3548.58	0.00567	0.00896	0.07093	0.04266
3547.35	0.00643	0.01065	0.07818	0.05157
3546.12	0.0053	0.01063	0.07863	0.05632
3544.88	0.00584	0.01035	0.07564	0.05384
3543.64	0.0064	0.01271	0.07413	0.05289
3542.41	0.00544	0.0098	0.07193	0.04931
3541.17	0.00406	0.00917	0.08095	0.0604
3539.94	0.00437	0.01188	0.07324	0.04195
3538.7	0.00602	0.01294	0.07507	0.06135
3537.46	0.00413	0.01111	0.07041	0.06237
3536.23	0.00594	0.01127	0.07254	0.05989
3534.99	0.00581	0.01309	0.07477	0.05829
3533.75	0.0058	0.0138	0.0766	0.05362
3532.52	0.00627	0.01397	0.08482	0.04612
3531.28	0.00499	0.01043	0.07142	0.06003
3530.04	0.00682	0.01475	0.07669	0.04794
3528.8	0.0058	0.00966	0.07744	0.06513
3527.57	0.00528	0.014	0.0718	0.05654
3526.33	0.00601	0.01648	0.07628	0.06258
3525.09	0.00543	0.01168	0.0785	0.04897
3523.85	0.00466	0.01055	0.07896	0.06418
3522.61	0.00659	0.01262	0.07823	0.06847
3521.37	0.0075	0.01573	0.07908	0.05094
3520.13	0.00657	0.01245	0.08003	0.05959
3518.89	0.00653	0.01256	0.08126	0.05559
3517.65	0.00713	0.01235	0.07897	0.05094
3516.41	0.00677	0.01372	0.07697	0.05828
3515.17	0.00644	0.01088	0.07949	0.06257
3513.93	0.00713	0.01396	0.07964	0.06249
3512.69	0.00675	0.01226	0.07608	0.06046
3511.45	0.0069	0.01821	0.08349	0.05232
3510.2	0.00717	0.01276	0.08081	0.05791
3508.96	0.00732	0.01378	0.08341	0.07788
3507.72	0.00706	0.01613	0.0821	0.06234
3506.48	0.00595	0.01327	0.08579	0.06488
3505.24	0.00613	0.01337	0.08144	0.06937
3503.99	0.00615	0.01026	0.0816	0.07235
3502.75	0.00614	0.0127	0.08284	0.07075
3501.51	0.0074	0.01183	0.07889	0.06719
3500.26	0.0073	0.01607	0.08208	0.06625
3499.02	0.00489	0.01384	0.07764	0.05769
3497.78	0.00627	0.0118	0.08376	0.06457
3496.53	0.00819	0.01594	0.08392	0.07189
3495.29	0.00581	0.0123	0.0831	0.07268
3494.04	0.00691	0.01511	0.08218	0.06848
3492.8	0.00776	0.01746	0.08273	0.07992
3491.55	0.00576	0.01026	0.08972	0.07115
3490.31	0.00708	0.0148	0.08949	0.08237
3489.06	0.00599	0.01343	0.08125	0.07078
3487.82	0.00712	0.01627	0.08512	0.07418
3486.57	0.00787	0.01197	0.0882	0.07736
3485.32	0.006	0.01337	0.0866	0.07359
3484.08	0.00663	0.01398	0.08686	0.07504
3482.83	0.00836	0.01535	0.08584	0.07539
3481.58	0.00765	0.01372	0.08805	0.07033
3480.33	0.00764	0.01352	0.09386	0.07047
3479.09	0.00779	0.01362	0.08914	0.07972
3477.84	0.00899	0.01389	0.09154	0.06403
3476.59	0.00535	0.00981	0.0876	0.07133
3475.34	0.00865	0.02029	0.08367	0.07428
3474.1	0.00732	0.01292	0.08568	0.07724
3472.85	0.00715	0.0134	0.08408	0.0685
3471.6	0.00715	0.01389	0.08687	0.07947
3470.35	0.00846	0.01415	0.095	0.07831
3469.1	0.00839	0.01665	0.09195	0.08667
3467.85	0.00841	0.01751	0.09278	0.08118
3466.6	0.00683	0.01171	0.09255	0.07591
3465.35	0.0067	0.01182	0.08434	0.08081
3464.1	0.00704	0.0161	0.09792	0.08809
3462.85	0.00854	0.01677	0.09418	0.0759
3461.6	0.00878	0.01547	0.0852	0.09074
3460.35	0.00805	0.01366	0.09012	0.08331
3459.1	0.00719	0.01556	0.08882	0.08042
3457.84	0.00656	0.01065	0.09189	0.08661
3456.59	0.00803	0.01245	0.09204	0.08567
3455.34	0.00783	0.01322	0.08501	0.09402
3454.09	0.00754	0.01474	0.08915	0.08767
3452.84	0.00832	0.01359	0.08649	0.08241
3451.58	0.00938	0.01852	0.08577	0.08644
3450.33	0.00789	0.01121	0.09214	0.07967
3449.08	0.00798	0.01633	0.092	0.09059
3447.82	0.00813	0.01503	0.09768	0.09267
3446.57	0.00705	0.01651	0.08882	0.08547
3445.32	0.00754	0.01552	0.08868	0.09488
3444.06	0.00779	0.0161	0.08942	0.08618
3442.81	0.00803	0.01299	0.09975	0.08718
3441.55	0.00834	0.01432	0.09409	0.08818
3440.3	0.00858	0.01461	0.09337	0.09262
3439.04	0.0071	0.01254	0.08984	0.1003
3437.79	0.00815	0.01358	0.09765	0.08794
3436.53	0.00805	0.01294	0.09441	0.08958
3435.28	0.00898	0.01455	0.09747	0.09683
3434.02	0.00885	0.01697	0.08882	0.09158
3432.76	0.0085	0.01492	0.09342	0.10291
3431.51	0.00839	0.01616	0.09513	0.08539
3430.25	0.00983	0.01467	0.09025	0.08703
3429	0.00822	0.01484	0.09505	0.09233
3427.74	0.00684	0.01321	0.08659	0.10129
3426.48	0.00629	0.01157	0.0969	0.09239
3425.22	0.00845	0.01623	0.08903	0.09295
3423.96	0.00797	0.01304	0.08996	0.089
3422.71	0.00774	0.0133	0.09311	0.09451
3421.45	0.00839	0.01185	0.08785	0.10174
3420.19	0.00794	0.01402	0.08829	0.09349
3418.93	0.00903	0.01591	0.09367	0.09341
3417.67	0.00915	0.01324	0.09276	0.09977
3416.41	0.0078	0.01354	0.09349	0.09669
3415.15	0.00682	0.01029	0.09364	0.0951
3413.89	0.00715	0.01603	0.09679	0.09395
3412.63	0.00755	0.01698	0.09733	0.09516
3411.37	0.00832	0.01445	0.10057	0.09143
3410.11	0.00854	0.01446	0.09262	0.0892
3408.85	0.00715	0.01523	0.09383	0.10349
3407.59	0.0088	0.01586	0.09389	0.10599
3406.33	0.00748	0.01262	0.09356	0.08703
3405.07	0.00916	0.01714	0.09198	0.09189
3403.81	0.0084	0.0171	0.09454	0.09652
3402.54	0.00792	0.01758	0.09691	0.10051
3401.28	0.00832	0.01318	0.09754	0.08972
3400.02	0.00813	0.01444	0.09731	0.09906
3398.76	0.00905	0.01629	0.09419	0.09834
3397.49	0.00848	0.01457	0.09367	0.10404
3396.23	0.00823	0.01319	0.10287	0.10139
3394.97	0.00853	0.01392	0.09705	0.09403
3393.7	0.0097	0.0186	0.09922	0.10187
3392.44	0.00826	0.01352	0.09889	0.08595
3391.17	0.00878	0.02167	0.09501	0.09614
3389.91	0.00722	0.01716	0.09958	0.10568
3388.65	0.00849	0.01649	0.10175	0.10368
3387.38	0.00966	0.01598	0.09739	0.10338
3386.12	0.00838	0.01467	0.1008	0.10308
3384.85	0.01076	0.01661	0.09673	0.10471
3383.58	0.01029	0.01802	0.0989	0.10036
3382.32	0.00981	0.01689	0.0977	0.09792
3381.05	0.0081	0.01607	0.10035	0.1019
3379.79	0.00918	0.01646	0.09829	0.10929
3378.52	0.0097	0.01834	0.09633	0.10259
3377.25	0.00795	0.0147	0.09773	0.11126
3375.99	0.00859	0.01559	0.09625	0.10541
3374.72	0.00889	0.01917	0.09439	0.09872
3373.45	0.01007	0.01628	0.08888	0.11293
3372.18	0.00906	0.01744	0.09671	0.11434
3370.92	0.01027	0.01863	0.09302	0.11191
3369.65	0.00942	0.0184	0.09251	0.10521
3368.38	0.00988	0.01728	0.09879	0.10598
3367.11	0.00869	0.01396	0.10335	0.11976
3365.84	0.00896	0.01602	0.10159	0.1071
3364.57	0.01066	0.01953	0.09465	0.10062
3363.3	0.00872	0.01318	0.09087	0.10054
3362.03	0.00872	0.01592	0.09945	0.10088
3360.76	0.01041	0.0185	0.09864	0.11528
3359.49	0.00858	0.01763	0.09669	0.11328
3358.22	0.01015	0.01755	0.10076	0.10553
3356.95	0.00918	0.01581	0.09622	0.09779
3355.68	0.01022	0.01772	0.09532	0.10537
3354.41	0.0099	0.01786	0.09643	0.10614
3353.14	0.00915	0.01649	0.10184	0.12137
3351.87	0.01079	0.01953	0.09903	0.11278
3350.59	0.01034	0.01866	0.0965	0.12226
3349.32	0.01052	0.01498	0.09847	0.11452
3348.05	0.0093	0.01749	0.09298	0.11592
3346.78	0.00828	0.01545	0.09065	0.10904
3345.5	0.00889	0.02046	0.09758	0.11342
3344.23	0.00959	0.01712	0.09955	0.11907
3342.96	0.00902	0.01764	0.09769	0.12068
3341.68	0.00979	0.01926	0.10405	0.10701
3340.41	0.0087	0.0146	0.09255	0.1082
3339.14	0.00925	0.01736	0.09442	0.1113
3337.86	0.00958	0.01842	0.09657	0.11588
3336.59	0.00821	0.01715	0.09797	0.12238
3335.31	0.01073	0.01917	0.09029	0.10277
3334.04	0.00909	0.01624	0.09006	0.11139
3332.76	0.00896	0.01269	0.09289	0.10939
3331.49	0.00941	0.01545	0.09876	0.10825
3330.21	0.00965	0.0191	0.09919	0.11092
3328.94	0.00813	0.01405	0.0942	0.11529
3327.66	0.00966	0.01687	0.09568	0.10461
3326.38	0.00864	0.01658	0.08897	0.11194
3325.11	0.00792	0.01482	0.09084	0.11101
3323.83	0.00927	0.01705	0.09461	0.10436
3322.55	0.00821	0.01394	0.09371	0.09983
3321.27	0.00885	0.01295	0.09672	0.10081
3320	0.01004	0.0166	0.08868	0.11067
3318.72	0.0096	0.01625	0.09426	0.10212
3317.44	0.00898	0.01643	0.09269	0.10479
3316.16	0.01014	0.01645	0.10045	0.1064
3314.88	0.00884	0.01714	0.09395	0.11182
3313.6	0.00966	0.01619	0.09609	0.0963
3312.33	0.00756	0.01342	0.09273	0.10171
3311.05	0.00924	0.01678	0.08869	0.11135
3309.77	0.00905	0.01708	0.09293	0.10958
3308.49	0.01052	0.01698	0.09014	0.10696
3307.21	0.00974	0.01461	0.0939	0.10371
3305.93	0.01041	0.01675	0.09053	0.10193
3304.65	0.00969	0.01466	0.09173	0.10629
3303.36	0.00996	0.01275	0.09055	0.10114
3302.08	0.00918	0.01354	0.0925	0.09599
3300.8	0.00868	0.01436	0.09351	0.09907
3299.52	0.0096	0.01585	0.08967	0.103
3298.24	0.01063	0.01841	0.09191	0.11684
3296.96	0.00967	0.01611	0.08884	0.1003
3295.67	0.00798	0.0128	0.0924	0.10317
3294.39	0.00966	0.0153	0.0952	0.09909
3293.11	0.00959	0.01484	0.09242	0.10912
3291.83	0.00884	0.01217	0.08991	0.10524
3290.54	0.00963	0.01519	0.09328	0.10221
3289.26	0.00889	0.01482	0.09031	0.11266
3287.98	0.00931	0.01542	0.08837	0.09741
3286.69	0.00899	0.01688	0.0961	0.10891
3285.41	0.00923	0.01199	0.09947	0.0884
3284.12	0.00989	0.01357	0.09289	0.10327
3282.84	0.00826	0.01304	0.09314	0.1055
3281.55	0.00893	0.01488	0.08439	0.10774
3280.27	0.0103	0.01594	0.09618	0.11123
3278.98	0.01038	0.01493	0.08716	0.10336
3277.7	0.00945	0.01285	0.09515	0.10307
3276.41	0.00935	0.01424	0.09294	0.10067
3275.12	0.00843	0.01384	0.08997	0.10837
3273.84	0.00952	0.01353	0.08728	0.10618
3272.55	0.01015	0.01553	0.08923	0.11072
3271.26	0.01033	0.01699	0.09108	0.10938
3269.98	0.01035	0.01482	0.09633	0.10509
3268.69	0.00945	0.01752	0.08486	0.11152
3267.4	0.00996	0.01532	0.08747	0.08519
3266.11	0.00904	0.01267	0.09168	0.10988
3264.82	0.00943	0.01522	0.0873	0.1014
3263.54	0.01061	0.0133	0.09122	0.10363
3262.25	0.00956	0.01457	0.08712	0.09557
3260.96	0.00852	0.01386	0.08859	0.09402
3259.67	0.00979	0.01757	0.08978	0.10086
3258.38	0.00963	0.01412	0.09097	0.10267
3257.09	0.01078	0.01622	0.08857	0.09755
3255.8	0.00995	0.01539	0.09013	0.10439
3254.51	0.01101	0.01745	0.08642	0.1085
3253.22	0.00892	0.01708	0.08968	0.09039
3251.93	0.01053	0.01701	0.09294	0.11147
3250.64	0.01052	0.01427	0.08772	0.1028
3249.35	0.00896	0.01545	0.09135	0.11047
3248.05	0.01011	0.01581	0.08726	0.10682
3246.76	0.01129	0.01611	0.08864	0.10569
3245.47	0.01055	0.01686	0.08521	0.10393
3244.18	0.01206	0.01698	0.08724	0.10406
3242.89	0.00956	0.017	0.07779	0.10126
3241.59	0.01214	0.01951	0.09111	0.1041
3240.3	0.01012	0.01781	0.08656	0.10883
3239.01	0.00907	0.01714	0.08549	0.10017
3237.71	0.01059	0.0164	0.08423	0.10657
3236.42	0.01046	0.0161	0.08616	0.09729
3235.13	0.01018	0.01845	0.08415	0.10578
3233.83	0.01117	0.01763	0.08806	0.09713
3232.54	0.01031	0.01408	0.08511	0.09851
3231.24	0.00924	0.01411	0.08629	0.09174
3229.95	0.00959	0.01619	0.0871	0.09876
3228.65	0.00958	0.01498	0.08255	0.10954
3227.36	0.00976	0.0173	0.08552	0.10653
3226.06	0.01106	0.0206	0.08088	0.09914
3224.77	0.01068	0.01784	0.07906	0.11325
3223.47	0.01192	0.01451	0.08174	0.09731
3222.17	0.00978	0.01753	0.08527	0.1064
3220.88	0.00865	0.01522	0.08701	0.09673
3219.58	0.0121	0.01631	0.08388	0.10895
3218.28	0.01009	0.01651	0.08693	0.10636
3216.99	0.01087	0.0199	0.08446	0.08877
3215.69	0.00938	0.0153	0.08807	0.09744
3214.39	0.0111	0.01783	0.08176	0.09507
3213.09	0.01003	0.01574	0.08135	0.09353
3211.79	0.00865	0.01269	0.08871	0.08928
3210.5	0.01234	0.02135	0.08661	0.09087
3209.2	0.00997	0.01522	0.08095	0.09995
3207.9	0.01027	0.01558	0.07633	0.09154
3206.6	0.01089	0.01663	0.08041	0.10145
3205.3	0.01167	0.01699	0.08692	0.09471
3204	0.01109	0.01545	0.08567	0.10773
3202.7	0.01084	0.01532	0.0803	0.10307
3201.4	0.00986	0.01499	0.08035	0.09155
3200.1	0.01046	0.01354	0.07891	0.09688
3198.8	0.00993	0.01558	0.08112	0.09575
3197.49	0.01026	0.016	0.07463	0.0965
3196.19	0.01028	0.01461	0.08515	0.09808
3194.89	0.01024	0.01241	0.07652	0.08782
3193.59	0.01129	0.01855	0.0834	0.09522
3192.29	0.01086	0.01617	0.08084	0.09431
3190.99	0.01006	0.01283	0.07856	0.10212
3189.68	0.01008	0.01737	0.07917	0.08978
3188.38	0.01104	0.01779	0.0755	0.10444
3187.08	0.01185	0.0158	0.08031	0.08776
3185.77	0.00957	0.013	0.07748	0.09867
3184.47	0.0111	0.01426	0.07986	0.09154
3183.17	0.01155	0.01733	0.08029	0.08109
3181.86	0.01106	0.01681	0.07513	0.09718
3180.56	0.01072	0.01374	0.0777	0.08901
3179.25	0.01004	0.01497	0.07487	0.09121
3177.95	0.01013	0.01482	0.07791	0.08574
3176.64	0.01193	0.01752	0.07452	0.08484
3175.34	0.01014	0.01641	0.07532	0.09014
3174.03	0.00983	0.01307	0.08329	0.08861
3172.73	0.01193	0.01767	0.07562	0.07838
3171.42	0.01162	0.01803	0.07428	0.08452
3170.11	0.0104	0.01562	0.07768	0.09479
3168.81	0.01145	0.01553	0.07355	0.0796
3167.5	0.00963	0.01298	0.07603	0.08987
3166.19	0.01273	0.01682	0.07134	0.0962
3164.88	0.01007	0.0161	0.07502	0.08205
3163.58	0.01021	0.01304	0.07322	0.09934
3162.27	0.01014	0.01342	0.06575	0.09719
3160.96	0.01073	0.01414	0.07473	0.08285
3159.65	0.01003	0.01513	0.06558	0.09434
3158.34	0.01072	0.01222	0.07112	0.09943
3157.04	0.00917	0.0151	0.07081	0.08158
3155.73	0.01025	0.01237	0.07718	0.08645
3154.42	0.01141	0.01381	0.0699	0.0841
3153.11	0.00942	0.01707	0.07191	0.09228
3151.8	0.01085	0.0121	0.07549	0.07858
3150.49	0.01172	0.01584	0.07165	0.07292
3149.18	0.01111	0.01812	0.07273	0.08399
3147.87	0.00977	0.0145	0.0687	0.08989
3146.55	0.01229	0.01653	0.07071	0.09084
3145.24	0.01087	0.01548	0.07123	0.08581
3143.93	0.01092	0.01453	0.0711	0.08099
3142.62	0.01118	0.01207	0.07236	0.07699
3141.31	0.01192	0.01557	0.06992	0.08887
3140	0.01038	0.01482	0.06655	0.08405
3138.68	0.01133	0.01638	0.0692	0.078
3137.37	0.01138	0.01659	0.06712	0.08925
3136.06	0.01216	0.01689	0.06838	0.07825
3134.74	0.01113	0.0162	0.06529	0.09527
3133.43	0.01223	0.01492	0.06591	0.08036
3132.12	0.01024	0.01244	0.07402	0.08934
3130.8	0.01158	0.01423	0.06806	0.08885
3129.49	0.01094	0.01298	0.06599	0.07518
3128.17	0.01066	0.01366	0.06993	0.0856
3126.86	0.01176	0.01733	0.06777	0.08613
3125.54	0.01175	0.01456	0.06459	0.08071
3124.23	0.01159	0.01763	0.06465	0.08186
3122.91	0.01	0.01274	0.06979	0.08117
3121.6	0.01047	0.01495	0.06495	0.08068
3120.28	0.01208	0.0159	0.06232	0.08245
3118.97	0.01081	0.01796	0.06349	0.08093
3117.65	0.0105	0.01766	0.06613	0.07304
3116.33	0.01151	0.01287	0.06444	0.08796
3115.02	0.01147	0.01639	0.06136	0.08665
3113.7	0.01057	0.01353	0.06575	0.07445
3112.38	0.01098	0.01597	0.06627	0.07807
3111.06	0.0107	0.01814	0.07002	0.08907
3109.75	0.01108	0.01725	0.06611	0.08489
3108.43	0.01068	0.01246	0.06257	0.08255
3107.11	0.01007	0.01565	0.06383	0.08575
3105.79	0.01111	0.01553	0.06545	0.08506
3104.47	0.01224	0.01907	0.05961	0.08047
3103.15	0.01085	0.01512	0.06621	0.07957
3101.83	0.01207	0.01708	0.0635	0.09855
3100.51	0.01179	0.01738	0.0654	0.07839
3099.19	0.01118	0.01605	0.06362	0.07237
3097.87	0.01237	0.01747	0.06883	0.09011
3096.55	0.01245	0.01902	0.06419	0.08245
3095.23	0.01187	0.01679	0.06048	0.07828
3093.91	0.01094	0.01344	0.06348	0.07431
3092.59	0.01227	0.01641	0.06703	0.08856
3091.27	0.01375	0.01529	0.06626	0.08889
3089.94	0.01202	0.01823	0.06145	0.09453
3088.62	0.01227	0.01671	0.06261	0.07727
3087.3	0.01262	0.01618	0.0645	0.07883
3085.98	0.01023	0.01666	0.06337	0.07875
3084.65	0.01144	0.01373	0.06554	0.06661
3083.33	0.01057	0.01459	0.06091	0.08595
3082.01	0.01259	0.01646	0.06179	0.08158
3080.68	0.01118	0.0151	0.06258	0.08027
3079.36	0.01182	0.01507	0.062	0.07325
3078.04	0.01315	0.01961	0.06426	0.0844
3076.71	0.01219	0.01783	0.05991	0.08044
3075.39	0.01281	0.01627	0.06272	0.08159
3074.06	0.01241	0.01535	0.0592	0.076
3072.74	0.01222	0.019	0.06375	0.08041
3071.41	0.01221	0.01601	0.06308	0.08013
3070.08	0.01393	0.01894	0.06093	0.07556
3068.76	0.01318	0.0172	0.06283	0.08119
3067.43	0.01245	0.01531	0.06233	0.08213
3066.11	0.01227	0.01936	0.0623	0.0743
3064.78	0.01294	0.01807	0.0575	0.09339
3063.45	0.0129	0.01981	0.06168	0.06966
3062.13	0.01357	0.0176	0.06339	0.08467
3060.8	0.01265	0.01492	0.06124	0.08866
3059.47	0.01311	0.01725	0.06661	0.09286
3058.14	0.012	0.01646	0.06292	0.08402
3056.81	0.01336	0.01717	0.06252	0.08658
3055.49	0.01418	0.0214	0.06449	0.09281
3054.16	0.01381	0.01488	0.05869	0.0791
3052.83	0.01366	0.01642	0.05857	0.08655
3051.5	0.01418	0.01881	0.0621	0.07222
3050.17	0.01284	0.01554	0.06344	0.0874
3048.84	0.01363	0.02188	0.06213	0.09566
3047.51	0.01306	0.01646	0.06374	0.08317
3046.18	0.01257	0.01647	0.05886	0.09672
3044.85	0.01514	0.01845	0.06038	0.08383
3043.52	0.01463	0.01745	0.05833	0.09635
3042.19	0.01444	0.01963	0.06195	0.09708
3040.86	0.01375	0.02002	0.05982	0.08988
3039.52	0.01415	0.01728	0.06627	0.09874
3038.19	0.01364	0.02	0.055	0.08668
3036.86	0.0131	0.01782	0.05999	0.08436
3035.53	0.01418	0.01695	0.06151	0.09058
3034.19	0.01394	0.02054	0.05974	0.07954
3032.86	0.01443	0.01813	0.06044	0.08635
3031.53	0.01229	0.0154	0.05849	0.07796
3030.2	0.01338	0.01685	0.06247	0.09187
3028.86	0.01375	0.01856	0.05569	0.07374
3027.53	0.01271	0.01839	0.05501	0.07995
3026.19	0.01111	0.01595	0.05516	0.07703
3024.86	0.01263	0.01663	0.05604	0.08121
3023.52	0.01144	0.01734	0.05264	0.07303
3022.19	0.01326	0.01873	0.05807	0.06545
3020.85	0.01104	0.01642	0.05576	0.07368
3019.52	0.01277	0.0168	0.05618	0.07603
3018.18	0.01323	0.0176	0.05214	0.07778
3016.85	0.01305	0.01491	0.05184	0.07608
3015.51	0.01425	0.01961	0.05381	0.08531
3014.17	0.01412	0.01706	0.05741	0.08057
3012.84	0.01202	0.01674	0.05847	0.07645
3011.5	0.01295	0.01546	0.05716	0.0616
3010.16	0.01377	0.01632	0.05004	0.07103
3008.83	0.01452	0.02022	0.05319	0.06772
3007.49	0.01292	0.01947	0.05161	0.07876
3006.15	0.01506	0.02088	0.05594	0.0708
3004.81	0.01391	0.01916	0.05454	0.07739
3003.47	0.01313	0.01907	0.05333	0.07408
3002.13	0.01294	0.01861	0.0543	0.0742
3000.79	0.01376	0.01868	0.0539	0.0618
2999.46	0.01343	0.02009	0.0516	0.06516
2998.12	0.01336	0.01781	0.05148	0.06771
2996.78	0.01341	0.02124	0.04999	0.07429
2995.44	0.01454	0.02098	0.04996	0.07159
2994.09	0.01439	0.01959	0.05102	0.06889
2992.75	0.01353	0.01784	0.05515	0.08313
2991.41	0.01404	0.01787	0.05041	0.06692
2990.07	0.01424	0.01961	0.05554	0.0737
2988.73	0.0142	0.01622	0.05234	0.06374
2987.39	0.01443	0.01977	0.05557	0.07334
2986.05	0.01539	0.01875	0.05363	0.07044
2984.71	0.01388	0.02104	0.0536	0.06835
2983.36	0.01328	0.01768	0.05202	0.07814
2982.02	0.01509	0.01892	0.05453	0.07081
2980.68	0.01561	0.01919	0.05757	0.07899
2979.33	0.01419	0.02106	0.05953	0.07408
2977.99	0.0165	0.01891	0.05117	0.07642
2976.65	0.01491	0.01854	0.05349	0.0703
2975.3	0.01601	0.02202	0.05409	0.07364
2973.96	0.01477	0.01937	0.0556	0.07216
2972.61	0.01652	0.02049	0.05312	0.07148
2971.27	0.01577	0.01962	0.05906	0.0905
2969.92	0.01574	0.02446	0.0526	0.07514
2968.58	0.01614	0.02336	0.05067	0.06963
2967.23	0.01712	0.02445	0.05661	0.0782
2965.89	0.01629	0.0191	0.05368	0.07932
2964.54	0.01649	0.02344	0.05193	0.08246
2963.19	0.0177	0.02281	0.05614	0.08298
2961.85	0.01655	0.02148	0.05322	0.08632
2960.5	0.01628	0.02111	0.05734	0.08523
2959.15	0.01665	0.01975	0.05541	0.07572
2957.81	0.01775	0.0213	0.05421	0.07724
2956.46	0.01768	0.02416	0.05544	0.09603
2955.11	0.01717	0.02178	0.05639	0.09514
2953.76	0.01716	0.02065	0.06258	0.08643
2952.41	0.01896	0.02456	0.06291	0.08755
2951.06	0.01799	0.02349	0.05485	0.07885
2949.71	0.01944	0.02417	0.05482	0.07837
2948.37	0.01885	0.02467	0.05803	0.09914
2947.02	0.01991	0.02595	0.05214	0.0718
2945.67	0.01996	0.02422	0.06202	0.08835
2944.32	0.01744	0.02516	0.05334	0.08867
2942.97	0.01968	0.02467	0.05988	0.07357
2941.62	0.02054	0.02503	0.05777	0.0861
2940.26	0.02106	0.0237	0.06044	0.10164
2938.91	0.02128	0.02722	0.0622	0.08975
2937.56	0.02112	0.02633	0.05677	0.09407
2936.21	0.02117	0.02642	0.05989	0.09458
2934.86	0.02171	0.02629	0.05481	0.0905
2933.51	0.02007	0.0256	0.05802	0.08542
2932.15	0.02122	0.0274	0.06086	0.08814
2930.8	0.02078	0.02782	0.05606	0.09166
2929.45	0.02056	0.02751	0.05459	0.08218
2928.09	0.02183	0.02543	0.05465	0.0847
2926.74	0.02103	0.02561	0.0548	0.08002
2925.39	0.02024	0.02626	0.05306	0.08094
2924.03	0.01999	0.02488	0.05015	0.08226
2922.68	0.02004	0.02494	0.05793	0.08118
2921.32	0.01983	0.02504	0.04991	0.07112
2919.97	0.01921	0.02496	0.05257	0.07363
2918.61	0.0194	0.0228	0.04715	0.07914
2917.26	0.0191	0.02527	0.05106	0.08824
2915.9	0.01955	0.02577	0.04592	0.07918
2914.55	0.0194	0.02393	0.04867	0.07172
2913.19	0.01822	0.02162	0.04971	0.06945
2911.83	0.01906	0.02369	0.04744	0.06658
2910.48	0.01919	0.02234	0.05037	0.07468
2909.12	0.01938	0.02675	0.05033	0.07081
2907.76	0.01804	0.02451	0.04636	0.05997
2906.41	0.01791	0.02201	0.04597	0.07225
2905.05	0.01883	0.02303	0.05203	0.08253
2903.69	0.01841	0.02356	0.046	0.0701
2902.33	0.0191	0.02069	0.04444	0.06803
2900.97	0.01914	0.02408	0.04486	0.05959
2899.62	0.01908	0.02374	0.04411	0.07146
2898.26	0.01791	0.02358	0.04319	0.05845
2896.9	0.01903	0.02452	0.04235	0.06792
2895.54	0.01739	0.0198	0.04625	0.06705
2894.18	0.01843	0.02284	0.04417	0.0614
2892.82	0.01888	0.02306	0.04047	0.05417
2891.46	0.01748	0.02301	0.04384	0.06165
2890.1	0.0188	0.02268	0.04738	0.07191
2888.74	0.01798	0.02249	0.04333	0.0607
2887.37	0.01762	0.02164	0.04946	0.05625
2886.01	0.01744	0.02194	0.04809	0.06154
2884.65	0.01806	0.02337	0.04466	0.07
2883.29	0.01753	0.02352	0.04329	0.05642
2881.93	0.01744	0.02446	0.04826	0.06032
2880.56	0.01754	0.01938	0.04609	0.0662
2879.2	0.01837	0.02264	0.0424	0.06235
2877.84	0.01902	0.02323	0.04638	0.06664
2876.48	0.01641	0.01861	0.04447	0.06616
2875.11	0.01842	0.02599	0.04391	0.05974
2873.75	0.01879	0.02319	0.04557	0.06779
2872.38	0.01768	0.02297	0.0442	0.06038
2871.02	0.01845	0.02367	0.04221	0.05674
2869.65	0.01708	0.02147	0.0445	0.06142
2868.29	0.01629	0.02269	0.04732	0.06511
2866.92	0.01689	0.02262	0.04711	0.06265
2865.56	0.01751	0.02192	0.0404	0.05802
2864.19	0.01719	0.02411	0.0425	0.06309
2862.83	0.01836	0.02034	0.04532	0.05609
2861.46	0.01659	0.0209	0.04618	0.06195
2860.09	0.01681	0.02023	0.0417	0.05396
2858.73	0.01689	0.02262	0.04371	0.07486
2857.36	0.01748	0.02232	0.04395	0.05796
2855.99	0.01782	0.02233	0.04285	0.06738
2854.63	0.01844	0.02335	0.04807	0.05682
2853.26	0.0169	0.02325	0.04412	0.06169
2851.89	0.01649	0.01948	0.04036	0.06141
2850.52	0.01556	0.01936	0.04015	0.06391
2849.15	0.01604	0.01989	0.04225	0.06561
2847.78	0.01629	0.02457	0.04338	0.06138
2846.42	0.01585	0.02092	0.04077	0.05439
2845.04	0.01483	0.01907	0.0379	0.04859
2843.68	0.01476	0.01935	0.03884	0.06194
2842.31	0.01553	0.01773	0.03731	0.05733
2840.94	0.0148	0.01769	0.03985	0.06515
2839.56	0.01387	0.02151	0.04133	0.06092
2838.19	0.01487	0.01972	0.03819	0.05966
2836.82	0.01345	0.01837	0.0418	0.06057
2835.45	0.01304	0.01773	0.04363	0.05754
2834.08	0.01484	0.01814	0.04085	0.06417
2832.71	0.01454	0.02176	0.03825	0.05739
2831.34	0.01313	0.01709	0.03999	0.06362
2829.96	0.0132	0.01613	0.03837	0.05211
2828.59	0.01543	0.02257	0.04312	0.05972
2827.22	0.01344	0.01914	0.04025	0.06378
2825.84	0.01392	0.01854	0.03943	0.05622
2824.47	0.01233	0.01786	0.03293	0.07052
2823.1	0.01373	0.02137	0.03609	0.06906
2821.72	0.01504	0.02135	0.03801	0.0678
2820.35	0.01273	0.02021	0.0401	0.06655
2818.97	0.01313	0.01576	0.03706	0.06942
2817.6	0.0136	0.01967	0.03659	0.06128
2816.22	0.01339	0.01516	0.03621	0.0496
2814.85	0.01496	0.02181	0.03742	0.05483
2813.47	0.01375	0.01928	0.0396	0.06459
2812.1	0.01348	0.01646	0.03815	0.05488
2810.72	0.01247	0.0174	0.03918	0.05303
2809.35	0.01466	0.01937	0.03597	0.06514
2807.97	0.01339	0.01683	0.03841	0.05622
2806.59	0.01381	0.0204	0.04121	0.06184
2805.21	0.01317	0.01667	0.03809	0.05725
2803.84	0.01408	0.01807	0.03426	0.06405
2802.46	0.0131	0.01927	0.03582	0.04689
2801.08	0.01412	0.0195	0.03879	0.05565
2799.7	0.01376	0.0166	0.03912	0.04478
2798.32	0.01481	0.01637	0.03697	0.06158
2796.95	0.01383	0.01976	0.03747	0.05562
2795.57	0.01451	0.01703	0.03444	0.05672
2794.19	0.01413	0.01803	0.03829	0.05527
2792.81	0.01255	0.01721	0.03861	0.06813
2791.43	0.01402	0.01394	0.03814	0.06413
2790.05	0.01307	0.01486	0.03767	0.05485
2788.67	0.015	0.01711	0.03544	0.0585
2787.29	0.01428	0.01702	0.03506	0.05822
2785.9	0.01227	0.01555	0.0367	0.05971
2784.52	0.01315	0.01706	0.03456	0.05964
2783.14	0.01422	0.01834	0.03866	0.05134
2781.76	0.0137	0.01738	0.03265	0.04813
2780.38	0.01357	0.01792	0.03676	0.04532
2779	0.01391	0.01767	0.03567	0.05561
2777.61	0.01535	0.02045	0.04259	0.05534
2776.23	0.01386	0.01941	0.03851	0.05957
2774.85	0.01328	0.01564	0.03804	0.05734
2773.46	0.01333	0.01729	0.03652	0.05668
2772.08	0.01317	0.01647	0.03649	0.05934
2770.7	0.01481	0.01596	0.03497	0.04715
2769.31	0.01338	0.01529	0.03942	0.05684
2767.93	0.01303	0.0177	0.0407	0.05325
2766.54	0.01302	0.01414	0.03461	0.05884
2765.16	0.01333	0.01986	0.03362	0.05818
2763.77	0.01363	0.01678	0.0378	0.06162
2762.38	0.01396	0.0208	0.03382	0.05588
2761	0.0135	0.01622	0.03555	0.06146
2759.61	0.01459	0.01917	0.03543	0.045
2758.23	0.0139	0.01518	0.03479	0.06131
2756.84	0.01372	0.01966	0.03888	0.05187
2755.45	0.0132	0.01723	0.03867	0.05024
2754.07	0.01382	0.01757	0.03444	0.06108
2752.68	0.01157	0.01563	0.03677	0.0573
2751.29	0.01312	0.01648	0.03806	0.07398
2749.9	0.01464	0.01829	0.03785	0.06026
2748.51	0.01378	0.01763	0.0387	0.0561
2747.12	0.014	0.01697	0.03298	0.05563
2745.74	0.01464	0.01765	0.03697	0.06529
2744.35	0.01369	0.02201	0.03327	0.05704
2742.96	0.01578	0.02059	0.0321	0.0663
2741.57	0.01339	0.01958	0.03479	0.05513
2740.18	0.01426	0.02106	0.04018	0.0537
2738.79	0.01414	0.01904	0.03481	0.05304
2737.4	0.01543	0.02117	0.03251	0.06521
2736.01	0.01477	0.01918	0.03379	0.05619
2734.61	0.01419	0.02015	0.0363	0.06253
2733.22	0.01401	0.01976	0.03714	0.06945
2731.83	0.01482	0.01791	0.03659	0.05869
2730.44	0.01487	0.01863	0.03394	0.05064
2729.05	0.01517	0.01749	0.03539	0.06397
2727.66	0.01332	0.0155	0.03894	0.06079
2726.26	0.0145	0.01965	0.03271	0.05566
2724.87	0.01452	0.01558	0.03295	0.06219
2723.48	0.01507	0.01863	0.03946	0.05861
2722.08	0.0156	0.0209	0.03647	0.0665
2720.69	0.01483	0.01776	0.03295	0.05128
2719.29	0.01409	0.01785	0.03545	0.05703
2717.9	0.01475	0.01964	0.03289	0.0587
2716.5	0.01387	0.01785	0.03373	0.05998
2715.11	0.01459	0.01876	0.03745	0.05118
2713.71	0.01495	0.02041	0.02993	0.05866
2712.32	0.01452	0.01859	0.03504	0.07021
2710.92	0.01468	0.01925	0.03483	0.05773
2709.53	0.01374	0.0178	0.03637	0.06657
2708.13	0.01451	0.01784	0.03564	0.06107
2706.73	0.01295	0.01881	0.0303	0.05692
2705.34	0.01433	0.0209	0.03663	0.07195
2703.94	0.0142	0.01754	0.03886	0.0618
2702.54	0.01397	0.01899	0.03326	0.05147
2701.15	0.01486	0.01981	0.03602	0.05759
2699.75	0.01493	0.01985	0.03921	0.06003
2698.35	0.01335	0.01757	0.03674	0.05531
2696.95	0.01551	0.01988	0.03567	0.06741
2695.55	0.01398	0.01919	0.0359	0.05303
2694.15	0.01338	0.01839	0.03465	0.06184
2692.75	0.01522	0.02028	0.03549	0.05771
2691.35	0.01516	0.02032	0.03312	0.05415
2689.95	0.01419	0.02017	0.033	0.06412
2688.55	0.01362	0.01634	0.03488	0.04763
2687.15	0.01496	0.01845	0.03407	0.05064
2685.75	0.01543	0.0199	0.03421	0.05269
2684.35	0.01553	0.02038	0.03844	0.0671
2682.95	0.01451	0.02037	0.03711	0.05254
2681.55	0.01318	0.01635	0.03499	0.0517
2680.15	0.01502	0.01841	0.02811	0.05857
2678.75	0.01456	0.02049	0.03641	0.05444
2677.34	0.01452	0.01967	0.03083	0.05745
2675.94	0.016	0.02063	0.03297	0.05969
2674.54	0.01389	0.01852	0.03285	0.04515
2673.13	0.01292	0.01889	0.0343	0.06204
2671.73	0.01583	0.02159	0.03271	0.07063
2670.33	0.01734	0.02317	0.03727	0.05013
2668.92	0.01449	0.01743	0.03845	0.06489
2667.52	0.01303	0.01635	0.03193	0.06731
2666.11	0.01545	0.02158	0.03839	0.04914
2664.71	0.0155	0.02168	0.03403	0.06254
2663.3	0.01445	0.01913	0.03071	0.06785
2661.9	0.0161	0.02408	0.03415	0.05642
2660.49	0.01603	0.0184	0.03325	0.06096
2659.09	0.01412	0.01975	0.03755	0.06146
2657.68	0.01411	0.01653	0.03406	0.05888
2656.27	0.01488	0.02073	0.03679	0.05803
2654.87	0.01484	0.01915	0.03357	0.06199
2653.46	0.01481	0.01741	0.0325	0.04635
2652.05	0.01342	0.01734	0.02547	0.05262
2650.64	0.01339	0.01844	0.03227	0.06272
2649.24	0.01341	0.01904	0.03034	0.0588
2647.83	0.01326	0.02164	0.03014	0.07063
2646.42	0.01453	0.02188	0.0321	0.06499
2645.01	0.01408	0.02128	0.03828	0.06126
2643.6	0.01474	0.02035	0.03911	0.05869
2642.19	0.01487	0.02072	0.03313	0.06917
2640.78	0.01553	0.01885	0.03241	0.06007
2639.37	0.01499	0.02017	0.03462	0.0644
2637.96	0.01475	0.0219	0.03192	0.05551
2636.55	0.01449	0.02078	0.03448	0.06041
2635.14	0.01518	0.0201	0.03367	0.05842
2633.73	0.01587	0.02072	0.03519	0.06083
2632.32	0.01538	0.02188	0.0343	0.06727
2630.91	0.01459	0.01836	0.03315	0.05915
2629.5	0.01508	0.02115	0.03407	0.05524
2628.08	0.01532	0.0225	0.03637	0.05899
2626.67	0.01495	0.01854	0.03246	0.05681
2625.26	0.01466	0.02208	0.03278	0.06056
2623.84	0.01307	0.01488	0.02991	0.06623
2622.43	0.01515	0.02039	0.03427	0.06462
2621.02	0.01583	0.01968	0.02933	0.06148
2619.6	0.01568	0.02106	0.03455	0.06848
2618.19	0.01551	0.01971	0.03229	0.05999
2616.78	0.01505	0.0215	0.03312	0.05953
2615.36	0.01535	0.02063	0.03524	0.05333
2613.95	0.01467	0.01973	0.03581	0.05803
2612.53	0.01446	0.02141	0.03389	0.06579
2611.12	0.01479	0.01732	0.03223	0.05769
2609.7	0.01478	0.01847	0.03744	0.06755
2608.28	0.01482	0.01807	0.03071	0.05677
2606.87	0.0154	0.02168	0.03051	0.05574
2605.45	0.01522	0.02048	0.03271	0.06273
2604.03	0.01529	0.02052	0.02805	0.05368
2602.62	0.01592	0.02151	0.03059	0.07803
2601.2	0.01491	0.01964	0.03151	0.05944
2599.78	0.01526	0.01954	0.03422	0.06204
2598.36	0.01673	0.02127	0.03325	0.06081
2596.95	0.01569	0.02111	0.03554	0.06493
2595.53	0.01487	0.02032	0.03062	0.06886
2594.11	0.01539	0.02241	0.03393	0.0522
2592.69	0.01507	0.02013	0.0309	0.05631
2591.27	0.01368	0.01793	0.03259	0.06557
2589.85	0.01425	0.02034	0.03624	0.06073
2588.43	0.01449	0.01735	0.02945	0.05304
2587.01	0.01564	0.0199	0.03447	0.06458
2585.59	0.01591	0.01873	0.03632	0.05783
2584.17	0.01499	0.02177	0.03047	0.06214
2582.75	0.01586	0.01892	0.02762	0.06586
2581.33	0.01566	0.0218	0.03581	0.05951
2579.9	0.01548	0.01919	0.03526	0.06571
2578.48	0.0163	0.02124	0.02985	0.05193
2577.06	0.01621	0.02161	0.03529	0.06004
2575.64	0.01664	0.02375	0.03457	0.07022
2574.21	0.01428	0.01693	0.03523	0.05665
2572.79	0.01552	0.01749	0.03315	0.05961
2571.37	0.0154	0.02208	0.03235	0.06182
2569.94	0.01644	0.02046	0.03428	0.06117
2568.52	0.01618	0.02141	0.0305	0.07913
2567.1	0.01362	0.01754	0.03192	0.06272
2565.67	0.01613	0.02086	0.0336	0.07404
2564.25	0.01568	0.02123	0.02469	0.04966
2562.82	0.0147	0.01673	0.02825	0.0678
2561.4	0.01574	0.02134	0.03325	0.07266
2559.97	0.01518	0.02135	0.03689	0.0629
2558.54	0.01646	0.02142	0.03055	0.06112
2557.12	0.01576	0.01785	0.03095	0.06806
2555.69	0.01526	0.01968	0.03433	0.06115
2554.27	0.01555	0.01964	0.03225	0.06923
2552.84	0.0154	0.01907	0.03095	0.05986
2551.41	0.01548	0.02126	0.02896	0.05959
2549.98	0.01447	0.01932	0.03455	0.0652
2548.56	0.0146	0.02062	0.03273	0.05319
2547.13	0.01396	0.02072	0.03262	0.04857
2545.7	0.01472	0.02076	0.03497	0.06686
2544.27	0.01482	0.01945	0.03341	0.06716
2542.84	0.01572	0.02128	0.02896	0.072
2541.41	0.01642	0.01918	0.03156	0.05565
2539.98	0.01567	0.02078	0.03154	0.05973
2538.55	0.01464	0.01877	0.03032	0.0693
2537.12	0.01543	0.01903	0.03029	0.05674
2535.69	0.01506	0.02151	0.03187	0.05799
2534.26	0.01621	0.02031	0.03252	0.06793
2532.83	0.01634	0.02082	0.03547	0.07503
2531.4	0.01657	0.02124	0.03229	0.06928
2529.97	0.01505	0.01696	0.02836	0.04993
2528.54	0.01718	0.01908	0.03045	0.07894
2527.1	0.01643	0.02317	0.03127	0.06678
2525.67	0.01521	0.01905	0.02861	0.06594
2524.24	0.01682	0.02303	0.03512	0.07625
2522.8	0.01574	0.02258	0.03322	0.08051
2521.37	0.01614	0.0215	0.03141	0.06722
2519.94	0.01671	0.02299	0.02629	0.06752
2518.5	0.01621	0.01983	0.02957	0.07008
2517.07	0.01606	0.02096	0.03107	0.07283
2515.64	0.01608	0.02035	0.03112	0.06935
2514.2	0.01513	0.02028	0.03762	0.06908
2512.77	0.01715	0.02119	0.02937	0.06392
2511.33	0.01824	0.02274	0.03637	0.06968
2509.89	0.0154	0.01991	0.02982	0.06037
2508.46	0.01616	0.01984	0.03411	0.07027
2507.02	0.01788	0.02444	0.03171	0.05758
2505.59	0.01647	0.0197	0.03177	0.06917
2504.15	0.01569	0.01955	0.03605	0.07888
2502.71	0.01585	0.02027	0.03391	0.07391
2501.28	0.01844	0.02422	0.03041	0.07195
2499.84	0.01668	0.02287	0.0341	0.0713
2498.4	0.01708	0.02004	0.03069	0.07912
2496.96	0.01816	0.02322	0.03235	0.07434
2495.52	0.01492	0.01928	0.0363	0.08065
2494.08	0.0168	0.02008	0.03103	0.08358
2492.65	0.0172	0.02298	0.0326	0.08049
2491.21	0.01738	0.02117	0.02818	0.07759
2489.77	0.01699	0.02148	0.03465	0.07149
2488.33	0.01657	0.02207	0.03167	0.07386
2486.89	0.01768	0.02219	0.03628	0.07922
2485.45	0.01742	0.02395	0.04064	0.06637
2484	0.01757	0.02165	0.03546	0.07305
2482.56	0.01658	0.01963	0.03484	0.0771
2481.12	0.01758	0.02311	0.03346	0.0727
2479.68	0.0173	0.02365	0.03284	0.07206
2478.24	0.01748	0.02267	0.03113	0.07536
2476.8	0.01722	0.02392	0.03321	0.07959
2475.35	0.01751	0.02136	0.02871	0.06826
2473.91	0.01728	0.02313	0.03728	0.07174
2472.47	0.01771	0.02242	0.03244	0.07541
2471.03	0.01851	0.02207	0.03208	0.07345
2469.58	0.01771	0.02005	0.03247	0.07094
2468.14	0.0183	0.0222	0.03412	0.0776
2466.69	0.01679	0.02182	0.03249	0.06628
2465.25	0.01637	0.02076	0.03103	0.06827
2463.8	0.01593	0.01883	0.03201	0.0753
2462.36	0.01654	0.02127	0.03367	0.06474
2460.91	0.01754	0.02469	0.0333	0.06391
2459.47	0.01669	0.01969	0.02949	0.07113
2458.02	0.01662	0.02083	0.03223	0.07254
2456.58	0.01751	0.02159	0.03287	0.07901
2455.13	0.0166	0.02118	0.03217	0.06752
2453.68	0.01713	0.02259	0.03256	0.068
2452.24	0.01693	0.01907	0.03069	0.06568
2450.79	0.0179	0.02229	0.02746	0.06897
2449.34	0.01757	0.02267	0.02937	0.0616
2447.89	0.01679	0.02001	0.02833	0.06339
2446.44	0.01773	0.02418	0.02713	0.05566
2445	0.01653	0.0195	0.03415	0.06884
2443.55	0.01654	0.0202	0.03076	0.05644
2442.1	0.01808	0.02112	0.03182	0.06588
2440.65	0.01775	0.02031	0.02928	0.06729
2439.2	0.01657	0.01974	0.02891	0.06702
2437.75	0.01754	0.02279	0.03023	0.05986
2436.3	0.01676	0.02184	0.03028	0.07824
2434.85	0.01751	0.01919	0.02723	0.06679
2433.4	0.01756	0.02049	0.03332	0.07062
2431.95	0.01776	0.02097	0.03329	0.06663
2430.5	0.01689	0.02246	0.03092	0.06357
2429.04	0.01742	0.0202	0.03298	0.08026
2427.59	0.0183	0.024	0.02969	0.06676
2426.14	0.01843	0.02326	0.0305	0.07134
2424.69	0.01801	0.02344	0.03105	0.05934
2423.23	0.018	0.02138	0.02902	0.07918
2421.78	0.01658	0.02008	0.03108	0.06235
2420.33	0.01836	0.02274	0.02896	0.0606
2418.87	0.01783	0.02092	0.02642	0.06573
2417.42	0.01728	0.01989	0.02815	0.06918
2415.96	0.01735	0.0205	0.03054	0.06687
2414.51	0.01775	0.02295	0.03336	0.06661
2413.06	0.01725	0.01933	0.02856	0.0695
2411.6	0.01783	0.02167	0.03321	0.06589
2410.14	0.01839	0.02147	0.02809	0.06749
2408.69	0.01673	0.01955	0.02747	0.07131
2407.23	0.01769	0.02172	0.02912	0.06194
2405.78	0.01747	0.02099	0.02733	0.06205
2404.32	0.01664	0.02041	0.03256	0.05826
2402.86	0.01842	0.02304	0.02869	0.06653
2401.41	0.01619	0.01914	0.02708	0.07202
2399.95	0.01732	0.02187	0.0273	0.06044
2398.49	0.0193	0.02536	0.02385	0.06796
2397.03	0.01835	0.02286	0.02349	0.06992
2395.57	0.01844	0.02223	0.02763	0.05464
2394.12	0.01911	0.02207	0.03036	0.06531
2392.66	0.01826	0.02083	0.02849	0.07061
2391.2	0.01779	0.02163	0.03038	0.06942
2389.74	0.01867	0.02268	0.0326	0.0686
2388.28	0.01882	0.02327	0.03174	0.06426
2386.82	0.01843	0.02318	0.02988	0.07288
2385.36	0.01845	0.02356	0.02885	0.06891
2383.9	0.01766	0.02221	0.03606	0.05699
2382.44	0.01797	0.02229	0.02671	0.05987
2380.97	0.01877	0.02427	0.03134	0.07182
2379.51	0.01916	0.02596	0.0284	0.07081
2378.05	0.01864	0.02548	0.03394	0.07739
2376.59	0.01841	0.02274	0.0325	0.06954
2375.12	0.0194	0.02445	0.02981	0.05966
2373.66	0.01877	0.02606	0.02679	0.07012
2372.2	0.01811	0.0208	0.03208	0.0706
2370.74	0.01789	0.02185	0.02939	0.06183
2369.27	0.01822	0.02404	0.03061	0.07321
2367.81	0.01811	0.02304	0.03133	0.07516
2366.34	0.01877	0.02185	0.03346	0.06825
2364.88	0.01808	0.02403	0.02504	0.07408
2363.41	0.01875	0.02337	0.03273	0.06883
2361.95	0.01903	0.02368	0.03196	0.06505
2360.48	0.01886	0.02316	0.0335	0.06571
2359.02	0.01847	0.02215	0.02858	0.06932
2357.55	0.019	0.02206	0.0249	0.07072
2356.09	0.01985	0.02362	0.03068	0.06935
2354.62	0.01965	0.02521	0.02816	0.06005
2353.15	0.01999	0.02237	0.0302	0.07988
2351.69	0.02073	0.02449	0.03175	0.05989
2350.22	0.01945	0.02194	0.02617	0.06718
2348.75	0.01947	0.02361	0.03012	0.06342
2347.28	0.0189	0.02384	0.02636	0.05837
2345.81	0.01923	0.02332	0.02724	0.06897
2344.34	0.02032	0.02376	0.0268	0.06687
2342.88	0.01967	0.02567	0.02619	0.06587
2341.41	0.01802	0.0237	0.02682	0.06855
2339.94	0.02005	0.0243	0.02969	0.05853
2338.47	0.01977	0.02397	0.0295	0.0763
2337	0.01981	0.02633	0.02757	0.07199
2335.53	0.01983	0.02525	0.03002	0.05683
2334.06	0.02064	0.02633	0.0285	0.0698
2332.58	0.01935	0.02459	0.02211	0.07211
2331.11	0.02017	0.02351	0.03034	0.06799
2329.64	0.02128	0.02776	0.03337	0.08187
2328.17	0.02135	0.02713	0.03342	0.07867
2326.7	0.02011	0.0231	0.03174	0.07216
2325.22	0.01999	0.02399	0.02536	0.06804
2323.75	0.0196	0.02545	0.02896	0.05694
2322.28	0.01994	0.02578	0.0234	0.05925
2320.8	0.02046	0.02564	0.02766	0.06431
2319.33	0.02045	0.02536	0.02706	0.0679
2317.86	0.01825	0.02249	0.02505	0.06855
2316.38	0.02032	0.024	0.03079	0.07123
2314.91	0.0186	0.02358	0.02417	0.05831
2313.43	0.01945	0.0235	0.029	0.0773
2311.96	0.02069	0.02366	0.02378	0.06585
2310.48	0.01852	0.02132	0.02672	0.06724
2309.01	0.01995	0.02467	0.02249	0.05873
2307.53	0.01988	0.02291	0.02691	0.06799
2306.05	0.01894	0.02376	0.02754	0.06828
2304.58	0.01954	0.02435	0.02932	0.07223
2303.1	0.02076	0.02411	0.02699	0.06336
2301.62	0.02026	0.02275	0.0263	0.06273
2300.15	0.02055	0.02451	0.02957	0.06412
2298.67	0.0203	0.024	0.0223	0.06605
2297.19	0.01975	0.02321	0.02877	0.06067
2295.71	0.02011	0.02392	0.02594	0.06644
2294.23	0.0193	0.02199	0.02238	0.0691
2292.75	0.01935	0.02188	0.02506	0.0597
2291.28	0.01968	0.02255	0.0284	0.07479
2289.79	0.01837	0.02268	0.02706	0.06502
2288.32	0.02048	0.0248	0.02457	0.07426
2286.84	0.01991	0.02411	0.02881	0.05591
2285.36	0.01881	0.02006	0.02541	0.05437
2283.87	0.02002	0.02544	0.02342	0.07347
2282.39	0.01938	0.02244	0.02454	0.06536
2280.91	0.01987	0.02499	0.03091	0.05414
2279.43	0.02015	0.02324	0.02276	0.06575
2277.95	0.0186	0.02329	0.02642	0.0653
2276.46	0.02	0.02496	0.02861	0.06449
2274.98	0.02041	0.02433	0.02522	0.07317
2273.5	0.0175	0.02232	0.02453	0.0605
2272.02	0.01914	0.02242	0.0227	0.06425
2270.53	0.01987	0.02264	0.02275	0.06272
2269.05	0.02097	0.02539	0.02445	0.061
2267.56	0.01982	0.02142	0.02368	0.07185
2266.08	0.02021	0.02499	0.0248	0.07523
2264.6	0.01969	0.02214	0.02387	0.06586
2263.11	0.01939	0.02193	0.0263	0.0656
2261.62	0.0197	0.02177	0.02766	0.08336
2260.14	0.02067	0.02386	0.02256	0.05779
2258.65	0.01923	0.02106	0.0272	0.06536
2257.17	0.02006	0.02278	0.02299	0.07183
2255.68	0.01915	0.02172	0.02411	0.06338
2254.2	0.01911	0.02347	0.02973	0.07167
2252.71	0.02074	0.02407	0.02643	0.06341
2251.22	0.01944	0.02368	0.02885	0.0686
2249.73	0.01998	0.02331	0.02915	0.07179
2248.24	0.02127	0.02442	0.0252	0.06171
2246.76	0.02202	0.02542	0.02656	0.06709
2245.27	0.01987	0.0243	0.02563	0.06156
2243.78	0.02155	0.02363	0.02585	0.07237
2242.29	0.01977	0.02296	0.02851	0.07393
2240.8	0.02245	0.02506	0.02759	0.07258
2239.31	0.02019	0.02325	0.02666	0.06723
2237.82	0.02245	0.02527	0.025	0.08566
2236.33	0.02028	0.02381	0.02383	0.07578
2234.84	0.02188	0.02451	0.02992	0.06336
2233.35	0.01991	0.02198	0.02646	0.06836
2231.86	0.02069	0.02452	0.02643	0.07009
2230.37	0.02055	0.02427	0.02347	0.0711
2228.87	0.02035	0.0236	0.02752	0.06939
2227.38	0.02076	0.0239	0.02765	0.06405
2225.89	0.02146	0.02723	0.02656	0.06742
2224.39	0.02143	0.02451	0.02491	0.07042
2222.9	0.02076	0.024	0.0239	0.06762
2221.41	0.0204	0.02341	0.02469	0.0688
2219.91	0.02058	0.02351	0.02075	0.06058
2218.42	0.02096	0.02405	0.02748	0.06557
2216.93	0.02163	0.02729	0.02631	0.06603
2215.43	0.02094	0.0246	0.02685	0.06794
2213.94	0.02045	0.02486	0.02658	0.07365
2212.44	0.02207	0.02374	0.02671	0.06995
2210.95	0.02138	0.02211	0.02286	0.06155
2209.45	0.02058	0.02312	0.02796	0.06147
2207.95	0.02017	0.02306	0.02443	0.06953
2206.46	0.02111	0.02449	0.03099	0.07541
2204.96	0.02099	0.02372	0.03039	0.0681
2203.46	0.02163	0.02434	0.02483	0.07091
2201.97	0.0216	0.02527	0.02838	0.07805
2200.47	0.02014	0.02243	0.02738	0.07129
2198.97	0.02015	0.02129	0.02548	0.06164
2197.47	0.02269	0.02738	0.02683	0.07781
2195.97	0.02247	0.02509	0.02477	0.06599
2194.47	0.02122	0.02299	0.02434	0.06934
2192.97	0.02218	0.02222	0.02634	0.06024
2191.48	0.02157	0.02355	0.02534	0.06557
2189.98	0.02271	0.02709	0.03074	0.06117
2188.48	0.02084	0.02436	0.03096	0.06055
2186.98	0.02059	0.02514	0.02387	0.06515
2185.47	0.02074	0.02262	0.02547	0.05823
2183.97	0.02093	0.02248	0.02592	0.07058
2182.47	0.02126	0.02578	0.02582	0.06906
2180.97	0.02115	0.02744	0.02295	0.07078
2179.47	0.02095	0.02195	0.02972	0.07844
2177.97	0.02042	0.0239	0.02249	0.05027
2176.46	0.02166	0.02491	0.02716	0.07305
2174.96	0.0227	0.02607	0.02697	0.07279
2173.46	0.02227	0.02687	0.02912	0.07091
2171.96	0.02139	0.02276	0.03103	0.06561
2170.45	0.02107	0.02526	0.02074	0.06823
2168.95	0.022	0.02475	0.02127	0.07804
2167.44	0.0222	0.02698	0.02658	0.0625
2165.94	0.02111	0.0252	0.0234	0.0732
2164.43	0.02244	0.02714	0.02281	0.07402
2162.93	0.02185	0.02406	0.02011	0.06298
2161.42	0.02092	0.02217	0.02493	0.07763
2159.92	0.02193	0.02662	0.02837	0.0691
2158.41	0.02197	0.02598	0.02479	0.07118
2156.9	0.02034	0.02454	0.02904	0.072
2155.4	0.02281	0.02794	0.02522	0.0764
2153.89	0.02194	0.02364	0.02487	0.07022
2152.38	0.02208	0.02651	0.02355	0.0748
2150.88	0.02257	0.02702	0.0232	0.06503
2149.37	0.02122	0.0247	0.02793	0.07661
2147.86	0.02158	0.0268	0.02548	0.069
2146.35	0.02232	0.0259	0.02223	0.07573
2144.84	0.02171	0.02628	0.02534	0.07618
2143.33	0.02212	0.02723	0.02789	0.07377
2141.82	0.02223	0.02777	0.02633	0.07226
2140.31	0.02259	0.0268	0.02663	0.06734
2138.8	0.02247	0.02751	0.02958	0.07227
2137.29	0.02144	0.02569	0.0256	0.07434
2135.78	0.02177	0.02661	0.02654	0.07658
2134.27	0.02264	0.0292	0.02732	0.06773
2132.76	0.02216	0.02464	0.0289	0.07588
2131.25	0.02312	0.02785	0.02782	0.07401
2129.73	0.02167	0.02877	0.02715	0.07983
2128.22	0.02187	0.02454	0.02712	0.07134
2126.71	0.02371	0.02627	0.02203	0.07716
2125.2	0.02159	0.02418	0.02272	0.07118
2123.68	0.02199	0.02251	0.02768	0.07074
2122.17	0.02474	0.02771	0.02853	0.08067
2120.66	0.02296	0.0283	0.02939	0.07576
2119.14	0.02274	0.02932	0.0296	0.08175
2117.63	0.02101	0.02616	0.02355	0.07292
2116.11	0.02323	0.02778	0.02641	0.08319
2114.6	0.02291	0.02694	0.02373	0.07168
2113.08	0.02157	0.02558	0.02908	0.07785
2111.57	0.02288	0.02829	0.02416	0.06688
2110.05	0.02215	0.02673	0.02581	0.08196
2108.54	0.0238	0.02667	0.02514	0.07903
2107.02	0.02145	0.02661	0.02431	0.0727
2105.5	0.0233	0.02887	0.0254	0.06888
2103.98	0.02329	0.02778	0.02914	0.07468
2102.47	0.02458	0.02888	0.02911	0.07174
2100.95	0.02285	0.02703	0.02308	0.07309
2099.43	0.02365	0.02674	0.02337	0.0698
2097.91	0.02402	0.02753	0.02622	0.0699
2096.39	0.02246	0.02796	0.02331	0.07106
2094.87	0.02226	0.02792	0.02128	0.06706
2093.35	0.02349	0.02817	0.0239	0.0798
2091.83	0.02353	0.0278	0.02427	0.06922
2090.31	0.02293	0.02867	0.02656	0.07287
2088.79	0.02263	0.02526	0.02173	0.07546
2087.27	0.0227	0.02566	0.02538	0.06666
2085.75	0.02318	0.02521	0.02959	0.07938
2084.23	0.02252	0.02791	0.02349	0.0713
2082.71	0.02315	0.02581	0.02482	0.07513
2081.19	0.02373	0.02743	0.02591	0.08251
2079.67	0.02326	0.0286	0.02452	0.07248
2078.14	0.02392	0.0264	0.02409	0.06422
2076.62	0.02248	0.02616	0.02446	0.0748
2075.1	0.02343	0.02796	0.02739	0.06815
2073.57	0.02342	0.02622	0.02784	0.07179
2072.05	0.0241	0.02897	0.02071	0.07118
2070.53	0.02282	0.02656	0.02547	0.07713
2069	0.02366	0.02964	0.02927	0.07545
2067.48	0.02363	0.02647	0.02652	0.06455
2065.95	0.02478	0.02831	0.0253	0.06979
2064.43	0.02353	0.02717	0.02774	0.0791
2062.9	0.02385	0.02796	0.02604	0.0698
2061.38	0.02407	0.02764	0.02314	0.07787
2059.85	0.02313	0.02558	0.02614	0.0785
2058.32	0.02304	0.0268	0.02683	0.07115
2056.79	0.02352	0.02831	0.02194	0.07284
2055.27	0.02309	0.02614	0.02271	0.07276
2053.74	0.02336	0.02685	0.02658	0.07604
2052.21	0.02428	0.02849	0.01995	0.08039
2050.69	0.02391	0.02573	0.0282	0.07163
2049.16	0.02408	0.02901	0.02729	0.08234
2047.63	0.02476	0.03023	0.02201	0.0842
2046.1	0.02418	0.02678	0.02652	0.07245
2044.57	0.02334	0.02639	0.0222	0.07484
2043.04	0.0241	0.02577	0.02614	0.07016
2041.51	0.02265	0.02714	0.02492	0.07538
2039.98	0.02377	0.02788	0.02322	0.06823
2038.45	0.0224	0.02728	0.02192	0.06656
2036.92	0.02231	0.02681	0.02174	0.0875
2035.39	0.02407	0.02911	0.02687	0.07346
2033.86	0.02408	0.02802	0.02518	0.07727
2032.32	0.02435	0.03032	0.02404	0.07506
2030.79	0.02357	0.02739	0.02583	0.07904
2029.26	0.02495	0.0283	0.02287	0.06572
2027.73	0.02442	0.02653	0.02157	0.0697
2026.19	0.02202	0.02736	0.01964	0.08461
2024.66	0.02304	0.02725	0.02318	0.07183
2023.13	0.02444	0.02737	0.02323	0.07968
2021.59	0.0236	0.02711	0.02265	0.08559
2020.06	0.02444	0.02971	0.02389	0.06453
2018.52	0.02573	0.02855	0.02655	0.07961
2016.99	0.02331	0.02788	0.02431	0.07441
2015.45	0.0243	0.02751	0.02444	0.06764
2013.92	0.02426	0.0298	0.02876	0.07214
2012.38	0.02335	0.02785	0.02398	0.06871
2010.85	0.02367	0.02789	0.02807	0.08042
2009.31	0.02422	0.02977	0.02416	0.08175
2007.77	0.02462	0.03094	0.02247	0.07762
2006.23	0.02469	0.02858	0.02466	0.08422
2004.7	0.02303	0.02692	0.02439	0.07393
2003.16	0.02392	0.03079	0.02468	0.07508
2001.62	0.02293	0.02662	0.026	0.07324
2000.08	0.02548	0.02942	0.02526	0.07544
1998.54	0.02465	0.02706	0.02396	0.07641
1997.01	0.02407	0.02848	0.0237	0.07791
1995.47	0.02447	0.03005	0.02185	0.07976
1993.93	0.02469	0.02877	0.02182	0.07283
1992.39	0.02478	0.02991	0.02732	0.07046
1990.85	0.02551	0.0287	0.02374	0.08443
1989.3	0.02529	0.03025	0.02656	0.07486
1987.76	0.02477	0.02826	0.02755	0.0718
1986.22	0.02693	0.03206	0.02697	0.07364
1984.68	0.0248	0.032	0.02868	0.07654
1983.14	0.02478	0.03128	0.02928	0.08207
1981.6	0.02543	0.02853	0.02389	0.0869
1980.05	0.02307	0.0271	0.02614	0.07331
1978.51	0.02646	0.03006	0.02801	0.06973
1976.97	0.02415	0.03031	0.02341	0.08086
1975.43	0.02462	0.02789	0.02826	0.07342
1973.88	0.02642	0.03116	0.02587	0.07736
1972.34	0.02409	0.02947	0.02096	0.08656
1970.79	0.02726	0.03106	0.02605	0.06319
1969.25	0.02452	0.02875	0.02878	0.07134
1967.7	0.0256	0.03171	0.02851	0.06478
1966.16	0.02483	0.03013	0.02305	0.07485
1964.61	0.02446	0.02616	0.02932	0.07809
1963.07	0.02605	0.02732	0.0241	0.07643
1961.52	0.02464	0.02795	0.02572	0.07897
1959.97	0.02496	0.02807	0.02231	0.07941
1958.43	0.02474	0.02793	0.02818	0.0823
1956.88	0.02587	0.03127	0.02414	0.0761
1955.33	0.02553	0.02847	0.02497	0.08091
1953.79	0.02503	0.02986	0.02228	0.06947
1952.24	0.02522	0.02988	0.02295	0.07131
1950.69	0.02552	0.02997	0.02465	0.07507
1949.14	0.0255	0.02923	0.01952	0.07691
1947.59	0.02564	0.02796	0.02185	0.06652
1946.04	0.0251	0.02876	0.02716	0.07395
1944.49	0.02598	0.02827	0.02375	0.0716
1942.94	0.02561	0.0293	0.02239	0.08111
1941.39	0.02466	0.02772	0.02385	0.08103
1939.84	0.02502	0.02671	0.02288	0.08321
1938.29	0.02463	0.02859	0.02356	0.07336
1936.74	0.02528	0.02732	0.02126	0.07764
1935.19	0.0257	0.02828	0.02491	0.07581
1933.63	0.02556	0.02865	0.02457	0.07154
1932.08	0.02486	0.02811	0.02548	0.06867
1930.53	0.02543	0.02853	0.0224	0.07295
1928.97	0.02585	0.02911	0.02464	0.07652
1927.42	0.02569	0.02842	0.02501	0.07417
1925.87	0.02494	0.02851	0.02216	0.07618
1924.31	0.02505	0.02856	0.02737	0.06774
1922.76	0.02555	0.02789	0.02656	0.06923
1921.21	0.02553	0.02786	0.02278	0.07054
1919.65	0.0259	0.02987	0.02017	0.07063
1918.1	0.02427	0.02666	0.02507	0.06759
1916.54	0.02446	0.02963	0.01886	0.06716
1914.98	0.02445	0.02912	0.02009	0.07473
1913.43	0.026	0.02924	0.02186	0.06439
1911.87	0.02526	0.02641	0.02456	0.07613
1910.31	0.02595	0.0292	0.0236	0.07743
1908.76	0.02478	0.02816	0.02513	0.07509
1907.2	0.0257	0.02782	0.02307	0.07449
1905.64	0.02526	0.03054	0.02328	0.07076
1904.08	0.02656	0.03028	0.02403	0.07484
1902.53	0.02564	0.03077	0.01877	0.07233
1900.97	0.02684	0.02931	0.02085	0.0686
1899.41	0.02493	0.02784	0.02191	0.07598
1897.85	0.0283	0.03289	0.02157	0.08058
1896.29	0.02602	0.03062	0.02529	0.07287
1894.73	0.02547	0.03046	0.02627	0.07469
1893.17	0.02776	0.03284	0.0218	0.06542
1891.61	0.02623	0.02912	0.01796	0.0766
1890.05	0.02698	0.03039	0.0251	0.0831
1888.49	0.02502	0.03081	0.02172	0.07696
1886.92	0.0274	0.03158	0.02488	0.06995
1885.36	0.02603	0.03047	0.02431	0.07506
1883.8	0.02705	0.02966	0.0186	0.07342
1882.24	0.02522	0.0295	0.02067	0.08182
1880.67	0.02637	0.0313	0.02298	0.06823
1879.11	0.02739	0.0336	0.02769	0.07905
1877.55	0.02682	0.02991	0.02385	0.0698
1875.98	0.02789	0.03153	0.02297	0.07698
1874.42	0.0274	0.03215	0.02675	0.07188
1872.86	0.02915	0.03207	0.02454	0.07923
1871.29	0.0273	0.03174	0.02312	0.06705
1869.72	0.02779	0.03311	0.02254	0.08287
1868.16	0.02753	0.03313	0.02298	0.07846
1866.59	0.02729	0.03355	0.02614	0.08097
1865.03	0.02765	0.03171	0.02021	0.07743
1863.46	0.02734	0.03018	0.02251	0.08218
1861.89	0.02762	0.03122	0.02582	0.0802
1860.33	0.02661	0.03219	0.02618	0.08374
1858.76	0.02853	0.03263	0.02328	0.07865
1857.19	0.02831	0.03168	0.02565	0.06287
1855.62	0.02745	0.0309	0.02547	0.07245
1854.06	0.02748	0.03149	0.0218	0.07805
1852.49	0.02684	0.03098	0.02084	0.06883
1850.92	0.02801	0.03078	0.02321	0.08633
1849.35	0.028	0.03232	0.02543	0.07315
1847.78	0.02645	0.02944	0.02122	0.06652
1846.21	0.02898	0.03261	0.02437	0.07557
1844.64	0.02731	0.03088	0.01799	0.08168
1843.07	0.02722	0.02997	0.02276	0.07247
1841.5	0.02831	0.03161	0.02126	0.07583
1839.93	0.02712	0.03046	0.02193	0.07403
1838.36	0.02743	0.03011	0.02275	0.07498
1836.78	0.02865	0.03232	0.02118	0.07111
1835.21	0.0272	0.03042	0.02007	0.06243
1833.64	0.02909	0.03204	0.02213	0.0675
1832.06	0.02833	0.02977	0.02248	0.06691
1830.49	0.02827	0.02951	0.02609	0.07851
1828.92	0.0284	0.03145	0.01771	0.06967
1827.34	0.02674	0.02918	0.02495	0.06649
1825.77	0.0275	0.03334	0.0216	0.06263
1824.2	0.02894	0.03156	0.02257	0.07938
1822.62	0.0274	0.03002	0.02401	0.06934
1821.05	0.02786	0.03131	0.02298	0.06754
1819.47	0.02758	0.03083	0.01801	0.07243
1817.89	0.02856	0.03299	0.02192	0.08007
1816.32	0.02705	0.02978	0.01796	0.06334
1814.74	0.02789	0.02888	0.02001	0.06309
1813.17	0.02705	0.03061	0.02307	0.07982
1811.59	0.02651	0.02904	0.02481	0.05556
1810.01	0.02897	0.03255	0.02239	0.07296
1808.43	0.02793	0.02936	0.01551	0.07082
1806.86	0.02817	0.0303	0.02164	0.06097
1805.28	0.02681	0.03007	0.02216	0.07323
1803.7	0.02824	0.03278	0.02228	0.07417
1802.12	0.0292	0.03195	0.0231	0.06604
1800.54	0.02842	0.03264	0.02423	0.07229
1798.96	0.02878	0.03157	0.01889	0.06673
1797.38	0.02844	0.03055	0.0187	0.06853
1795.8	0.02795	0.03102	0.02399	0.06982
1794.22	0.02767	0.03039	0.02273	0.0605
1792.64	0.02972	0.035	0.01877	0.06606
1791.06	0.03018	0.03314	0.02036	0.06119
1789.47	0.02982	0.03286	0.02233	0.06436
1787.89	0.02839	0.03177	0.02384	0.0771
1786.31	0.02999	0.03345	0.02028	0.07616
1784.73	0.02854	0.03	0.02094	0.07352
1783.14	0.02897	0.0329	0.0213	0.07002
1781.56	0.02898	0.03188	0.0248	0.06908
1779.98	0.02855	0.03222	0.02047	0.06814
1778.39	0.02776	0.0309	0.02305	0.07045
1776.81	0.02815	0.03167	0.01788	0.07037
1775.22	0.02967	0.03399	0.02277	0.0679
1773.64	0.03115	0.03503	0.0212	0.0743
1772.05	0.0298	0.03378	0.02003	0.08121
1770.47	0.02894	0.03252	0.02675	0.07635
1768.88	0.02848	0.03373	0.02365	0.08547
1767.3	0.02946	0.0311	0.02247	0.07311
1765.71	0.0287	0.03159	0.02221	0.07473
1764.12	0.02973	0.03488	0.02218	0.0755
1762.54	0.02937	0.03584	0.02124	0.0761
1760.95	0.03094	0.03509	0.02136	0.07431
1759.36	0.02979	0.03269	0.02133	0.08036
1757.77	0.02886	0.03301	0.02429	0.06989
1756.18	0.03122	0.03634	0.02028	0.06521
1754.59	0.02982	0.0352	0.02553	0.07245
1753.01	0.03177	0.0363	0.02329	0.06454
1751.42	0.02967	0.03334	0.01867	0.06769
1749.83	0.02961	0.03235	0.02483	0.07815
1748.24	0.03165	0.03533	0.02114	0.07109
1746.64	0.03117	0.03829	0.02141	0.06217
1745.05	0.03085	0.03426	0.01848	0.07416
1743.46	0.03111	0.03569	0.02457	0.0666
1741.87	0.03164	0.03766	0.02209	0.07212
1740.28	0.02926	0.03438	0.0252	0.06983
1738.69	0.02922	0.03445	0.0199	0.05972
1737.1	0.03244	0.03789	0.02514	0.08274
1735.5	0.02909	0.03473	0.02289	0.07077
1733.91	0.03009	0.03355	0.02058	0.07612
1732.32	0.03154	0.03802	0.02001	0.08486
1730.72	0.03066	0.03603	0.01762	0.07442
1729.13	0.02951	0.033	0.02774	0.06688
1727.53	0.03085	0.03538	0.02298	0.07137
1725.94	0.03104	0.03525	0.02242	0.07689
1724.34	0.03164	0.03606	0.0233	0.0746
1722.75	0.0319	0.0367	0.02328	0.06977
1721.15	0.02991	0.03338	0.02096	0.08324
1719.56	0.03128	0.03549	0.0252	0.06215
1717.96	0.03195	0.03511	0.02151	0.07833
1716.36	0.0327	0.03509	0.02202	0.06673
1714.77	0.03321	0.03599	0.02016	0.0702
1713.17	0.03179	0.03294	0.02394	0.06961
1711.57	0.03113	0.0351	0.02155	0.06682
1709.97	0.03181	0.03321	0.01924	0.06166
1708.37	0.02975	0.0321	0.02363	0.07004
1706.78	0.02937	0.03499	0.02025	0.07638
1705.18	0.03014	0.03374	0.02228	0.07884
1703.58	0.03195	0.03337	0.0205	0.07182
1701.98	0.03204	0.03533	0.02131	0.0905
1700.38	0.03274	0.03535	0.02606	0.06269
1698.78	0.03159	0.03409	0.02277	0.06684
1697.18	0.03155	0.0338	0.02251	0.0725
1695.57	0.03264	0.0358	0.02476	0.06363
1693.97	0.03354	0.03649	0.02413	0.07081
1692.37	0.03119	0.03448	0.02546	0.07512
1690.77	0.03307	0.03592	0.01989	0.06457
1689.17	0.0334	0.03677	0.02055	0.05942
1687.56	0.03341	0.03549	0.02591	0.06778
1685.96	0.0331	0.0363	0.02064	0.07411
1684.36	0.03183	0.03353	0.02062	0.06306
1682.75	0.03251	0.03363	0.02142	0.0704
1681.15	0.03131	0.03392	0.0217	0.06829
1679.54	0.03331	0.03455	0.02728	0.07124
1677.94	0.03357	0.03645	0.01853	0.07184
1676.33	0.0336	0.03503	0.01813	0.07226
1674.73	0.03234	0.0332	0.02279	0.06678
1673.12	0.03289	0.03476	0.02057	0.07041
1671.52	0.03268	0.0341	0.0191	0.06426
1669.91	0.03404	0.03654	0.02399	0.08068
1668.3	0.0325	0.03536	0.02048	0.06746
1666.7	0.03381	0.03504	0.02295	0.06906
1665.09	0.03412	0.03477	0.02209	0.07823
1663.48	0.0342	0.03716	0.02184	0.06419
1661.87	0.03362	0.03591	0.02468	0.07504
1660.27	0.03383	0.03735	0.02004	0.06302
1658.66	0.03374	0.03779	0.02243	0.0584
1657.05	0.03392	0.03647	0.02089	0.06655
1655.44	0.03352	0.03607	0.02215	0.07437
1653.83	0.03472	0.03734	0.02748	0.07311
1652.22	0.03469	0.03753	0.02224	0.06714
1650.61	0.03418	0.0385	0.0238	0.06672
1649	0.03368	0.0348	0.02445	0.07403
1647.38	0.03562	0.03981	0.02344	0.06925
1645.77	0.03453	0.03859	0.02137	0.07957
1644.16	0.03403	0.03652	0.02029	0.06707
1642.55	0.03516	0.03683	0.02094	0.06916
1640.94	0.0358	0.03895	0.028	0.06841
1639.32	0.03398	0.03654	0.02156	0.06397
1637.71	0.03455	0.037	0.02311	0.06439
1636.1	0.03361	0.03658	0.02346	0.06984
1634.48	0.03445	0.03799	0.02479	0.0664
1632.87	0.03378	0.03436	0.02227	0.07068
1631.26	0.03533	0.03784	0.02451	0.07277
1629.64	0.03419	0.03543	0.02455	0.07671
1628.03	0.03498	0.03815	0.02377	0.07394
1626.41	0.03328	0.03705	0.0205	0.06114
1624.79	0.03429	0.0369	0.01784	0.06725
1623.18	0.03399	0.03625	0.01706	0.07486
1621.56	0.03412	0.03724	0.01658	0.07193
1619.95	0.03464	0.03825	0.01994	0.05596
1618.33	0.03504	0.03714	0.02284	0.06909
1616.71	0.03483	0.03755	0.02003	0.07687
1615.09	0.03479	0.0389	0.02346	0.06675
1613.47	0.03446	0.03791	0.02028	0.066
1611.86	0.0341	0.0371	0.0204	0.06976
1610.24	0.03387	0.03529	0.02353	0.05782
1608.62	0.03461	0.03674	0.01929	0.06826
1607	0.0352	0.03724	0.02242	0.06066
1605.38	0.03526	0.03693	0.01909	0.06726
1603.76	0.03359	0.0347	0.02183	0.059
1602.14	0.03499	0.03569	0.0188	0.07377
1600.52	0.03507	0.03738	0.0232	0.06734
1598.89	0.03464	0.03658	0.0195	0.06309
1597.27	0.03477	0.03779	0.01775	0.06651
1595.65	0.03549	0.03675	0.01929	0.06626
1594.03	0.03407	0.03488	0.01836	0.06301
1592.41	0.03471	0.03747	0.01946	0.06576
1590.78	0.03343	0.0344	0.02258	0.05935
1589.16	0.03441	0.03664	0.01461	0.06543
1587.54	0.03381	0.03647	0.01676	0.05486
1585.91	0.03339	0.0355	0.01755	0.05194
1584.29	0.03543	0.03642	0.01835	0.05902
1582.66	0.03261	0.03159	0.01929	0.05928
1581.04	0.03344	0.0355	0.01732	0.0577
1579.41	0.0344	0.03555	0.01363	0.06477
1577.79	0.03499	0.03521	0.01943	0.0612
1576.16	0.03287	0.0346	0.01806	0.06311
1574.54	0.03292	0.03542	0.01556	0.0597
1572.91	0.03315	0.03431	0.02331	0.05463
1571.28	0.03307	0.03441	0.01708	0.06353
1569.65	0.03414	0.03614	0.01832	0.05215
1568.03	0.03313	0.03593	0.02083	0.05157
1566.4	0.0323	0.03296	0.01378	0.05647
1564.77	0.03243	0.03395	0.01936	0.05058
1563.14	0.03413	0.03433	0.01619	0.05797
1561.51	0.03402	0.03426	0.01751	0.05656
1559.88	0.03132	0.03303	0.01882	0.05499
1558.25	0.03387	0.03486	0.01924	0.05059
1556.62	0.03361	0.03674	0.01854	0.06561
1554.99	0.03275	0.03433	0.01978	0.04712
1553.36	0.03515	0.03822	0.01513	0.06263
1551.73	0.03145	0.03366	0.01794	0.05359
1550.1	0.03348	0.0364	0.01799	0.04771
1548.47	0.03337	0.03539	0.01677	0.05724
1546.84	0.03406	0.03687	0.01614	0.0623
1545.2	0.03426	0.03474	0.01537	0.06271
1543.57	0.03422	0.03714	0.02123	0.05866
1541.94	0.03298	0.03672	0.01643	0.06586
1540.3	0.03446	0.0363	0.0135	0.06594
1538.67	0.0335	0.03559	0.0169	0.0609
1537.04	0.03378	0.03633	0.01657	0.05436
1535.4	0.03244	0.03541	0.01818	0.06172
1533.77	0.03245	0.03561	0.0189	0.06181
1532.13	0.03337	0.03472	0.01589	0.06586
1530.5	0.03401	0.03735	0.01564	0.04461
1528.86	0.03298	0.03796	0.01807	0.06206
1527.22	0.03189	0.03392	0.01856	0.05371
1525.59	0.03283	0.03425	0.01497	0.06057
1523.95	0.03378	0.03623	0.0113	0.05752
1522.31	0.03413	0.0373	0.01736	0.05975
1520.68	0.03284	0.03614	0.01867	0.05158
1519.04	0.03259	0.03659	0.01419	0.05232
1517.4	0.03252	0.03576	0.01943	0.04861
1515.76	0.03323	0.03832	0.01963	0.06074
1514.12	0.03257	0.03687	0.01656	0.05489
1512.48	0.03102	0.03406	0.01957	0.05035
1510.84	0.03223	0.0365	0.01524	0.05555
1509.2	0.03298	0.0373	0.01722	0.06619
1507.56	0.03047	0.03497	0.0163	0.05011
1505.92	0.03113	0.03494	0.01501	0.05613
1504.28	0.03157	0.03579	0.01306	0.05918
1502.64	0.03036	0.03483	0.0151	0.06025
1501	0.03159	0.03484	0.01404	0.04996
1499.36	0.03385	0.03713	0.0149	0.05811
1497.71	0.03278	0.03607	0.01473	0.06001
1496.07	0.03059	0.03272	0.0144	0.05054
1494.43	0.03151	0.03403	0.01645	0.04569
1492.79	0.03159	0.0344	0.0159	0.05022
1491.14	0.03222	0.03604	0.00922	0.04553
1489.5	0.03176	0.03503	0.01696	0.05138
1487.85	0.03203	0.03552	0.01538	0.04554
1486.21	0.03134	0.03444	0.01424	0.05894
1484.56	0.03277	0.03479	0.0103	0.04621
1482.92	0.03278	0.0381	0.01448	0.04366
1481.27	0.03169	0.03485	0.01807	0.05262
1479.62	0.0321	0.0348	0.0111	0.04301
1477.98	0.03094	0.03465	0.01337	0.04803
1476.33	0.03035	0.03271	0.01105	0.05271
1474.68	0.03297	0.03816	0.01191	0.05115
1473.04	0.03183	0.03487	0.01255	0.04861
1471.39	0.03194	0.03712	0.01215	0.0528
1469.74	0.03197	0.03483	0.01353	0.04911
1468.09	0.03074	0.03194	0.0062	0.05017
1466.44	0.03118	0.03451	0.01421	0.04927
1464.79	0.03138	0.03493	0.0116	0.05149
1463.14	0.02953	0.03385	0.01747	0.05961
1461.49	0.0303	0.03211	0.01111	0.04723
1459.84	0.03043	0.03329	0.00666	0.05223
1458.19	0.0322	0.03559	0.01194	0.05035
1456.54	0.03305	0.03585	0.01176	0.05011
1454.89	0.03091	0.03432	0.0152	0.04217
1453.24	0.03161	0.03408	0.01458	0.04487
1451.59	0.03091	0.03357	0.0105	0.04561
1449.94	0.03149	0.03578	0.0118	0.05339
1448.28	0.03174	0.03655	0.01001	0.04431
1446.63	0.03311	0.03548	0.01065	0.04341
1444.97	0.03271	0.03633	0.01062	0.05135
1443.32	0.0302	0.03599	0.0142	0.048
1441.67	0.03223	0.03598	0.0149	0.03991
1440.01	0.03262	0.03811	0.01444	0.04931
1438.36	0.03108	0.03481	0.01331	0.05021
1436.7	0.03378	0.03763	0.01482	0.04572
1435.05	0.02965	0.03393	0.01208	0.03617
1433.39	0.03178	0.03511	0.00977	0.04932
1431.73	0.02967	0.03479	0.01092	0.04646
1430.08	0.03094	0.03462	0.00891	0.03594
1428.42	0.03024	0.03445	0.01285	0.04435
1426.76	0.03272	0.03688	0.014	0.04035
1425.11	0.03273	0.03825	0.01214	0.03538
1423.45	0.03191	0.03609	0.01387	0.0446
1421.79	0.03308	0.03732	0.01274	0.0411
1420.13	0.03069	0.03554	0.00927	0.04493
1418.47	0.03149	0.03714	0.00726	0.04974
1416.81	0.03104	0.03574	0.01317	0.05944
1415.15	0.0334	0.0375	0.0089	0.04355
1413.49	0.03211	0.03712	0.01253	0.04185
1411.83	0.03112	0.03643	0.01346	0.04389
1410.17	0.03336	0.03871	0.00867	0.03567
1408.51	0.03334	0.03846	0.01289	0.04764
1406.85	0.03383	0.03985	0.01169	0.0456
1405.19	0.03168	0.03661	0.01225	0.04845
1403.53	0.03188	0.03653	0.01091	0.03845
1401.86	0.03108	0.03645	0.01118	0.04374
1400.2	0.03242	0.03653	0.01268	0.05326
1398.54	0.03125	0.03782	0.01222	0.04358
1396.87	0.03175	0.03626	0.01241	0.0435
1395.21	0.03283	0.0384	0.00917	0.05822
1393.54	0.03251	0.0381	0.0117	0.04595
1391.88	0.03117	0.03525	0.00963	0.03661
1390.21	0.03165	0.03623	0.01092	0.04758
1388.55	0.03064	0.03405	0.01147	0.03499
1386.88	0.03103	0.03647	0.01174	0.03946
1385.22	0.03302	0.03689	0.0104	0.04377
1383.55	0.03166	0.03495	0.01263	0.04466
1381.88	0.03196	0.03631	0.01545	0.02884
1380.22	0.03263	0.03776	0.01222	0.03493
1378.55	0.03096	0.03406	0.00687	0.03469
1376.88	0.03135	0.03494	0.01158	0.04353
1375.21	0.03195	0.03663	0.00944	0.04038
1373.55	0.03184	0.03655	0.01014	0.045
1371.88	0.03069	0.0348	0.00771	0.03422
1370.21	0.03261	0.03515	0.01482	0.0335
1368.54	0.0325	0.03582	0.00795	0.03828
1366.87	0.03098	0.0364	0.01011	0.03416
1365.2	0.0296	0.0344	0.00906	0.04752
1363.53	0.03149	0.035	0.01122	0.04533
1361.86	0.03285	0.03767	0.01243	0.03117
1360.19	0.03076	0.03492	0.01269	0.0387
1358.51	0.03263	0.03613	0.00794	0.03539
1356.84	0.0305	0.03291	0.009	0.03418
1355.17	0.03114	0.03595	0.00861	0.03847
1353.5	0.03143	0.0339	0.00837	0.03467
1351.82	0.03036	0.03364	0.00885	0.04236
1350.15	0.03136	0.03302	0.00657	0.03824
1348.48	0.03132	0.0343	0.00764	0.03105
1346.8	0.0314	0.0354	0.0095	0.0313
1345.13	0.02986	0.03104	0.00773	0.0393
1343.45	0.03064	0.03194	0.01308	0.03001
1341.78	0.02936	0.03372	0.00898	0.0343
1340.1	0.03118	0.03495	0.00903	0.0318
1338.43	0.03107	0.03602	0.01002	0.03092
1336.75	0.02946	0.03274	0.00753	0.02955
1335.07	0.03163	0.03493	0.00518	0.02383
1333.4	0.03108	0.03555	0.009	0.0244
1331.72	0.0301	0.03246	0.00919	0.03529
1330.04	0.03175	0.03528	0.00909	0.02038
1328.36	0.03089	0.03292	0.00479	0.03417
1326.69	0.03102	0.03317	0.00679	0.03441
1325.01	0.03108	0.03356	0.00561	0.03337
1323.33	0.03095	0.0346	0.00993	0.0283
1321.65	0.03168	0.03473	0.01157	0.03064
1319.97	0.03033	0.03405	0.00676	0.03314
1318.29	0.0321	0.03498	0.00826	0.03274
1316.61	0.03208	0.03689	0.00649	0.02912
1314.93	0.03172	0.03434	0.00856	0.0321
1313.25	0.03119	0.03491	0.0063	0.04087
1311.56	0.03202	0.03668	0.00634	0.03581
1309.88	0.03172	0.03516	0.00957	0.02432
1308.2	0.03218	0.0352	0.00716	0.02553
1306.52	0.03275	0.03419	0.00706	0.02642
1304.83	0.03271	0.03928	0.00891	0.0347
1303.15	0.03178	0.03674	0.00686	0.03558
1301.47	0.03448	0.03864	0.00756	0.0294
1299.78	0.0329	0.03575	0.00631	0.02933
1298.1	0.03205	0.03462	0.00505	0.02829
1296.41	0.03203	0.03548	0.00705	0.03126
1294.73	0.03316	0.03601	0.01085	0.02621
1293.04	0.03329	0.03553	0.00772	0.0295
1291.36	0.03439	0.03776	0.00877	0.01948
1289.67	0.03151	0.03361	0.00904	0.02775
1287.98	0.03352	0.03524	0.00988	0.02879
1286.3	0.03223	0.03439	0.00502	0.03273
1284.61	0.0324	0.03481	0.00283	0.0248
1282.92	0.03301	0.03703	0.00814	0.01238
1281.23	0.03251	0.03598	0.01078	0.02064
1279.54	0.03196	0.0353	0.00485	0.03018
1277.86	0.03253	0.03529	0.00648	0.03298
1276.17	0.03286	0.03654	0.00465	0.03307
1274.48	0.03366	0.03526	0.00578	0.01906
1272.79	0.03155	0.03525	0.00467	0.02491
1271.1	0.03082	0.0329	0.00551	0.02004
1269.41	0.03171	0.03394	0.00527	0.02684
1267.72	0.03053	0.03275	0.00445	0.02213
1266.03	0.03126	0.03212	0.01003	0.02269
1264.33	0.03141	0.03429	0.00613	0.01958
1262.64	0.03196	0.03579	0.00481	0.02478
1260.95	0.03252	0.0356	0.00557	0.01975
1259.26	0.03214	0.03467	0.00583	0.02479
1257.56	0.03194	0.03455	0.0048	0.01785
1255.87	0.03208	0.03422	0.00435	0.02033
1254.18	0.03175	0.03338	0.00612	0.02329
1252.48	0.02938	0.03398	0.00264	0.01236
1250.79	0.03037	0.03346	0.00205	0.01803
1249.09	0.03121	0.03267	0.00072891	0.01445
1247.4	0.03055	0.03248	0.00278	0.01692
1245.7	0.02838	0.03012	0.00434	0.01318
1244.01	0.02899	0.03175	0.00431	0.02459
1242.31	0.03188	0.03385	0.00012859	0.01033
1240.61	0.03098	0.03271	0.00354	0.01583
1238.92	0.0299	0.03148	0.00968	0.0215
1237.22	0.03003	0.03296	0.004	0.01871
1235.52	0.03087	0.0332	0.000889989	0.01227
1233.82	0.03093	0.03387	0.00387	0.02064
1232.12	0.03138	0.03589	0.00327	0.01961
1230.43	0.03321	0.03752	0.00397	0.01364
1228.73	0.03107	0.03503	0.00373	0.01994
1227.03	0.03147	0.03517	0.00842	0.01732
1225.33	0.03044	0.03498	0.0016	0.0104
1223.63	0.03195	0.03509	0.00608	0.0178
1221.93	0.03106	0.03447	0.00277	0.01264
1220.23	0.03176	0.03535	0.0051	0.00669
1218.53	0.03041	0.03442	0	0.01409
1216.82	0.03203	0.03507	0.00483	0.02307
1215.12	0.03063	0.03357	0.00617	0.01458
1213.42	0.02972	0.03437	0.00535	0.01323
1211.72	0.0307	0.03391	0.00519	0.01189
1210.01	0.02992	0.03318	0.000876925	0.01769
1208.31	0.03189	0.03529	0.000780836	0.02317
1206.61	0.03091	0.03432	0.00668	0.01167
1204.9	0.02979	0.03271	0.0013	0.01271
1203.2	0.03044	0.03515	0.00741	0.01581
1201.49	0.0296	0.03377	0.00389	0.01827
1199.79	0.03014	0.03423	0.00372	0.01439
[truncated: 602 more rows]

## Sheet: fig 3a
0	0	0	0	0	0	0
30	-0.000293206	6.54792e-05	0.00247	0.000262345	0	0
60	0.000112985	0.000119001	0.01023	4.13991e-05	0	0
90	0.000568372	8.61555e-05	0.02545	0.000173566	0	0
120	0.00759	8.66025e-05	0.0594	0.000116726	0	0
150	0.01778	0.00015748	0.11415	0.000205244	0	0
180	0.01992	4.71699e-05	0.12441	0.000205244	0	0

## Sheet: fig 3b
0	0	0	0	0	0	0
60	1.2647e-05	8.34132e-06	0.00253	3.49857e-05	0.0025	2.20389e-05
120	0.00377	9.57427e-06	0.00391	2.22711e-05	0.00322	3.4641e-05
180	0.00447	1.34371e-05	0.01159	2.05913e-05	0.00434	8.32993e-06
240	0.00625	1.70783e-05	0.0153	2.31517e-05	0.0048	6.38877e-06
300	0.00768	2e-05	0.02533	2.05913e-05	0.00564	1.45686e-05
360	0.01042	1.29099e-05	0.03009	9.2e-05	0.00628	1.46486e-05

[truncated: 9 more sheets: fig 3c, fig 3d, fig 4, fig s3, fig s4, figs5, s6, s7, XRD]
